# Supplementary material for: Construction of cyclobutane-fused tetracyclic skeletons via substrate-dependent EnT-enabled dearomative [2+2] cycloaddition of benzofurans (benzothiophenes)/maleimides
Source: Royal Society of Chemistry journal article supplement (doi:10.1039/d4cc00690a), 2024-01-01

## Supporting Information

### Construction of Cyclobutane-fused Tetracyclic Skeletons via Substrate-dependent EnT-enabled Dearomative [2+2] Cycloaddition of Benzofurans (Benzothiophenes)/Maleimides

Zhi-Yu Liao, ‡<sup>1</sup> Fan Gao, ‡<sup>1</sup> Yu-Hang Ye, <sup>1</sup> Qian-Hui Yu, <sup>1</sup> Cui Yang, <sup>1</sup> Qing-Yu Luo, <sup>1</sup> Fei Du, <sup>1</sup> Bin Pan, <sup>3</sup> Wen-Wu Zhong, \*<sup>2</sup> and Wu Liang \*<sup>1</sup>

<sup>1</sup> College of Pharmacy, Chongqing Medical University, Chongqing, 400016 (China)

<sup>2</sup> Department of Pharmacy, Chongqing Medical and Pharmaceutical College, Shapingba, Chongqing 401334 (China)

<sup>3</sup> College of Pharmacy, Third Military Medical University, Shapingba, Chongqing 400038 (China)

‡Zhi-Yu Liao and ‡Fan Gao contributed equally to this work.

Corresponding author: [liangwu8619@cqmu.edu.cn](mailto:liangwu8619@cqmu.edu.cn)

### Table of Contents

|                                                           |            |
|-----------------------------------------------------------|------------|
| <b>Materials and Methods</b> .....                        | <b>S2</b>  |
| <b>Preparation of Substrates</b> .....                    | <b>S3</b>  |
| <b>Optimization of the Reaction Conditions</b> .....      | <b>S6</b>  |
| <b>Photosensitized Cycloadditions</b> .....               | <b>S9</b>  |
| <b>Characterization of compounds</b> .....                | <b>S10</b> |
| <b>Mechanistic Studies</b> .....                          | <b>S34</b> |
| <b>X-Ray Crystallographic Data</b> .....                  | <b>S40</b> |
| <b>References</b> .....                                   | <b>S45</b> |
| <b><sup>1</sup>H and <sup>13</sup>C NMR Spectra</b> ..... | <b>S46</b> |

## 1. Materials and Methods

$^1\text{H}$  NMR (600 MHz) and  $^{13}\text{C}$  NMR (150 MHz) spectra were recorded on Bruker AVANCE III 600 instrument, and chemical shifts were reported in ppm from tetramethylsilane (TMS) with the solvent resonance as the internal standard in  $\text{CDCl}_3$  solution and  $\text{DMSO}-d_6$  solution. The following abbreviations were used to explain the multiplicities: s = singlet, d = doublet, t = triplet, dd = double doublet, m = multiplet, br (broad), or a combination of them, and coupling constants ( $J$ ) are reported in hertz (Hz). High-resolution mass spectra were obtained with a waters G2-xs qtof by ESI on a TOF mass analyzer. Melting points were measured on a melting point apparatus and are uncorrected. UV detection was monitored at 254 nm. Photochemical reactions were carried with 20 W 450 nm Blue LEDs, and 30 W 390 nm LEDs. For light-promoted reactions, the material of the irradiation vessel was borosilicate glass purchased from Synthware. Column chromatography was performed on silica gel (200-300 mesh) eluting with ethyl acetate (EtOAc), petroleum ether (PE), and dichloromethane (DCM). TLC was performed on glass-backed silica plates. UV light and  $\text{I}_2$  were used to visualize products or starting materials. Unless otherwise specified, all reagents were obtained from commercial suppliers and used without further purification. All experiments were performed under an atmosphere of argon atmosphere.

## 2.Preparation of Substrates

**2a, 2i, 2j, 2l** were purchased from Titan and Bide, **2b-2h, 2k, 2m-2o** were synthesized according to the literature procedures.<sup>[1-4]</sup>

**Table S1** List of maleimides

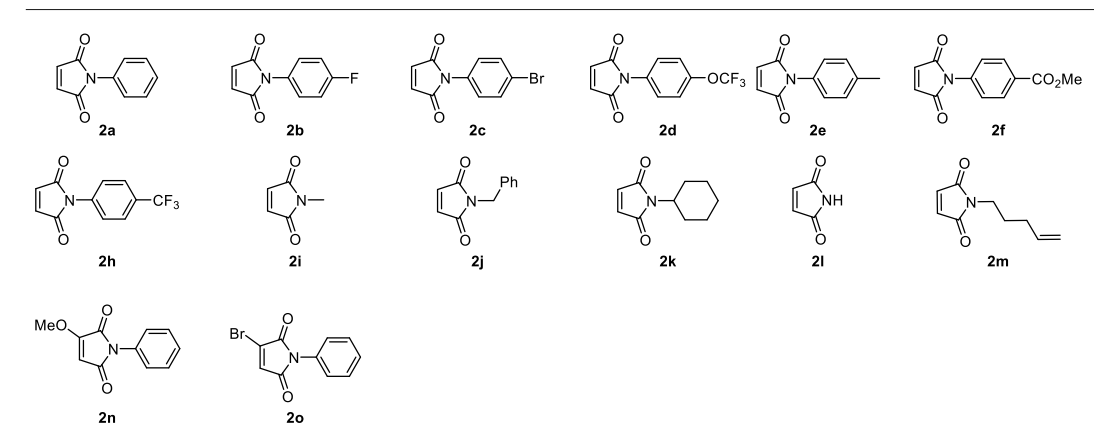

### General Method for the Synthesis of Substituted Maleimides

#### Method A

The *N*-Phenylmaleimides were prepared from maleic anhydride and amine according to the reported procedure<sup>[1]</sup>.

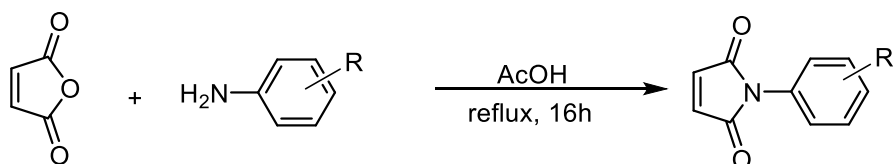

To a solution of maleic anhydride (981 mg, 10.00 mmol) in glacial acetic acid (6 mL), amine (4.00 mmol) was added and the reaction mixture was refluxed for 16 h. Subsequently, the solvent was removed in vacuo, the residue was dissolved in CH<sub>2</sub>Cl<sub>2</sub> (15 mL) and the organic layer was washed with aq. NaHCO<sub>3</sub> 10% (2 x 25 mL), aq. HCl 1N (2 x 25 mL) and saturated aq. NaCl (20 mL). The organic layer was dried over Na<sub>2</sub>SO<sub>4</sub> and the solvent was removed in vacuo. The crude reaction mixture was further purified by column chromatography on silica gel (Pet. Ether/ EtOAc 5:1), to obtain the desired product.

#### Method B

**2n, 2o** were prepared according to the reported procedure<sup>[2,3]</sup>.

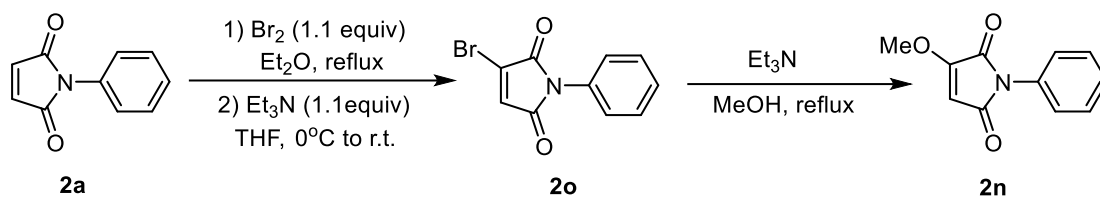

### Step 1

Bromine (0.3 mL, 5 mmol) was added to a magnetically stirred slurry of *N*-phenylmaleimide (865mg, 5.5 mmol.) in diethyl ether (14 mL). The ensuing mixture was heated at reflux for 1 h , then cooled to 0 °C and triethylamine (0.76 mL, 5.5 mmol) was added. The reaction mixture was then stirred for a further 2 h at 0 °C before being warmed to room temperature and diluted with ethyl acetate (10 mL) and water (10 mL). The separated aqueous layer was extracted with ethyl acetate (3×10 mL) and the combined organic phases were washed with water (1×10 mL) and brine (1×10 mL), then dried over MgSO<sub>4</sub> and filtered, finally concentrated under reduced pressure to obtain a white-solid product (769mg, 61 %).

### Step 2

To a solution of 2-Bromo-*N*-phenylmaleimide (1.0 g, 3.97 mmol) in MeOH (10 mL) was added a solution of Et<sub>3</sub>N (0.61 mL, 4.37 mmol) in MeOH (5 mL), and the reaction mixture was refluxed for 1 h. Concentration of the mixture in vacuo followed by silica gel column chromatographic purification of the residue using petroleum ether–EtOAc (8:2) as eluent and gave a white-solid product (604mg, 75 %).

### Method C

**2m** were prepared according to the reported procedure<sup>[4]</sup>.

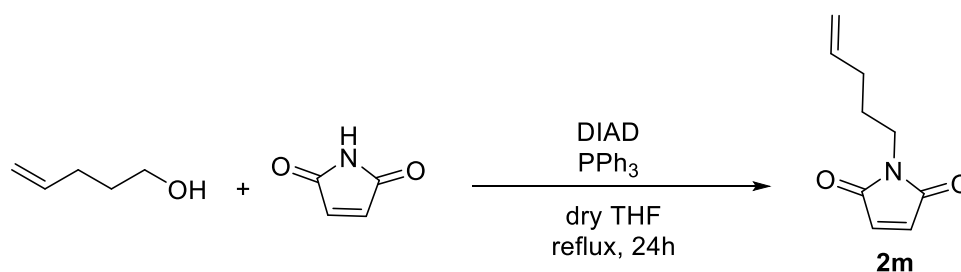

The maleimide (485 mg, 5.0 mmol) and PPh<sub>3</sub> (1.31 g, 5.0 mmol) were added in dry THF (20.0 mL) and dissolved in a 100 mL round bottom flask equipped with a magnetic stirring bar. Then, pent-4-en-1-ol (1.00 mL, 5.0 mmol) and diisopropylazodicarboxylate (DIAD) (0.50 mL, 5.0 mmol) were added. The flask was equipped with a condenser and the mixture was stirred for 24 h under reflux. The solvent was evaporated under reduced pressure. The residue was purified by column chromatography. (420mg, 49 %)

**Table S2** List of derivatives of Benzothiophenes and Benzofurans

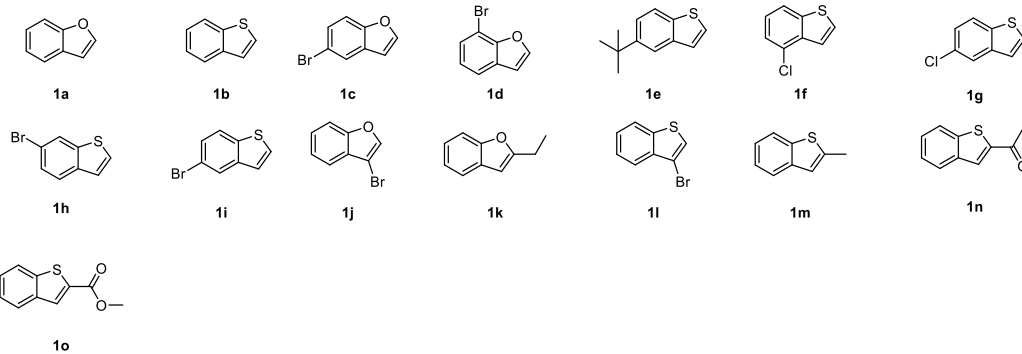

**1b-1o** were purchased from Titan and Bide.

**Table S3** List of unsuccessful substrates

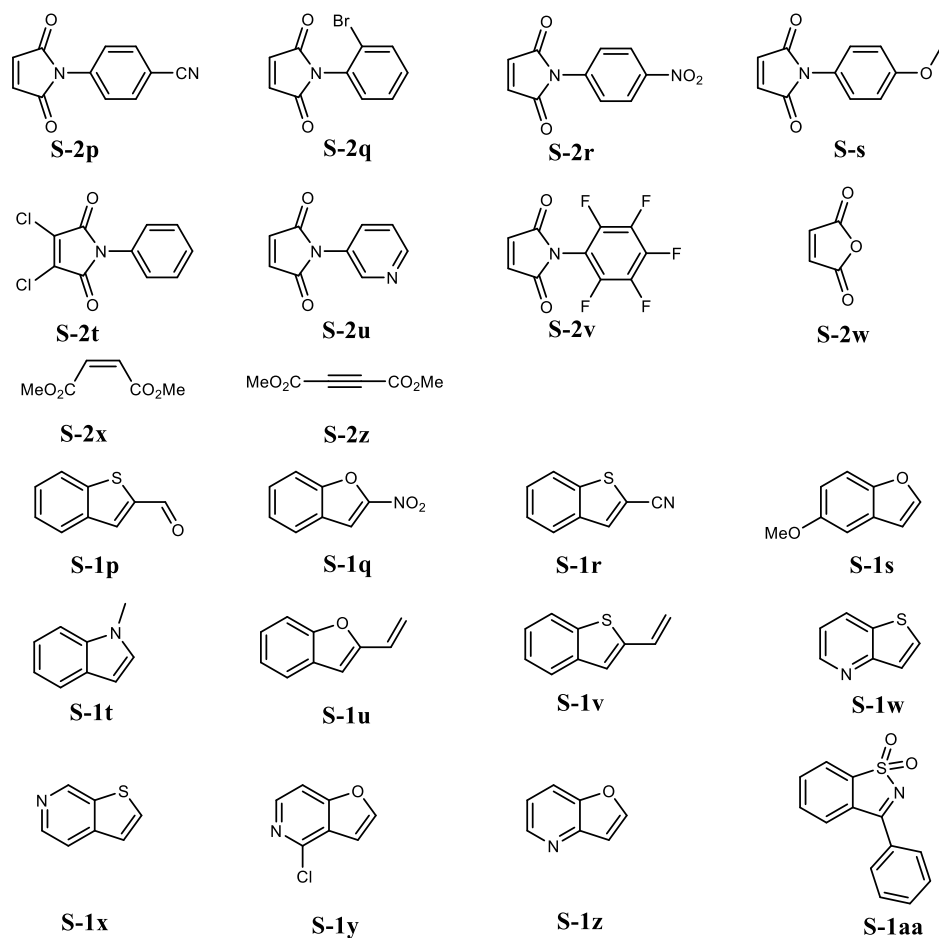

However, when moving to examine other *N*-substituted maleimides such as *N*-(4-nitrophenyl) maleimide, *N*-(pentafluorophenyl)maleimide, *N*-heteroarylmaleimides and *N*-alkyl substituted maleimides, these substrates were proved to be incompatible with this reaction which limited the application of catalytic systems to a certain extent. This table showcased substrates incompatible with our reaction protocol.

### 3.Optimization of the Reaction Conditions

**Table S4** Photosensitizer Screening

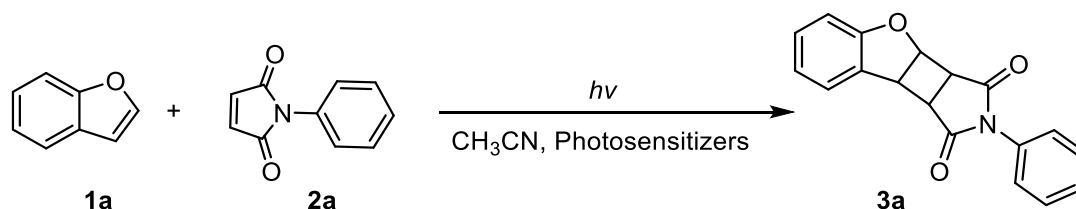

| Entry <sup>a</sup> | Photosensitizers | Yield(%) <sup>d</sup> | d.r. |
|--------------------|------------------|-----------------------|------|
| 1                  | MePPTNO          | 0                     | -    |
| 2                  | EosinY           | 0                     | -    |
| 3                  | BuPPTNO          | 0                     | -    |

|                |                                                                  |    |       |
|----------------|------------------------------------------------------------------|----|-------|
| 4              | <i>t</i> -BuPPTNO                                                | 0  | -     |
| 5              | 4CzIPN                                                           | 0  | -     |
| 6 <sup>b</sup> | Ir[dF(CF <sub>3</sub> )ppy] <sub>2</sub> (dtbbpy)PF <sub>6</sub> | 22 | 5.5:1 |
| 7 <sup>b</sup> | Ru(bpy) <sub>3</sub> Cl·6H <sub>2</sub> O                        | 0  | -     |
| 8 <sup>b</sup> | Ru(bpy) <sub>3</sub> (PF <sub>6</sub> ) <sub>2</sub>             | 0  | -     |
| 9 <sup>c</sup> | Thioxanthone                                                     | 40 | 3.4:1 |

<sup>a</sup>benzofuran **1a** (0.20 mmol), *N*-phenylmaleimide **2a** (0.20 mmol), and photosensitizer (5 mol%) in solvent (2 mL), irradiated with 450 nm LEDs under argon atmosphere at room temperature for 24 h. <sup>b</sup>Photosensitizer (1 mol%), irradiated with 450 nm LEDs. <sup>c</sup>Photosensitizer (30 mol%), irradiated with 390 nm LEDs. <sup>d</sup>Yield was determined by column chromatography.

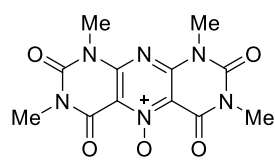

**MePPTNO**

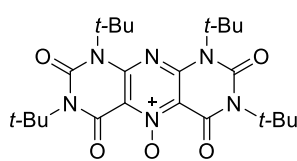

***t*-BuPPTNO**

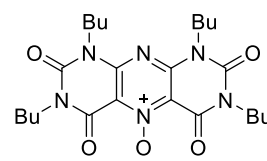

**BuPPTNO**

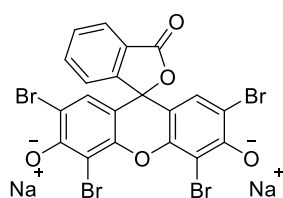

**Eosin Y**

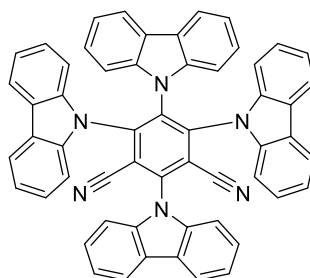

**4CzIPN**

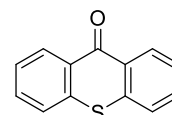

**Thioxanthone**

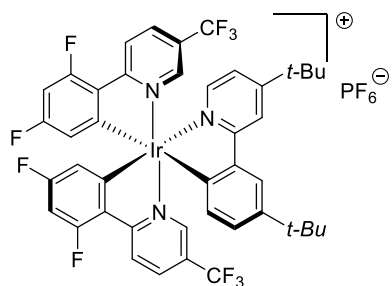

**Ir[dF(CF<sub>3</sub>)ppy]<sub>2</sub>(dtbbpy)PF<sub>6</sub>**

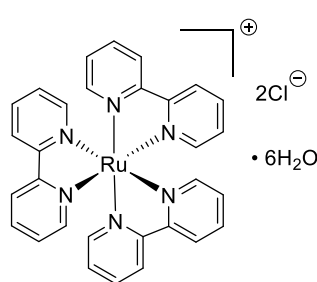

**Ru(bpy)<sub>3</sub>Cl<sub>2</sub>·6H<sub>2</sub>O**

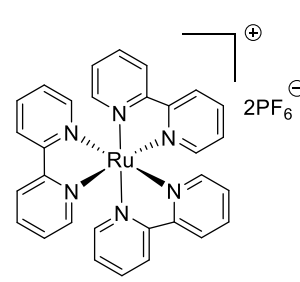

**Ru(bpy)<sub>3</sub>(PF<sub>6</sub>)<sub>2</sub>**

**Table S5 Solvent Screening**

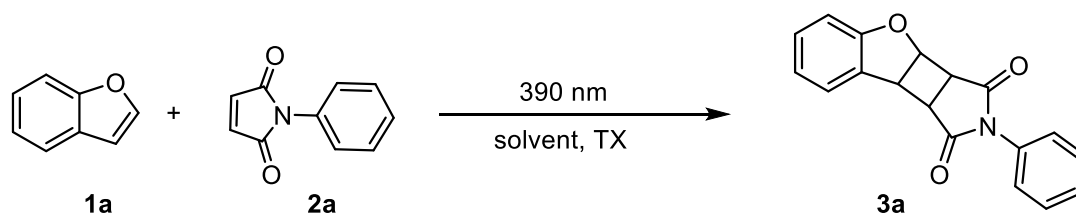

| Entry <sup>a</sup> | Solvent | Yield(%) <sup>c</sup> | d.r.  |
|--------------------|---------|-----------------------|-------|
| 1                  | MeCN    | 40                    | 3.4:1 |
| 2                  | DCM     | 44                    | 3:1   |

|   |                                    |    |       |
|---|------------------------------------|----|-------|
| 3 | DCE                                | 44 | 6:1   |
| 4 | THF                                | 0  | -     |
| 5 | DMSO                               | 20 | 2:1   |
| 6 | DMF                                | 10 | 2:1   |
| 7 | 1,4-Dioxane                        | 0  | -     |
| 8 | CF <sub>3</sub> CH <sub>2</sub> OH | 48 | 2.5:1 |

<sup>a</sup>benzofuran **1a** (0.20 mmol), *N*-phenylmaleimide **2a** (0.20 mmol), and photosensitizer (30 mol%) in solvent (2 mL), irradiated with 390 nm LEDs under argon atmosphere at room temperature for 24 h. <sup>b</sup>Yield was determined by column chromatography.

**Table S6** Additive Screening

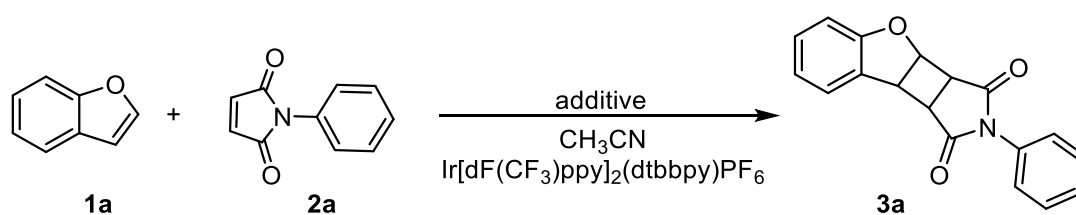

| Entry <sup>a</sup> | Additive                         | Yield(%) | d.r. |
|--------------------|----------------------------------|----------|------|
| 1                  | Na <sub>2</sub> HPO <sub>4</sub> | n.r      | -    |
| 2                  | Cs <sub>2</sub> CO <sub>3</sub>  | 0        | -    |
| 3                  | PivONa                           | n.r      | -    |
| 4                  | 2,6-Lutidine                     | n.r      | -    |
| 5                  | FeCl <sub>3</sub>                | n.r      | -    |
| 6 <sup>b</sup>     | TFA                              | 19       | 2:1  |
| 7                  | AcOH                             | 0        | -    |

<sup>a</sup>benzofuran **1a** (0.20 mmol), *N*-phenylmaleimide **2a** (0.20 mmol), additive (0.20 mmol) and photosensitizer (1 mol%) in solvent(2 mL), irradiated with 450 nm LEDs under argon atmosphere at room temperature for 24 h. <sup>b</sup>Yield was determined by <sup>1</sup>H-NMR, using internal standard (CH<sub>2</sub>Br<sub>2</sub>).

**Table S7** Ratio of substrate and Volume of solvent Screening

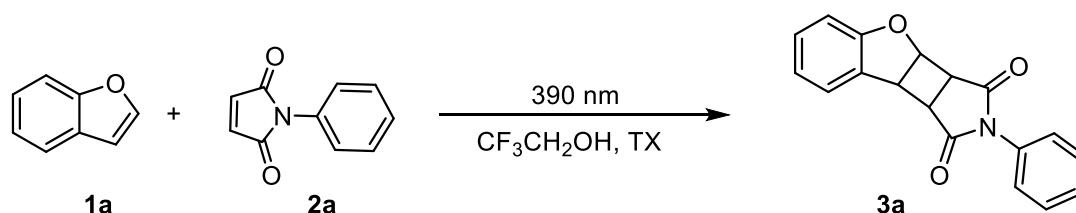

| Entry <sup>a</sup> | Ratio of substrate<br>( <b>1a</b> : <b>2a</b> ) | Volume of<br>solvent | Yield(%) <sup>c</sup> | d.r.  |
|--------------------|-------------------------------------------------|----------------------|-----------------------|-------|
| 1 <sup>b</sup>     | 0.20 mmol: 0.20 mmol                            | 2ml                  | 0                     | -     |
| 2                  | 0.20 mmol: 0.20 mmol                            | 2ml                  | 48                    | 2.5:1 |
| 3 <sup>d</sup>     | 0.20 mmol: 0.20 mmol                            | 4ml                  | 60                    | 2:1   |
| 4                  | 0.40 mmol: 0.20 mmol                            | 4ml                  | 84                    | 1.1:1 |



<sup>a</sup>benzofurans **1a**, *N*-phenylmaleimide **2a** and photosensitizer (30 mol%) in CF<sub>3</sub>CH<sub>2</sub>OH, irradiated with 390 nm LEDs under argon atmosphere at room temperature for 24 h. <sup>b</sup>photosensitizer (5 mol%). <sup>c</sup>Yield was determined by column chromatography. <sup>d</sup>Yield was determined by <sup>1</sup>H-NMR, using internal standard (CH<sub>2</sub>Br<sub>2</sub>).

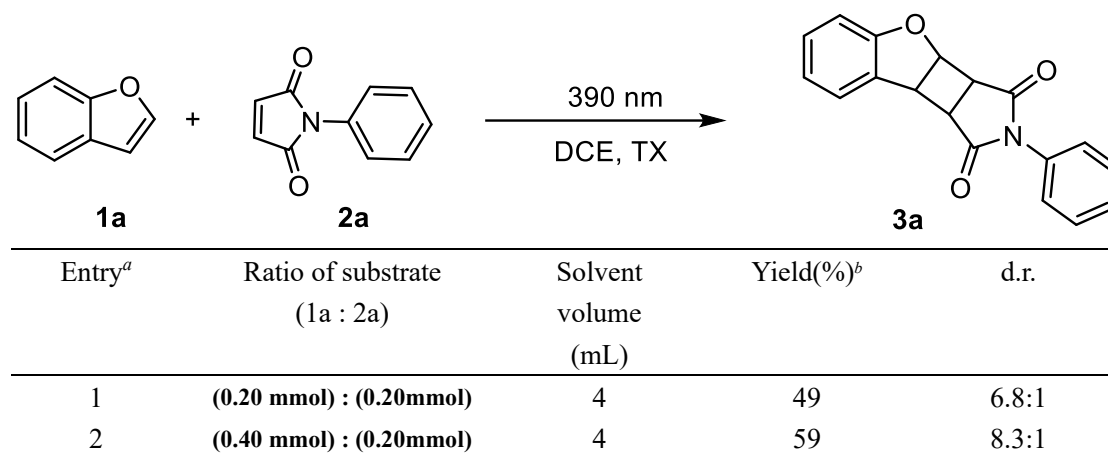

<sup>a</sup>benzofurans **1a**, *N*-phenylmaleimide **2a** and photosensitizer (30 mol%) in DCE, irradiated with 390 nm LEDs under argon atmosphere at room temperature for 24 h. <sup>b</sup>Yield was determined by column chromatography.

**Table S8** Control experiment

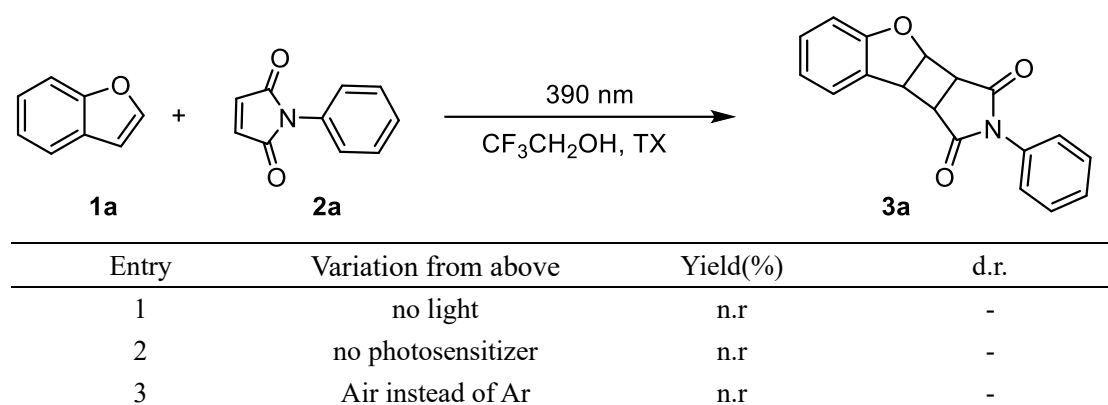

Reaction condition: benzofuran **1a** (0.40 mmol), *N*-phenylmaleimide **2a** (0.20 mmol) and photosensitizer (30 mol%) in CF<sub>3</sub>CH<sub>2</sub>OH (4 ml), irradiated with 390 nm LEDs under argon atmosphere at room temperature for 24 h.

## 4. Photosensitized Cycloadditions

### 4.1 General Procedures for [2+2] cycloaddition of Benzofuran or Benzothiophene Derivatives with Maleimides

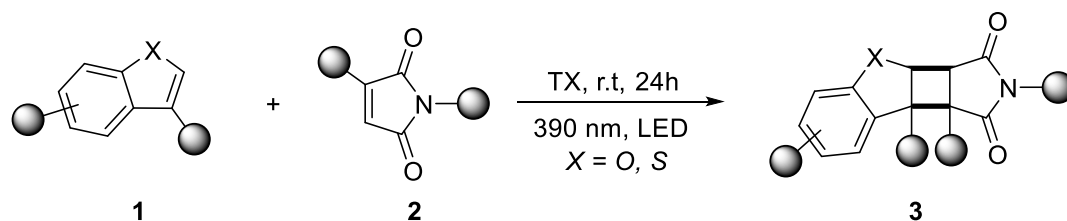

An oven-dried Schlenk tube (10 mL) containing a stirring bar was charged with the substrate **1** (0.4 mmol) and substrate **2** (0.2 mmol), TX (30 mol %). The Schlenk tube was then connected to a vacuum line where it was evacuated and back-filled with argon for 3 times, then add trifluoroethanol. Finally, the reaction mixture was placed at a distance of 2 ~ 3 cm from 390 nm LED and stirred at room temperature 24 h. Then, the mixture was concentrated in vacuo and purified by silica gel flash chromatography (petroleum ether/ethyl acetate 10/1 ~ 1/1 or petroleum ether /DCM 1/1) to afford the corresponding product.

#### 4.2 Reactor Set-Ups

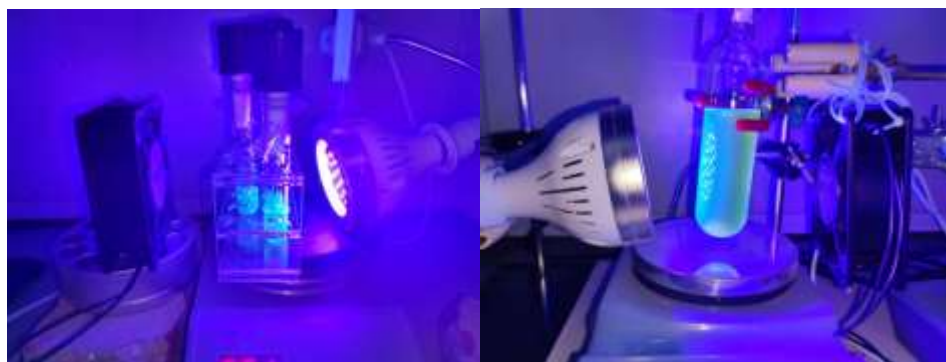

**Figure S1.** Reaction set up with a 30 W 390 nm LEDs (distance app. 2.0 cm from the bulb, left: model reaction; right: gram-scale reaction)

### 5. Characterization of compounds

**(3aR,3bR,8bS,8cR)-2-phenyl-3a,3b,8b,8c-tetrahydro-1H-benzofuro[2',3':3,4]cycobuta[1,2-c]pyrrole-1,3(2H)-dione (3a)**

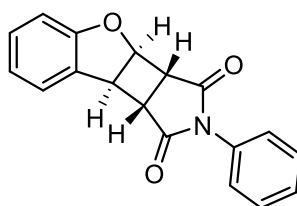

Yield: 24mg (41 %); white solid;  $R_f = 0.5$  (petroleum ether / dichloromethane, 1:1); mp 276 °C.  
 $^1\text{H NMR}$  (600 MHz, DMSO- $d_6$ )  $\delta$  7.47 – 7.42 (m, 2H), 7.40 – 7.35 (m, 1H), 7.35 – 7.30 (m, 3H), 7.19 – 7.17 (m, 1H), 6.94 – 6.86 (m, 2H), 5.40 (dd,  $J = 6.4, 2.2$  Hz, 1H), 4.29 – 4.23 (m, 1H), 3.58 (m, 1H), 3.35 (dd,  $J = 6.9, 2.5$  Hz, 1H).  
 $^{13}\text{C}\{^1\text{H}\}$  NMR (151 MHz, DMSO- $d_6$ )  $\delta$  176.5, 175.2, 160.3, 132.9, 129.9, 129.3, 128.9, 128.4, 127.7, 126.3, 122.3, 110.9, 82.4, 49.1, 46.4, 46.2.  
HRMS (ESI):  $m/z$ :  $[\text{M} + \text{Na}]^+$  Calcd. for  $\text{C}_{18}\text{H}_{13}\text{NO}_3\text{Na}^+$ : 314.0793; Found: 314.0798.

**(3a*R*,3b*S*,8b*R*,8c*R*)-2-phenyl-3a,3b,8b,8c-tetrahydro-1*H*-benzofuro[2',3':3,4]cycobuta[1,2-*c*]pyrrole-1,3(2*H*)-dione (3a')**

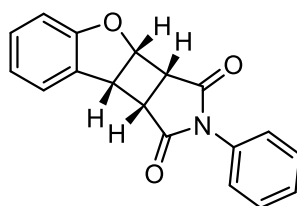

Yield: 25mg (43 %); white solid;  $R_f = 0.3$  (petroleum ether / dichloromethane, 1:1); mp 193 °C.  
 $^1\text{H NMR}$  (600 MHz,  $\text{CDCl}_3$ )  $\delta$  7.31 – 7.27 (m, 3H), 7.24 (m, 2H), 6.96 – 6.89 (m, 2H), 6.53 – 6.46 (m, 2H), 5.56 (m, 1H), 4.68 – 4.63 (m, 1H), 3.87 (m, 1H), 3.82 (m, 1H).  
 $^{13}\text{C}\{^1\text{H}\}$  NMR (151 MHz,  $\text{CDCl}_3$ )  $\delta$  175.4, 172.9, 161.8, 131.6, 130.1, 129.1, 128.8, 126.8, 126.49, 124.5, 122.1, 110.7, 77.4, 46.0, 45.4, 42.3.  
HRMS (ESI):  $m/z$ :  $[\text{M} + \text{Na}]^+$  Calcd. for  $\text{C}_{18}\text{H}_{13}\text{NO}_3\text{Na}^+$ : 314.0793; Found: 314.0798.

**(3a*R*,3b*R*,8b*S*,8c*R*)-2-(4-fluorophenyl)-3a,3b,8b,8c-tetrahydro-1*H*-benzofuro[2',3':3,4]cyclobuta[1,2-*c*]pyrrole-1,3(2*H*)-dione (3b)**

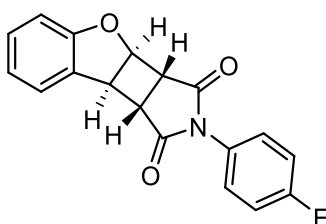

Yield: 34 mg (55 %); white solid;  $R_f = 0.5$  (petroleum ether / dichloromethane, 1:1); mp 269–271 °C.  
 $^1\text{H NMR}$  (600 MHz, DMSO- $d_6$ )  $\delta$  7.46 – 7.42 (m, 3H), 7.40 – 7.37 (m, 2H), 7.27 (t,  $J = 7.8$  Hz, 1H), 7.03 – 6.94 (m, 2H), 5.51 (d,  $J = 4.2$  Hz, 1H), 4.33 (d,  $J = 6.4$  Hz, 1H), 3.66 (d,  $J = 6.2$  Hz, 1H), 3.42 (dd,  $J = 6.8, 2.4$  Hz, 1H).  
 $^{13}\text{C}\{^1\text{H}\}$  NMR (151 MHz, DMSO- $d_6$ )  $\delta$  176.5, 175.2, 162.9, 161.2, 160.3, 129.9 (d,  $J = 9.5$  Hz), 129.1 (d,  $J = 3.0$  Hz), 128.4, 126.2, 122.3, 116.3 (d,  $J = 22.8$  Hz), 110.9, 82.4, 49.1, 46.4, 46.2.  
 $^{19}\text{F NMR}$  (565 MHz, DMSO- $d_6$ )  $\delta$  -112.98 – -113.04 (m).  
HRMS (ESI):  $m/z$ :  $[\text{M} + \text{Na}]^+$  Calcd. for  $\text{C}_{18}\text{H}_{13}\text{NO}_3\text{FNa}^+$ : 332.0706; Found: 332.0706.

**(3a*R*,3b*S*,8b*R*,8c*R*)-2-(4-fluorophenyl)-3a,3b,8b,8c-tetrahydro-1*H*-benzofuro[2',3':3,4]cyclobuta[1,2-*c*]pyrrole-1,3(2*H*)-dione (3b')**

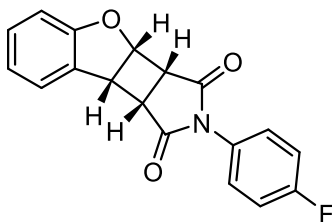

Yield: 25 mg (18 %); white solid;  $R_f$  = 0.3 (petroleum ether / dichloromethane, 1:1); mp 208–210 °C.

$^1\text{H NMR}$  (600 MHz,  $\text{CDCl}_3$ )  $\delta$  7.23 – 7.25 (m, 2H), 7.00 – 6.88 (m, 4H), 6.50 – 6.40 (m, 2H), 5.56 (t,  $J$  = 7.4 Hz, 1H), 4.66 (t,  $J$  = 6.8 Hz, 1H), 3.88 – 3.86 (m, 1H), 3.83 – 3.81 (m, 1H).

$^{13}\text{C}\{^1\text{H}\}$  NMR (151 MHz,  $\text{CDCl}_3$ )  $\delta$  175.3, 172.8, 163.2, 161.7, 130.2, 128.4 (d,  $J$  = 8.9 Hz), 127.4 (d,  $J$  = 3.2 Hz), 126.8, 124.4, 122.1, 116.1 (d,  $J$  = 22.8 Hz), 110.7, 46.0, 45.4, 42.3.

$^{19}\text{F NMR}$  (565 MHz,  $\text{CDCl}_3$ )  $\delta$  -107.7 – -124.1 (m).

HRMS (ESI):  $m/z$ :  $[\text{M} + \text{H}]^+$  Calcd. for  $\text{C}_{18}\text{H}_{14}\text{NO}_3\text{F}^+$ : 310.0879; Found: 310.0880.

**(3a*R*,3b*R*,8b*S*,8c*R*)-2-(4-bromophenyl)-3a,3b,8b,8c-tetrahydro-1*H*-benzofuro[2',3':3,4]cyclobuta[1,2-*c*]pyrrole-1,3(2*H*)-dione (3c)**

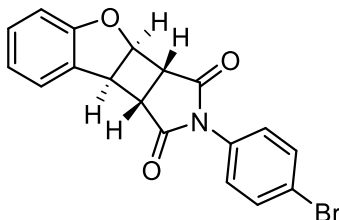

Yield: 28.8 mg (39 %); white solid;  $R_f$  = 0.5 (petroleum ether / dichloromethane, 1:1); mp 250°C.

$^1\text{H NMR}$  (600 MHz,  $\text{DMSO-}d_6$ )  $\delta$  7.76 – 7.74 (m, 2H), 7.40 (d,  $J$  = 7.4 Hz, 1H), 7.38 – 7.36 (m, 2H), 7.28 – 7.25 (m, 1H), 6.79 – 7.01 (m, 2H), 5.50 (dd,  $J$  = 6.4, 2.3 Hz, 1H), 4.30 (dd,  $J$  = 4.8, 1.6 Hz, 1H), 3.67 – 3.65 (m, 1H), 3.40 (dd,  $J$  = 6.9, 2.5 Hz, 1H).

$^{13}\text{C}\{^1\text{H}\}$  NMR (151 MHz,  $\text{DMSO-}d_6$ )  $\delta$  176.2, 175.0, 160.3, 132.4, 132.2, 129.9, 129.8, 128.4, 126.2, 122.3, 122.0, 110.9, 82.4, 49.1, 46.4, 46.2.

HRMS (ESI):  $m/z$ :  $[\text{M} + \text{Na}]^+$  Calcd. for  $\text{C}_{18}\text{H}_{12}\text{NO}_3\text{BrNa}^+$ : 391.9898; Found: 391.9899.

**(3a*R*,3b*S*,8b*R*,8c*R*)-2-(4-bromophenyl)-3a,3b,8b,8c-tetrahydro-1*H*-benzofuro[2',3':3,4]cyclobuta[1,2-*c*]pyrrole-1,3(2*H*)-dione (3c')**

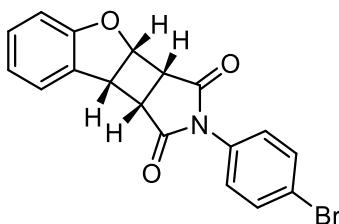

Yield: 23.9 mg (32 %); white solid;  $R_f$  = 0.4 (petroleum ether / dichloromethane, 1:1); mp 178 °C.  
 $^1\text{H NMR}$  (600 MHz,  $\text{CDCl}_3$ )  $\delta$  7.44 – 7.40 (m, 2H), 7.22 – 7.24 (m, 2H), 6.96 – 6.87 (m, 2H), 6.42 – 6.34 (m, 2H), 5.59 – 5.56 (m, 1H), 4.71 – 4.64 (m, 1H), 3.90 – 3.87 (m, 1H), 3.85 – 3.82 (m, 1H).

$^{13}\text{C}\{^1\text{H}\}$  NMR (151 MHz,  $\text{CDCl}_3$ )  $\delta$  175.0, 172.4, 161.7, 132.3, 130.5, 130.2, 128.0, 126.8, 124.3, 122.8, 122.1, 110.7, 77.4, 46.0, 45.5, 42.3.

HRMS (ESI):  $m/z$ :  $[\text{M} + \text{Na}]^+$  Calcd. for  $\text{C}_{18}\text{H}_{12}\text{NO}_3\text{BrNa}^+$ : 391.9898; Found: 391.9906.

**(3aR,3bR,8bS,8cR)-2-(4-(trifluoromethoxy)phenyl)-3a,3b,8b,8c-tetrahydro-1H-benzofuro[2',3':3,4]cyclobuta[1,2-c]pyrrole-1,3(2H)-dione (3d)**

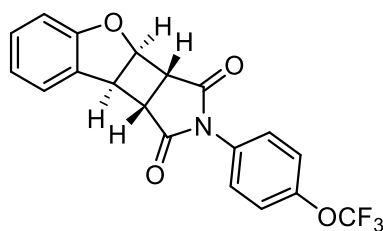

Yield: 26mg (35 %); white solid;  $R_f$  = 0.4 (petroleum ether / dichloromethane, 1:1); mp 223 °C.  
 $^1\text{H NMR}$  (600 MHz,  $\text{CDCl}_3$ )  $\delta$  7.46 – 7.42 (m, 2H), 7.40 (d,  $J$  = 7.5 Hz, 1H), 7.37 – 7.36 (m, 2H), 7.29 – 7.27 (m, 1H), 7.03 – 7.01 (m, 1H), 6.96 (d,  $J$  = 8.1 Hz, 1H), 5.36 (dd,  $J$  = 6.4, 2.1 Hz, 1H), 4.38 (d,  $J$  = 6.3 Hz, 1H), 3.75 – 3.73 (m, 1H), 3.50 (dd,  $J$  = 6.8, 2.5 Hz, 1H).

$^{13}\text{C}\{^1\text{H}\}$  NMR (151 MHz,  $\text{CDCl}_3$ )  $\delta$  175.7, 174.2, 160.0, 149.0, 130.1, 130.0, 127.8, 126.9, 125.6, 122.3, 121.7, 120.4 (d,  $J$  = 258.7 Hz), 111.0, 82.5, 48.8, 47.2, 46.0.

$^{19}\text{F NMR}$  (565 MHz,  $\text{DMSO}-d_6$ )  $\delta$  -56.85.

HRMS (ESI):  $m/z$ :  $[\text{M} + \text{Na}]^+$  Calcd. for  $\text{C}_{19}\text{H}_{12}\text{NO}_4\text{F}_3\text{Na}^+$ : 398.0616; Found: 398.0620.

**(3aR,3bS,8bR,8cR)-2-(4-(trifluoromethoxy)phenyl)-3a,3b,8b,8c-tetrahydro-1H-benzofuro[2',3':3,4]cyclobuta[1,2-c]pyrrole-1,3(2H)-dione (3d')**

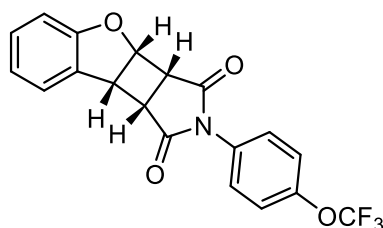

Yield: 10 mg (13 %); white solid;  $R_f$  = 0.4 (petroleum ether / dichloromethane, 1:1); mp 182 °C.

<sup>1</sup>H NMR (600 MHz, CDCl<sub>3</sub>) δ 7.28 – 7.24 (m, 2H), 7.16 (d, *J* = 8.3 Hz, 2H), 6.98 – 6.96 (m, 1H), 6.93 (d, *J* = 8.3 Hz, 1H), 6.58 – 6.55 (m, 2H), 5.60 (t, *J* = 7.4 Hz, 1H), 4.70 (t, *J* = 8.9 Hz, 1H), 3.93 – 3.90 (m, 1H), 3.87 – 3.85 (m, 1H).

<sup>13</sup>C{<sup>1</sup>H} NMR (151 MHz, CDCl<sub>3</sub>) δ 175.0, 172.4, 161.8, 149.0, 130.2, 130.0, 128.0, 126.8, 124.4, 122.1, 121.4, 120.3 (d, *J* = 258.0 Hz), 110.7, 77.4, 46.0, 45.5, 42.3.

<sup>19</sup>F NMR (565 MHz, CDCl<sub>3</sub>) δ -57.88.

HRMS (ESI): *m/z*: [M + Na]<sup>+</sup> Calcd. for C<sub>19</sub>H<sub>12</sub>NO<sub>4</sub>F<sub>3</sub>Na<sup>+</sup>: 398.0616; Found: 398.0624.

**(3a*R*,3b*R*,8b*S*,8c*R*)-2-(*p*-tolyl)-3a,3b,8b,8c-tetrahydro-1*H*-benzofuro[2',3':3,4]cyclobuta[1,2-*c*]pyrrole-1,3(2*H*)-dione (3e)**

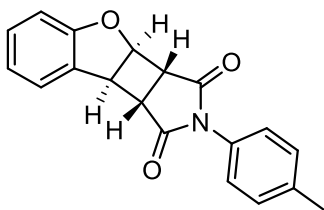

Yield: 15.3mg (25 %); white solid; *R*<sub>f</sub> = 0.5 (petroleum ether / dichloromethane, 1:1); mp 250 °C.

<sup>1</sup>H NMR (600 MHz, CDCl<sub>3</sub>) δ 7.39 (d, *J* = 7.5 Hz, 1H), 7.33 – 7.30 (m, 2H), 7.27 (dd, *J* = 7.9, 1.4 Hz, 1H), 7.23 – 7.20 (m, 2H), 7.02 – 6.99 (M, 1H), 6.95 (d, *J* = 8.1 Hz, 1H), 5.36 (dd, *J* = 6.4, 2.1 Hz, 1H), (d, *J* = 6.4 Hz, 1H), 3.72 – 3.70 (m, 1H), 3.50 – 3.46 (m, 1H), 2.41 (s, 3H).

<sup>13</sup>C{<sup>1</sup>H} NMR (151 MHz, CDCl<sub>3</sub>) δ 176.1, 174.6, 160.1, 139.1, 130.0, 130.0, 129.1, 127.1, 126.2, 125.6, 122.2, 111.0, 82.6, 48.8, 47.2, 46.0, 21.3.

HRMS (ESI): *m/z*: [M + Na]<sup>+</sup> Calcd. for C<sub>19</sub>H<sub>15</sub>NO<sub>3</sub>Na<sup>+</sup>: 328.0950; Found: 328.0951.

**(3a*R*,3b*S*,8b*R*,8c*R*)-2-(*p*-tolyl)-3a,3b,8b,8c-tetrahydro-1*H*-benzofuro[2',3':3,4]cyclobuta[1,2-*c*]pyrrole-1,3(2*H*)-dione (3e')**

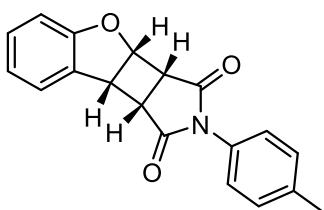

Yield: 20.1mg (33 %); pale yellow solid; *R*<sub>f</sub> = 0.3 (petroleum ether / dichloromethane, 1:1); mp 184 °C.

<sup>1</sup>H NMR (600 MHz, CDCl<sub>3</sub>) δ 7.25 – 7.21 (m, 2H), 7.08 (d, *J* = 8.1 Hz, 2H), 6.95 – 6.86 (m, 2H), 6.40 – 6.35 (m, 2H), 5.54 (t, *J* = 7.5 Hz, 1H), 4.64 (t, *J* = 6.9 Hz, 1H), 3.86 – 3.83 (m, 1H), 3.80 – 3.78 (m, 1H), 2.28 (s, 3H).

<sup>13</sup>C{<sup>1</sup>H} NMR (151 MHz, CDCl<sub>3</sub>) δ 175.5, 173.0, 161.8, 138.9, 130.1, 129.8, 128.9, 126.8, 126.2, 124.5, 122.0, 110.7, 46.0, 45.4, 42.3, 21.2.

HRMS (ESI):  $m/z$ :  $[M + Na]^+$  Calcd. for  $C_{19}H_{15}NO_3Na^+$ : 328.0950; Found: 328.0958.

**methyl 4-((3a*R*,3b*R*,8b*S*,8c*R*)-1,3-dioxo-1,3,3a,3b,8b,8c-hexahydro-2*H*-benzofuro[2',3':3,4]cyclobuta[1,2-*c*]pyrrol-2-yl)benzoate (3f)**

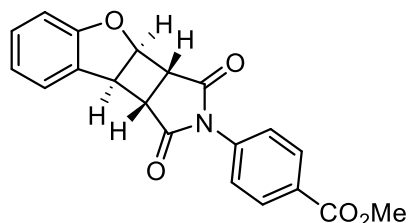

Yield: 8mg (10 %); white solid;  $R_f$  = 0.5 (petroleum ether / ethyl acetate, 5:1); mp 248 °C.

$^1H$  NMR (600 MHz,  $CDCl_3$ )  $\delta$  8.19 (d,  $J$  = 8.5 Hz, 2H), 7.49 (d,  $J$  = 8.5 Hz, 2H), 7.40 (d,  $J$  = 7.4 Hz, 1H), 7.28 (t,  $J$  = 8.0 Hz, 1H), 7.02 (t,  $J$  = 7.4 Hz, 1H), 6.96 (d,  $J$  = 8.1 Hz, 1H), 5.37 (dd,  $J$  = 6.3, 2.1 Hz, 1H), 4.38 (d,  $J$  = 5.5 Hz, 1H), 3.95 (s, 3H), 3.74 (d,  $J$  = 6.8 Hz, 1H), 3.51 (dd,  $J$  = 6.8, 2.5 Hz, 1H).

$^{13}C\{^1H\}$  NMR (151 MHz,  $CDCl_3$ )  $\delta$  175.5, 174.0, 166.1, 160.0, 135.7, 130.6, 130.3, 130.0, 126.9, 126.1, 125.6, 122.3, 111.0, 82.5, 52.4, 48.8, 47.3, 46.0.

HRMS (ESI):  $m/z$ :  $[M + Na]^+$  Calcd. for  $C_{20}H_{15}NO_5Na^+$ : 372.0850; Found: 372.0848.

**methyl 4-((3a*R*,3b*S*,8b*R*,8c*R*)-1,3-dioxo-1,3,3a,3b,8b,8c-hexahydro-2*H*-benzofuro[2',3':3,4]cyclobuta[1,2-*c*]pyrrol-2-yl)benzoate (3f')**

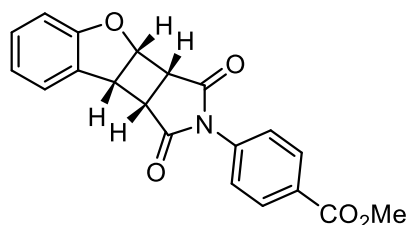

Yield: 17mg (23 %); white solid;  $R_f$  = 0.5 (petroleum ether / ethyl acetate, 5:1); mp 182 °C.

$^1H$  NMR (600 MHz,  $CDCl_3$ )  $\delta$  7.90 (d,  $J$  = 8.4 Hz, 2H), 7.19 – 7.14 (m, 2H), 6.89 – 6.81 (m, 2H), 6.55 (d,  $J$  = 8.4 Hz, 2H), 5.52 (t,  $J$  = 7.4 Hz, 1H), 4.62 (t,  $J$  = 7.8 Hz, 1H), 3.85 – 3.81 (m, 4H), 3.80 – 3.76 (m, 1H).

$^{13}C\{^1H\}$  NMR (151 MHz,  $CDCl_3$ )  $\delta$  174.9, 172.3, 166.1, 161.7, 135.6, 130.4, 130.2, 126.8, 126.3, 124.3, 122.1, 110.8, 52.3, 46.1, 45.5, 42.4.

HRMS (ESI):  $m/z$ :  $[M + Na]^+$  Calcd. for  $C_{20}H_{15}NO_5Na^+$ : 372.0855; Found: 372.0848.

**(3a*S*,3b*R*,8b*S*,8c*R*)-2-phenyl-3a,3b,8b,8c-tetrahydro-1*H*-benzo[4',5']thieno[2',3':3,4]cyclobuta[1,2-*c*]pyrrole-1,3(2*H*)-dione (3g)**

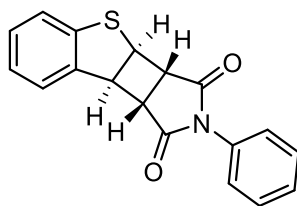

Yield: 22mg (35 %); white solid;  $R_f$  = 0.5 (petroleum ether / ethyl acetate,5:1); mp 188 °C  
 $^1\text{H NMR}$  (600 MHz,  $\text{CDCl}_3$ )  $\delta$  7.53 (t,  $J$  = 7.8 Hz, 2H), 7.44 (t,  $J$  = 7.4 Hz, 1H), 7.38 – 7.32 (m, 3H), 7.27 – 7.23 (m, 2H), 7.16 – 7.14 (m, 1H), 4.62 (dd,  $J$  = 8.2, 3.1 Hz, 1H), 4.54 (dd,  $J$  = 8.1, 3.6 Hz, 1H), 3.69 (dd,  $J$  = 6.3, 3.0 Hz, 1H), 3.53 (dd,  $J$  = 6.9, 3.2 Hz, 1H).  
 $^{13}\text{C}\{^1\text{H}\}$  NMR (151 MHz,  $\text{CDCl}_3$ )  $\delta$  176.0, 175.6, 141.5, 138.6, 131.8, 129.3, 129.2, 128.9, 126.4, 125.5, 125.2, 122.1, 52.9, 50.0, 48.2, 47.8.  
 HRMS (ESI):  $m/z$ :  $[\text{M} + \text{Na}]^+$  Calcd. for  $\text{C}_{18}\text{H}_{13}\text{NO}_2\text{SNa}^+$ : 330.0565; Found: 330.0567.

**(3aS,3bS,8bR,8cR)-2-phenyl-3a,3b,8b,8c-tetrahydro-1H-benzo[4',5']thieno[2',3':3,4]cyclobuta[1,2-c]pyrrole-1,3(2H)-dione (3g')**

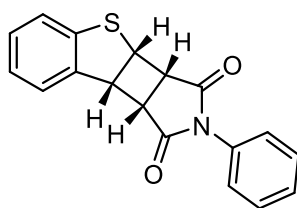

Yield: 31mg (51 %); pale yellow solid;  $R_f$  = 0.5 (petroleum ether / ethyl acetate,2:1); mp 178 °C.  
 $^1\text{H NMR}$  (600 MHz,  $\text{CDCl}_3$ )  $\delta$  7.26 – 7.20 (m, 3H), 7.15 – 7.08 (m, 3H), 6.99 (t,  $J$  = 7.0 Hz, 1H), 6.55 – 6.53 (m, 2H), 4.88 (t,  $J$  = 9.1 Hz, 2H), 4.81 (t,  $J$  = 9.0 Hz, 2H), 3.88 (dd,  $J$  = 9.1, 6.8 Hz, 1H), 3.76 – 3.73 (m, 1H).  
 $^{13}\text{C}\{^1\text{H}\}$  NMR (151 MHz,  $\text{CDCl}_3$ )  $\delta$  175.1, 174.5, 143.3, 135.9, 131.7, 129.2, 129.1, 128.8, 126.7, 126.5, 125.0, 122.0, 51.0, 45.8, 45.3, 44.7.  
 HRMS (ESI):  $m/z$ :  $[\text{M} + \text{Na}]^+$  Calcd. for  $\text{C}_{18}\text{H}_{13}\text{NO}_2\text{SNa}^+$ : 330.0565; Found: 330.0571.

**(3aS,3bR,8bS,8cR)-2-(4-(trifluoromethyl)phenyl)-3a,3b,8b,8c-tetrahydro-1H-benzo[4',5']thieno[2',3':3,4]cyclobuta[1,2-c]pyrrole-1,3(2H)-dione (3h)**

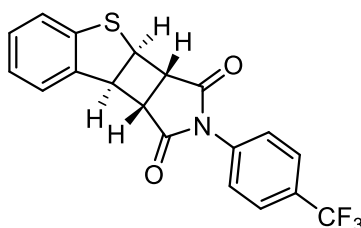

Yield: 30mg (40 %); white solid;  $R_f$  = 0.5 (petroleum ether / ethyl acetate, 5:1); mp 202 °C.



<sup>1</sup>H NMR (600 MHz, CDCl<sub>3</sub>) δ 7.72 (d, *J* = 8.5 Hz, 1H), 7.48 (d, *J* = 8.3 Hz, 2H), 7.27 (d, *J* = 8.5, 1H), 7.21 – 7.16 (m, 2H), 7.10 – 7.07 (m, 1H), 4.57–4.55 (m, 1H), 4.49–4.47 (m, 1H), 3.65–3.63 (m, 1H), 3.49–3.47 (m, 1H).

<sup>13</sup>C{<sup>1</sup>H} NMR (151 MHz, CDCl<sub>3</sub>) δ 175.6, 175.1, 141.4, 138.4, 134.8, 130.8 (d, *J* = 32.9 Hz), 129.3, 126.6, 126.4 (q, *J* = 3.7 Hz), 125.6, 125.2, 123.6 (d, *J* = 272.5 Hz), 52.9, 50.0, 48.1, 47.8.

<sup>19</sup>F NMR (565 MHz, CDCl<sub>3</sub>) δ -62.76, 50.0, 48.0, 47.8.

HRMS (ESI): *m/z*: [M + Na]<sup>+</sup> Calcd. for C<sub>19</sub>H<sub>12</sub>NO<sub>2</sub>F<sub>3</sub>SNa<sup>+</sup>: 398.0439; Found: 398.0429.

**(3a*S*,3b*S*,8b*R*,8c*R*)-2-(4-(trifluoromethyl)phenyl)-3a,3b,8b,8c-tetrahydro-1*H*-benzo[4',5']thieno[2',3':3,4]cyclobuta[1,2-*c*]pyrrole-1,3(2*H*)-dione (3h')**

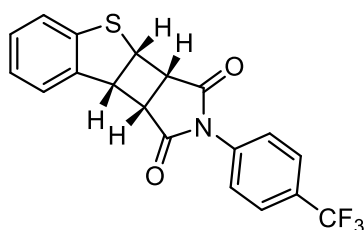

Yield: 12mg (16 %); yellow solid; *R*<sub>f</sub> = 0.5 (petroleum ether / ethyl acetate, 2:1); mp 176 °C.

<sup>1</sup>H NMR (600 MHz, CDCl<sub>3</sub>) δ 7.51 (d, *J* = 8.4 Hz, 2H), 7.16 – 7.08 (m, 3H), 7.02 – 6.99 (m, 1H), 6.72 (d, *J* = 7.9 Hz, 2H), 4.94 (t, *J* = 9.1 Hz, 1H), 4.86 (t, *J* = 8.7 Hz, 1H), 3.96– 3.93 (m, 1H), 3.82– 3.79 (m, 1H).

<sup>13</sup>C{<sup>1</sup>H} NMR (151 MHz, CDCl<sub>3</sub>) δ 174.6, 173.9, 143.2, 135.7, 134.7, 130.7 (d, *J* = 32.7 Hz), 129.3, 126.8, 126.8, 126.2 (q, *J* = 3.8 Hz), 125.1, 123.6 (d, *J* = 272.4 Hz), 122.02, 51.1, 45.9, 45.4, 44.7.

<sup>19</sup>F NMR (565 MHz, CDCl<sub>3</sub>) δ -62.84.

HRMS (ESI): *m/z*: [M + Na]<sup>+</sup> Calcd. for C<sub>19</sub>H<sub>12</sub>NO<sub>2</sub>F<sub>3</sub>SNa<sup>+</sup>: 398.0439; Found: 398.0447.

**(3a*S*,3b*R*,8b*S*,8c*R*)-2-methyl-3a,3b,8b,8c-tetrahydro-1*H*-benzo[4',5']thieno[2',3':3,4]cyclobuta[1,2-*c*]pyrrole-1,3(2*H*)-dione (3i)**

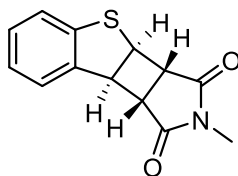

Yield: 16mg (33 %); white solid; *R*<sub>f</sub> = 0.5 (petroleum ether / ethyl acetate, 5:1); mp 194 °C.

<sup>1</sup>H NMR (600 MHz, CDCl<sub>3</sub>) δ 7.30 (d, *J* = 8.2 Hz, 1H), 7.25 – 7.19 (m, 2H), 7.14 – 7.11 (m, 1H), 4.47 (dd, *J* = 8.2, 3.1 Hz, 1H), 4.38 – 4.36 (m, 1H), 3.55 – 3.53 (m, 1H), 3.38 (dd, *J* = 6.8, 3.2 Hz, 1H), 3.10 (s, 3H).

$^{13}\text{C}\{^1\text{H}\}$  NMR (151 MHz,  $\text{CDCl}_3$ )  $\delta$  177.1, 176.6, 141.5, 138.7, 129.1, 125.4, 125.1, 122.1, 52.54, 50.1, 48.2, 47.5, 25.4.

HRMS (ESI):  $m/z$ :  $[\text{M} + \text{Na}]^+$  Calcd. for  $\text{C}_{13}\text{H}_{11}\text{NO}_2\text{SNa}^+$ : 268.0408; Found: 268.0417.

**(3a*S*,3b*S*,8b*R*,8c*R*)-2-methyl-3a,3b,8b,8c-tetrahydro-1*H*-benzo[4',5']thieno[2',3':3,4]cyclobuta[1,2-*c*]pyrrole-1,3(2*H*)-dione (3i')**

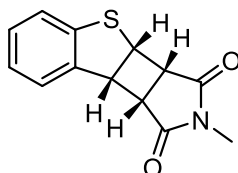

Yield: 10mg (20 %); pale yellow solid;  $R_f$  = 0.5 (petroleum ether / ethyl acetate, 2:1); mp 144 °C.

$^1\text{H}$  NMR (600 MHz,  $\text{CDCl}_3$ )  $\delta$  7.14 – 7.11 (m, 3H), 7.04 – 7.00 (m, 1H), 4.88 (t,  $J$  = 9.2 Hz, 1H), 4.82 (t,  $J$  = 9.0 Hz, 1H), 3.86 – 3.80 (m, 1H), 3.72 – 3.67 (m, 1H), 2.67 (s, 3H).

$^{13}\text{C}\{^1\text{H}\}$  NMR (151 MHz,  $\text{CDCl}_3$ )  $\delta$  175.9, 175.5, 142.9, 135.8, 129.0, 126.3, 124.8, 121.8, 50.6, 45.6, 45.4, 44.4, 24.5.

HRMS (ESI):  $m/z$ :  $[\text{M} + \text{Na}]^+$  Calcd. for  $\text{C}_{13}\text{H}_{11}\text{NO}_2\text{SNa}^+$ : 268.0408; Found: 268.0414.

**(3a*S*,3b*R*,8b*S*,8c*R*)-2-benzyl-3a,3b,8b,8c-tetrahydro-1*H*-benzo[4',5']thieno[2',3':3,4]cyclobuta[1,2-*c*]pyrrole-1,3(2*H*)-dione (3j)**

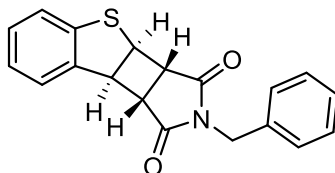

Yield: 31mg (48 %); white solid;  $R_f$  = 0.5 (petroleum ether / ethyl acetate, 10:1); mp 196 °C.

$^1\text{H}$  NMR (600 MHz,  $\text{CDCl}_3$ )  $\delta$  7.37 – 7.32 (m, 2H), 7.29 – 7.19 (m, 4H), 7.17 – 7.10 (m, 2H), 7.05 – 7.03 (m, 1H), 4.67 (s, 2H), 4.34 (dd,  $J$  = 8.1, 3.1 Hz, 1H), 4.24 – 4.22 (m, 1H), 3.46 – 3.44 (m, 1H), 3.29 – 3.27 (m, 1H).

$^{13}\text{C}\{^1\text{H}\}$  NMR (151 MHz,  $\text{CDCl}_3$ )  $\delta$  176.7, 176.2, 141.5, 138.7, 135.6, 129.1, 128.8, 128.7, 128.2, 125.4, 125.1, 122.1, 52.6, 50.0, 48.2, 47.5, 42.8.

HRMS (ESI):  $m/z$ :  $[\text{M} + \text{Na}]^+$  Calcd. for  $\text{C}_{19}\text{H}_{15}\text{N}_2\text{SNa}^+$ : 344.0721; Found: 344.0728.

**(3a*S*,3b*S*,8b*R*,8c*R*)-2-benzyl-3a,3b,8b,8c-tetrahydro-1*H*-benzo[4',5']thieno[2',3':3,4]cyclobuta[1,2-*c*]pyrrole-1,3(2*H*)-dione (3j')**

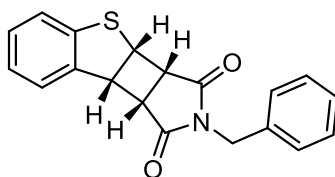

Yield: 5mg (8 %); pale yellow solid;  $R_f$  = 0.5 (petroleum ether / ethyl acetate, 2:1); mp 180 °C.  
 $^1\text{H NMR}$  (600 MHz,  $\text{CDCl}_3$ )  $\delta$  7.11 – 7.07 (m, 3H), 7.02 (d,  $J$  = 7.5 Hz, 1H), 7.01 – 6.97 (m, 2H), 6.92 (t,  $J$  = 7.5 Hz, 1H), 6.87 (t,  $J$  = 7.6 Hz, 1H), 6.76 (d,  $J$  = 7.7 Hz, 1H), 4.79 (t,  $J$  = 9.2 Hz, 1H), 4.72 (t,  $J$  = 9.0 Hz, 1H), 4.36 – 4.28 (m, 2H), 3.74 – 3.72 (m, 1H), 3.62 (t,  $J$  = 7.9 Hz, 1H).

$^{13}\text{C}\{^1\text{H}\}$  NMR (151 MHz,  $\text{CDCl}_3$ )  $\delta$  175.7, 175.3, 143.0, 135.34, 135.2, 129.0, 128.7, 128.5, 127.5, 126.1, 124.6, 121.8, 50.5, 45.4, 45.0, 44.4, 42.5.

HRMS (ESI):  $m/z$ :  $[\text{M} + \text{Na}]^+$  Calcd. for  $\text{C}_{19}\text{H}_{15}\text{N}_2\text{SNa}^+$ : 344.0721; Found: 344.0729.

**(3aS,3bR,8bS,8cR)-2-cyclohexyl-3a,3b,8b,8c-tetrahydro-1H-benzo[4',5']thieno[2',3':3,4]cyclobuta[1,2-c]pyrrole-1,3(2H)-dione (3k)**

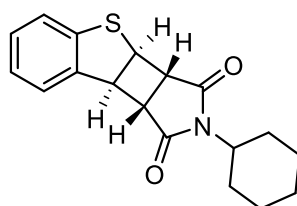

Yield: 30mg (52 %); white solid;  $R_f$  = 0.4 (petroleum ether / ethyl acetate, 5:1); mp 130 °C.

$^1\text{H NMR}$  (600 MHz,  $\text{CDCl}_3$ )  $\delta$  7.29 (d,  $J$  = 7.6 Hz, 1H), 7.24 – 7.18 (m, 2H), 7.13 – 7.10 (m, 1H), 4.42 (dd,  $J$  = 8.1, 3.1 Hz, 1H), 4.32 (dd,  $J$  = 8.0, 3.5 Hz, 1H), 4.06 – 3.99 (m, 1H), 3.44 – 3.42 (m, 1H), 3.27 (dd,  $J$  = 6.8, 3.1 Hz, 1H), 2.26 – 2.16 (m, 2H), 1.87 (d,  $J$  = 13.3 Hz, 1H), 1.72 – 1.67 (m, 1H), 1.67 – 1.62 (m, 2H), 1.39 – 1.31 (m, 2H), 1.30 – 1.21 (m, 2H).

$^{13}\text{C}\{^1\text{H}\}$  NMR (151 MHz,  $\text{CDCl}_3$ )  $\delta$  177.3, 176.8, 141.6, 138.9, 129.0, 125.3, 125.1, 122.0, 52.8, 52.1, 49.6, 47.8, 28.7, 28.6, 25.8, 25.0.

HRMS (ESI):  $m/z$ :  $[\text{M} + \text{Na}]^+$  Calcd. for  $\text{C}_{18}\text{H}_{19}\text{NO}_2\text{SNa}^+$ : 336.1034; Found: 336.1038.

**(3aS,3bS,8bR,8cR)-2-cyclohexyl-3a,3b,8b,8c-tetrahydro-1H-benzo[4',5']thieno[2',3':3,4]cyclobuta[1,2-c]pyrrole-1,3(2H)-dione (3k')**

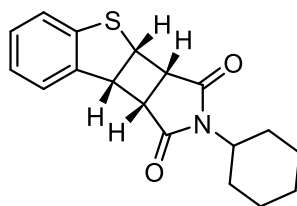

Yield: 5mg (9 %); white solid;  $R_f$  = 0.5 (petroleum ether / ethyl acetate, 2:1); mp 176 °C.  
 $^1\text{H NMR}$  (600 MHz,  $\text{CDCl}_3$ )  $\delta$  7.15 – 7.07 (m, 3H), 7.03 – 7.02 (m, 1H), 4.87 (t,  $J$  = 9.1 Hz, 1H), 4.80 (t,  $J$  = 9.0 Hz, 1H), 3.75 – 3.68 (m, 2H), 3.61 – 3.59 (m, 1H), 1.95 – 1.88 (m, 1H), 1.71 – 1.62 (m, 3H), 1.55 – 1.50 (m, 1H), 1.18 – 1.02 (m, 4H), 0.93 (d,  $J$  = 11.5 Hz, 1H).  
 $^{13}\text{C}\{^1\text{H}\}$  NMR (151 MHz,  $\text{CDCl}_3$ )  $\delta$  176.1, 175.5, 143.5, 135.8, 128.9, 126.6, 124.7, 121.7, 51.8, 50.8, 45.0, 44.7, 44.4, 28.2, 27.6, 25.7, 25.7, 24.9.  
HRMS (ESI):  $m/z$ :  $[\text{M} + \text{Na}]^+$  Calcd. for  $\text{C}_{18}\text{H}_{19}\text{NO}_2\text{SNa}^+$ : 336.1034; Found: 336.1042.

**(3a*S*,3b*R*,8b*S*,8c*R*)-3a,3b,8b,8c-tetrahydro-1*H*-benzo[4',5']thieno[2',3':3,4]cyclobuta[1,2-*c*]pyrrole-1,3(2*H*)-dione (3l)**

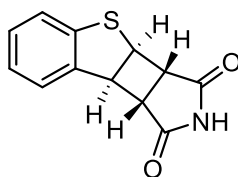

Yield: 26mg (56 %); white solid;  $R_f$  = 0.5 (petroleum ether / ethyl acetate, 2:1); mp 190 °C.  
 $^1\text{H NMR}$  (600 MHz,  $\text{CDCl}_3$ )  $\delta$  8.34 (s, 1H), 7.29 – 7.20 (m, 4H), 7.13 (t,  $J$  = 7.3 Hz, 1H), 4.56 (dd,  $J$  = 8.1, 3.2 Hz, 1H), 4.49 (dd,  $J$  = 8.1, 3.6 Hz, 1H), 3.56 (dd,  $J$  = 7.0, 3.7 Hz, 1H), 3.41 (dd,  $J$  = 6.7, 3.2 Hz, 1H).  
 $^{13}\text{C}\{^1\text{H}\}$  NMR (151 MHz,  $\text{CDCl}_3$ )  $\delta$  176.0, 176.3, 141.3, 138.6, 129.2, 125.5, 125.1, 122.1, 52.6, 51.5, 49.6, 47.5.  
HRMS (ESI):  $m/z$ :  $[\text{M} + \text{Na}]^+$  Calcd. for  $\text{C}_{12}\text{H}_9\text{NO}_2\text{SNa}^+$ : 254.0252; Found: 254.0249.

**(3a*S*,3b*R*,8b*S*,8c*R*)-2-(pent-4-en-1-yl)-3a,3b,8b,8c-tetrahydro-1*H*-benzo[4',5']thieno[2',3':3,4]cyclobuta[1,2-*c*]pyrrole-1,3(2*H*)-dione (3m)**

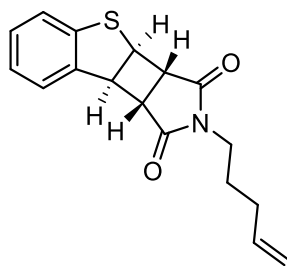

Yield: 20mg (34 %); colorless oil;  $R_f$  = 0.5 (petroleum ether / ethyl acetate, 10:1).  
 $^1\text{H NMR}$  (600 MHz,  $\text{CDCl}_3$ )  $\delta$  7.29 (d,  $J$  = 7.6 Hz, 1H), 7.25 – 7.19 (m, 2H), 7.13 – 7.11 (m, 1H), 5.86 – 5.78 (m, 1H), 5.09 – 5.05 (m, 1H), 5.02 – 5.00 (m, 1H), 4.45 (dd,  $J$  = 8.2, 3.2 Hz, 1H), 4.35 (dd,  $J$  = 8.1, 3.6 Hz, 1H), 3.60 – 3.59 (m, 2H), 3.52 – 3.50 (m, 1H), 3.34 (dd,  $J$  = 6.7, 3.2 Hz, 1H), 2.15 – 2.07 (m, 2H), 1.77 – 1.72 (m, 2H).

$^{13}\text{C}\{^1\text{H}\}$  NMR (151 MHz,  $\text{CDCl}_3$ )  $\delta$  177.0, 176.6, 141.5, 138.8, 137.1, 129.1, 125.4, 125.1, 122.0, 115.6, 52.6, 49.9, 48.1, 47.6, 38.8, 31.0, 26.7.

HRMS (ESI):  $m/z$ :  $[\text{M} + \text{Na}]^+$  Calcd. for  $\text{C}_{17}\text{H}_{17}\text{NO}_2\text{SNa}^+$ : 322.0878; Found: 322.0880.

**(3a*S*,3b*S*,8b*R*,8c*R*)-2-(pent-4-en-1-yl)-3a,3b,8b,8c-tetrahydro-1*H*-benzo[4',5']thieno[2',3':3,4]cyclobuta[1,2-*c*]pyrrole-1,3(2*H*)-dione (3m')**

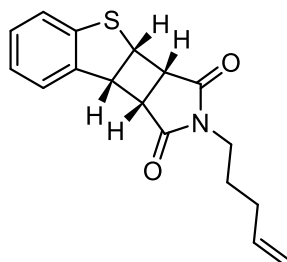

Yield: 10mg (17 %); colorless oil;  $R_f$  = 0.5 (petroleum ether / ethyl acetate, 2:1).

$^1\text{H}$  NMR (600 MHz,  $\text{CDCl}_3$ )  $\delta$  7.16 – 7.06 (m, 3H), 7.03 – 7.01 (m, 1H), 5.67 – 5.60 (m, 1H), 4.96 – 4.87 (m, 3H), 4.82 (t,  $J$  = 9.0 Hz, 1H), 3.82 – 3.79 (m, 1H), 3.68 – 3.65 (m, 1H), 3.32 – 3.18 (m, 2H), 1.81 – 1.78 (m, 2H), 1.16 – 1.09 (m, 1H), 0.98 – 0.92 (m, 1H).

$^{13}\text{C}\{^1\text{H}\}$  NMR (151 MHz,  $\text{CDCl}_3$ )  $\delta$  175.9, 175.3, 143.4, 137.3, 135.7, 129.0, 126.5, 124.8, 121.8, 115.0, 50.7, 45.5, 45.1, 44.3, 38.4, 30.8, 26.1.

HRMS (ESI):  $m/z$ :  $[\text{M} + \text{Na}]^+$  Calcd. for  $\text{C}_{17}\text{H}_{17}\text{NO}_2\text{SNa}^+$ : 322.0878; Found: 322.0886.

**(3a*S*,3b*R*,8b*S*,8c*R*)-3a-methoxy-2-phenyl-3a,3b,8b,8c-tetrahydro-1*H*-benzofuro[2',3':3,4]cyclobuta[1,2-*c*]pyrrole-1,3(2*H*)-dione (3n)**

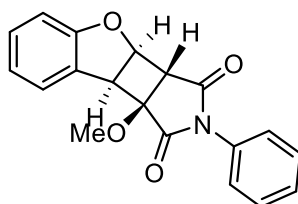

Yield: 44mg (68 %); white solid;  $R_f$  = 0.5 (petroleum ether / ethyl acetate, 5:1); mp 196 °C.

$^1\text{H}$  NMR (600 MHz,  $\text{CDCl}_3$ )  $\delta$  7.57 – 7.53 (m, 2H), 7.50 – 7.46 (m, 1H), 7.42 (d,  $J$  = 7.5 Hz, 1H), 7.37 – 7.35 (m, 2H), 7.32 – 7.29 (m, 1H), 7.05 – 7.03 (m, 1H), 6.97 (d,  $J$  = 8.1 Hz, 1H), 5.11 (dd,  $J$  = 6.1, 2.1 Hz, 1H), 4.59 (d,  $J$  = 6.0 Hz, 1H), 3.60 (dd,  $J$  = 1.9, 1.4 Hz, 1H), 3.38 (s, 3H).

$^{13}\text{C}\{^1\text{H}\}$  NMR (151 MHz,  $\text{CDCl}_3$ )  $\delta$  175.3, 172.4, 160.4, 131.3, 130.0, 129.4, 129.1, 128.2, 126.30, 122.5, 121.8, 110.9, 77.3, 53.3, 52.0, 51.0.

HRMS (ESI):  $m/z$ :  $[\text{M} + \text{Na}]^+$  Calcd. for  $\text{C}_{19}\text{H}_{15}\text{NO}_4\text{Na}^+$ : 344.0899 ; Found: 344.0904.

**(3a*S*,3b*R*,8b*S*,8c*S*)-3a-bromo-2-phenyl-3a,3b,8b,8c-tetrahydro-1*H*-benzofuro[2',3':3,4]cyclobuta[1,2-*c*]pyrrole-1,3(2*H*)-dione (3o)**

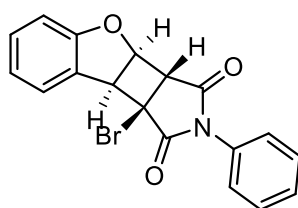

Yield: 43mg (58 %); white solid;  $R_f$  = 0.5 (petroleum ether / ethyl acetate, 10:1); mp 160 °C.  
 $^1\text{H NMR}$  (600 MHz,  $\text{CDCl}_3$ )  $\delta$  7.55 – 7.50 (m, 2H), 7.48 – 7.44 (m, 1H), 7.41 – 7.32 (m, 4H), 7.09 – 7.07 (m, 1H), 7.00 (d,  $J$  = 8.1 Hz, 3H), 5.34 (dd,  $J$  = 5.9, 2.3 Hz, 1H), 4.55 (d,  $J$  = 5.2 Hz, 1H), 3.80 (dd,  $J$  = 2.3, 1.5 Hz, 1H).  
 $^{13}\text{C}\{^1\text{H}\}$  NMR (151 MHz,  $\text{CDCl}_3$ )  $\delta$  173.6, 171.3, 160.3, 131.3, 130.7, 129.4, 129.3, 128.2, 126.3, 124.2, 122.0, 111.2, 80.4, 58.5, 53.0, 53.0.  
 HRMS (ESI):  $m/z$ :  $[\text{M} + \text{Na}]^+$  Calcd. for  $\text{C}_{18}\text{H}_{12}\text{NO}_3\text{BrNa}^+$ : 391.9898; Found: 391.9903.

**(3aR,3bR,8bS,8cR)-7-bromo-2-phenyl-3a,3b,8b,8c-tetrahydro-1H-benzofuro[2',3':3,4]cyclobuta[1,2-c]pyrrole-1,3(2H)-dione (3aa)**

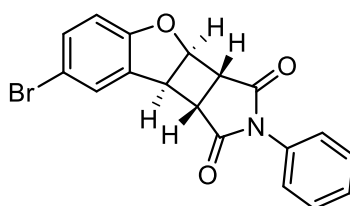

Yield: 22mg (31 %); white solid;  $R_f$  = 0.4 (petroleum ether / dichloromethane, 1:1); mp 212 °C.  
 $^1\text{H NMR}$  (600 MHz,  $\text{CDCl}_3$ )  $\delta$  7.52 – 7.49 (m, 3H), 7.45 – 7.42 (m, 1H), 7.38 – 7.33 (m, 3H), 6.83 (d,  $J$  = 8.5 Hz, 1H), 5.37 (dd,  $J$  = 6.3, 2.1 Hz, 1H), 4.34 (d,  $J$  = 6.4 Hz, 1H), 3.72 – 3.70 (m, 1H), 3.48 (dd,  $J$  = 6.8, 2.5 Hz, 1H).  
 $^{13}\text{C}\{^1\text{H}\}$  NMR (151 MHz,  $\text{CDCl}_3$ )  $\delta$  175.5, 174.1, 159.3, 132.8, 131.6, 129.4, 129.3, 129.0, 128.5, 126.3, 113.9, 112.5, 83.2, 48.7, 47.0, 45.9.  
 HRMS (ESI):  $m/z$ :  $[\text{M} + \text{Na}]^+$  Calcd. for  $\text{C}_{18}\text{H}_{12}\text{NO}_3\text{BrNa}^+$ : 391.9898; Found: 391.9895.

**(3aR,3bS,8bR,8cR)-7-bromo-2-phenyl-3a,3b,8b,8c-tetrahydro-1H-benzofuro[2',3':3,4]cyclobuta[1,2-c]pyrrole-1,3(2H)-dione (3aa')**

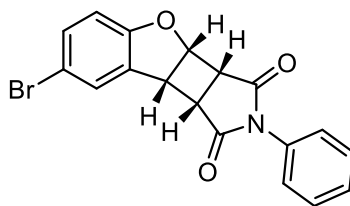

Yield: 32mg (43 %); white solid;  $R_f$  = 0.5 (petroleum ether / ethyl acetate, 2:1); mp 202 °C.  
 $^1\text{H NMR}$  (600 MHz,  $\text{CDCl}_3$ )  $\delta$  7.36 – 7.32 (m, 5H), 6.78 (d,  $J$  = 8.5 Hz, 1H), 6.60 – 6.58 (m, 2H), 5.57 (t,  $J$  = 7.4 Hz, 1H), 4.62 (t,  $J$  = 7.9 Hz, 1H), 3.89 – 3.86 (m, 1H), 3.82 – 3.80 (m, 1H).  
 $^{13}\text{C}\{^1\text{H}\}$  NMR (151 MHz,  $\text{CDCl}_3$ )  $\delta$  174.9, 172.5, 161.0, 133.0, 131.5, 129.6, 129.2, 129.0, 126.9, 126.3, 113.8, 112.2, 78.2, 46.0, 45.2, 42.3.  
 HRMS (ESI):  $m/z$ :  $[\text{M} + \text{Na}]^+$  Calcd. for  $\text{C}_{18}\text{H}_{12}\text{NO}_3\text{BrNa}^+$ : 391.9898; Found: 391.9901.

**(3aR,3bR,8bS,8cR)-5-bromo-2-phenyl-3a,3b,8b,8c-tetrahydro-1H-benzofuro[2',3':3,4]cyclobuta[1,2-c]pyrrole-1,3(2H)-dione (3ab)**

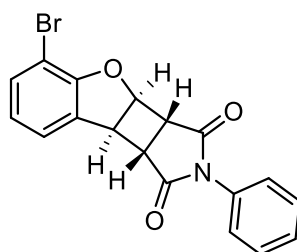

Yield: 7mg (10 %); white solid;  $R_f$  = 0.5 (petroleum ether / dichloromethane, 1:1); mp 238 °C.  
 $^1\text{H NMR}$  (600 MHz,  $\text{DMSO-}d_6$ )  $\delta$  7.55 – 7.52 (m, 1H), 7.50 – 7.42 (m, 3H), 7.40 – 7.38 (m, 2H), 6.95 (t,  $J$  = 7.7 Hz, 4H), 5.60 (dd,  $J$  = 6.4, 2.2 Hz, 1H), 4.45 (d,  $J$  = 6.3 Hz, 1H), 3.76 – 3.74 (m, 1H), 3.48 (dd,  $J$  = 7.0, 2.6 Hz, 1H).  
 $^{13}\text{C}\{^1\text{H}\}$  NMR (151 MHz,  $\text{DMSO-}d_6$ )  $\delta$  176.2, 174.9, 157.6, 132.9, 132.7, 130.2, 129.3, 129.0, 127.6, 125.6, 124.0, 102.9, 82.8, 49.0, 47.2, 46.3.  
 HRMS (ESI):  $m/z$ :  $[\text{M} + \text{Na}]^+$  Calcd. for  $\text{C}_{18}\text{H}_{12}\text{NO}_3\text{BrNa}^+$ : 391.9898; Found: 391.9902.

**(3aR,3bS,8bR,8cR)-5-bromo-2-phenyl-3a,3b,8b,8c-tetrahydro-1H-benzofuro[2',3':3,4]cyclobuta[1,2-c]pyrrole-1,3(2H)-dione (3ab')**

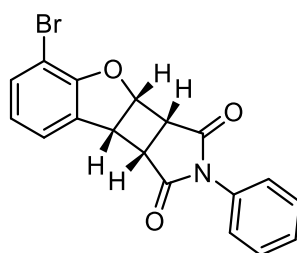

Yield: 30mg (41 %); white solid;  $R_f$  = 0.3 (petroleum ether / dichloromethane, 1:1); mp 256 °C.

$^1\text{H NMR}$  (600 MHz,  $\text{DMSO-}d_6$ )  $\delta$  7.44 (d,  $J$  = 7.0 Hz, 1H), 7.37 – 7.33 (m, 3H), 7.14 – 7.13 (m, 1H), 6.85 (t,  $J$  = 7.7 Hz, 1H), 6.55 – 6.53 (m, 2H), 5.69 – 5.66 (m, 1H), 4.79 – 4.73 (m, 1H), 3.97 – 3.94 (m, 1H), 3.88 – 3.85 (m, 1H).

$^{13}\text{C}\{^1\text{H}\}$  NMR (151 MHz,  $\text{DMSO-}d_6$ )  $\delta$  175.74, 173.29, 159.13, 132.67, 132.64, 129.28, 128.91, 127.92, 127.05, 126.33, 123.51, 102.46, 78.53, 46.52, 45.57, 43.28.

HRMS (ESI):  $m/z$ :  $[\text{M} + \text{Na}]^+$  Calcd. for  $\text{C}_{18}\text{H}_{12}\text{NO}_3\text{BrNa}^+$ : 391.9898; Found: 391.9902.

**(3a*S*,3b*R*,8b*S*,8c*R*)-7-(tert-butyl)-2-phenyl-3a,3b,8b,8c-tetrahydro-1*H*-benzo[4',5']thieno[2',3':3,4]cyclobuta[1,2-*c*]pyrrole-1,3(2*H*)-dione (3ac)**

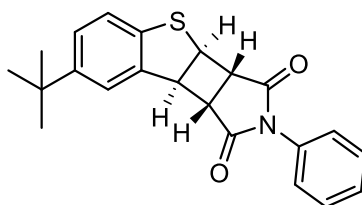

Yield: 13mg (18 %); white solid;  $R_f$  = 0.5 (petroleum ether / ethyl acetate, 5:1); mp 149 °C

$^1\text{H NMR}$  (600 MHz,  $\text{CDCl}_3$ )  $\delta$  7.54 – 7.50 (m, 2H), 7.46 – 7.43 (m, 1H), 7.38 – 7.35 (m, 3H), 7.30 (dd,  $J$  = 8.3, 1.4 Hz, 1H), 7.16 (d,  $J$  = 8.3 Hz, 1H), 4.60 (dd,  $J$  = 8.3, 3.0 Hz, 1H), 4.55 – 4.53 (m, 1H), 3.70 – 3.68 (m, 1H), 3.56 – 3.54 (m, 1H), 1.32 (s, 12H).

$^{13}\text{C}\{^1\text{H}\}$  NMR (151 MHz,  $\text{CDCl}_3$ )  $\delta$  176.3, 175.7, 149.2, 138.6, 138.0, 131.8, 129.3, 128.9, 126.6, 126.4, 122.2, 121.6, 53.0, 50.1, 48.2, 48.2, 34.6, 31.5.

HRMS (ESI):  $m/z$ :  $[\text{M} + \text{Na}]^+$  Calcd. for  $\text{C}_{22}\text{H}_{21}\text{NO}_2\text{SNa}^+$ : 386.1191; Found: 386.1196.

**(3a*S*,3b*S*,8b*R*,8c*R*)-7-(tert-butyl)-2-phenyl-3a,3b,8b,8c-tetrahydro-1*H*-benzo[4',5']thieno[2',3':3,4]cyclobuta[1,2-*c*]pyrrole-1,3(2*H*)-dione (3ac')**

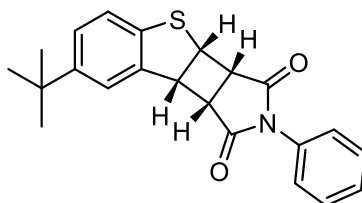

Yield: 27mg (37 %); white solid;  $R_f$  = 0.5 (petroleum ether / ethyl acetate, 5:1); mp 116 °C.

$^1\text{H NMR}$  (600 MHz,  $\text{CDCl}_3$ )  $\delta$  7.28 – 7.25 (m, 5H), 7.23 (dd,  $J$  = 2.0, 0.9 Hz, 1H), 7.11 (d,  $J$  = 8.2 Hz, 1H), 6.49 – 6.47 (m, 2H), 4.95 (t,  $J$  = 8.5 Hz, 1H), 4.89 (t,  $J$  = 8.9 Hz, 1H), 4.01 – 3.98 (m, 1H), 3.81 – 3.78 (m, 1H), 1.25 (s, 12H).



$^{13}\text{C}\{^1\text{H}\}$  NMR (151 MHz,  $\text{CDCl}_3$ )  $\delta$ 175.2, 174.3, 148.4, 139.8, 136.0, 131.7, 129.0, 128.7, 126.6, 126.4, 124.1, 121.7, 51.4, 45.9, 45.4, 45.0, 34.5, 31.3, 28.4.

HRMS (ESI):  $m/z$ :  $[\text{M} + \text{Na}]^+$  Calcd. for  $\text{C}_{22}\text{H}_{21}\text{NO}_2\text{SNa}^+$ : 386.1191; Found: 386.1198.

**(3a*S*,3b*R*,8b*S*,8c*R*)-8-chloro-2-phenyl-3a,3b,8b,8c-tetrahydro-1*H*-benzo[4',5']thieno[2',3':3,4]cyclobuta[1,2-*c*]pyrrole-1,3(2*H*)-dione (3ad)**

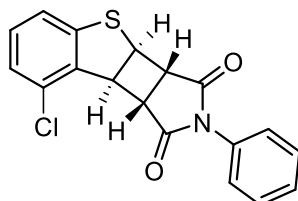

Yield: 14mg (21 %); white solid;  $R_f$  = 0.5 (petroleum ether / dichloromethane, 1:1); mp 192 °C.

$^1\text{H}$  NMR (600 MHz,  $\text{CDCl}_3$ )  $\delta$  7.55 – 7.53 (m, 2H), 7.46 (t,  $J$  = 7.5 Hz, 1H), 7.40 – 7.38 (m, 2H), 7.23 (t,  $J$  = 7.8 Hz, 1H), 7.14 (d,  $J$  = 8.2 Hz, 2H), 4.74 (dd,  $J$  = 8.2, 3.1 Hz, 1H), 4.57 (dd,  $J$  = 8.2, 3.6 Hz, 1H), 3.76 – 3.74 (m, 1H), 3.63 (dd,  $J$  = 6.7, 3.1 Hz, 1H).

$^{13}\text{C}\{^1\text{H}\}$  NMR (151 MHz,  $\text{CDCl}_3$ )  $\delta$ 175.4, 175.2, 143.5, 136.4, 131.9, 131.8, 130.8, 129.3, 128.9, 126.3, 125.6, 120.4, 52.9, 50.1, 47.1, 46.9.

HRMS (ESI):  $m/z$ :  $[\text{M} + \text{Na}]^+$  Calcd. for  $\text{C}_{18}\text{H}_{12}\text{NO}_2\text{SClNa}^+$ : 364.0175; Found: 364.0179.

**(3a*S*,3b*S*,8b*R*,8c*R*)-8-chloro-2-phenyl-3a,3b,8b,8c-tetrahydro-1*H*-benzo[4',5']thieno[2',3':3,4]cyclobuta[1,2-*c*]pyrrole-1,3(2*H*)-dione (3ad')**

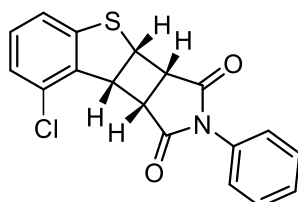

Yield: 42mg (62 %); white solid;  $R_f$  = 0.5 (petroleum ether / ethyl acetate, 2:1); mp 188 °C.

$^1\text{H}$  NMR (600 MHz,  $\text{CDCl}_3$ )  $\delta$  7.36 – 7.30 (m, 3H), 7.14 – 7.11 (m, 1H), 7.04 (d,  $J$  = 7.9 Hz, 2H), 6.86 (d,  $J$  = 7.3 Hz, 2H), 5.10 (t,  $J$  = 9.3 Hz, 1H), 4.92 (t,  $J$  = 8.8 Hz, 1H), 4.03 – 3.98 (m, 1H), 3.93 – 3.91 (m, 1H).

$^{13}\text{C}\{^1\text{H}\}$  NMR (151 MHz,  $\text{CDCl}_3$ )  $\delta$ 174.5, 174.4, 145.2, 134.7, 132.6, 131.8, 130.8, 129.1, 128.7, 126.4, 125.5, 119.7, 50.6, 45.8, 45.1, 44.5.

HRMS (ESI):  $m/z$ :  $[\text{M} + \text{Na}]^+$  Calcd. for  $\text{C}_{18}\text{H}_{12}\text{NO}_2\text{SClNa}^+$ : 364.0175; Found: 364.0183.

**(3a*S*,3b*R*,8b*S*,8c*R*)-7-chloro-2-phenyl-3a,3b,8b,8c-tetrahydro-1*H*-benzo[4',5']thieno[2',3':3,4]cyclobuta[1,2-*c*]pyrrole-1,3(2*H*)-dione (3ae)**

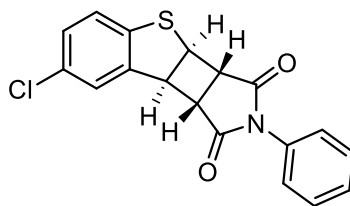

Yield: 16mg (23 %); white solid;  $R_f$  = 0.5 (petroleum ether / ethyl acetate, 2:1); mp 221 °C.  
 $^1\text{H NMR}$  (600 MHz,  $\text{CDCl}_3$ )  $\delta$  7.55 – 7.51 (m, 2H), 7.46 – 7.43 (m, 1H), 7.37 – 7.34 (m, 2H), 7.32 (d,  $J$  = 2.1 Hz, 1H), 7.23 (dd,  $J$  = 8.4, 2.1 Hz, 1H), 7.15 (d,  $J$  = 8.4 Hz, 1H), 4.59 – 4.56 (m, 2H), 3.70 (dd,  $J$  = 6.9, 2.5 Hz, 1H), 3.53 (dd,  $J$  = 6.9, 2.3 Hz, 1H).  
 $^{13}\text{C}\{^1\text{H}\}$  NMR (151 MHz,  $\text{CDCl}_3$ )  $\delta$  175.6, 175.3, 140.5, 140.1, 131.7, 131.2, 129.4, 129.3, 129.0, 126.3, 125.4, 123.0, 52.6, 50.0, 48.4, 48.0.  
 HRMS (ESI):  $m/z$ :  $[\text{M} + \text{Na}]^+$  Calcd. for  $\text{C}_{18}\text{H}_{12}\text{NO}_2\text{SClNa}^+$ : 364.0175; Found: 364.0183.

**(3aS,3bS,8bR,8cR)-7-chloro-2-phenyl-3a,3b,8b,8c-tetrahydro-1H-benzo[4',5']thieno[2',3':3,4]cyclobuta[1,2-c]pyrrole-1,3(2H)-dione (3ae')**

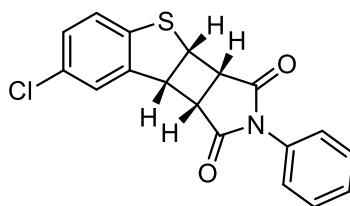

Yield: 25mg (37 %); white solid;  $R_f$  = 0.5 (petroleum ether / ethyl acetate, 5:1); mp 194 °C.  
 $^1\text{H NMR}$  (600 MHz,  $\text{CDCl}_3$ )  $\delta$  7.37 – 7.31 (m, 3H), 7.19 – 7.15 (m, 2H), 7.10 – 7.08 (m, 1H), 6.76 – 6.73 (m, 2H), 4.97 – 4.92 (m, 2H), 3.99 – 3.96 (m, 1H), 3.88 – 3.85 (m, 1H).  
 $^{13}\text{C}\{^1\text{H}\}$  NMR (151 MHz,  $\text{CDCl}_3$ )  $\delta$  174.6, 174.2, 142.0, 137.8, 131.6, 130.8, 129.3, 129.2, 128.9, 126.8, 126.3, 122.6, 50.7, 45.7, 45.5, 45.2.  
 HRMS (ESI):  $m/z$ :  $[\text{M} + \text{Na}]^+$  Calcd. for  $\text{C}_{18}\text{H}_{12}\text{NO}_2\text{SClNa}^+$ : 364.0175; Found: 364.0182.

**(3aR,3bR,8bS,8cR)-6-bromo-2-phenyl-3a,3b,8b,8c-tetrahydro-1H-benzofuro[2',3':3,4]cyclobuta[1,2-c]pyrrole-1,3(2H)-dione (3af)**

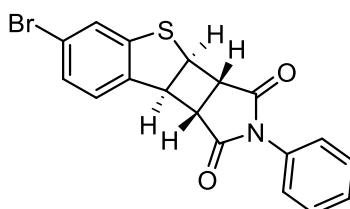

Yield: 17mg (19 %); white solid;  $R_f$  = 0.5 (petroleum ether / ethyl acetate, 5:1); mp 224 °C.

**<sup>1</sup>H NMR** (600 MHz, CDCl<sub>3</sub>) δ 7.56 – 7.53 (m, 2H), 7.48 – 7.45 (m, 1H), 7.40 – 7.35 (m, 3H), 7.30 – 7.27 (m, 2H), 7.21 (d, *J* = 8.1 Hz, 1H), 4.59 – 4.56 (m, 2H), 3.73 – 3.71 (m, 1H), 3.54 – 3.52 (m, 1H).

**<sup>13</sup>C{<sup>1</sup>H} NMR** (151 MHz, CDCl<sub>3</sub>) δ 175.6, 175.2, 144.0, 137.7, 131.7, 129.3, 128.9, 128.5, 126.3, 126.2, 124.9, 123.0, 52.4, 50.0, 48.4, 48.1.

**HRMS** (ESI): *m/z*: [M + Na]<sup>+</sup> Calcd. for C<sub>18</sub>H<sub>12</sub>NO<sub>2</sub>SBrNa<sup>+</sup>: 407.9670; Found: 407.9666.

**(3a*R*,3b*S*,8b*R*,8c*R*)-6-bromo-2-phenyl-3a,3b,8b,8c-tetrahydro-1*H*-benzofuro[2',3':3,4]cyclobuta[1,2-*c*]pyrrole-1,3(2*H*)-dione (3af')**

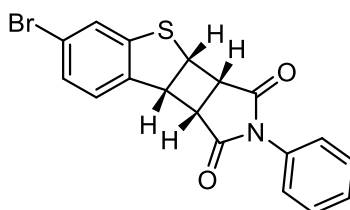

Yield: 45mg (56 %); white solid; *R*<sub>f</sub> = 0.4 (petroleum ether / ethyl acetate, 2:1); mp 220 °C.

**<sup>1</sup>H NMR** (600 MHz, CDCl<sub>3</sub>) δ 7.39 – 7.31 (m, 4H), 7.18 (dd, *J* = 8.1, 1.8 Hz, 1H), 7.03 (d, *J* = 8.1 Hz, 1H), 6.71 – 6.68 (m, 2H), 4.94 – 4.88 (m, 2H), 3.98 – 3.95 (m, 1H), 3.86 – 3.83 (m, 1H).

**<sup>13</sup>C{<sup>1</sup>H} NMR** (151 MHz, CDCl<sub>3</sub>) δ 174.8, 174.1, 145.8, 135.0, 131.5, 129.3, 128.9, 128.2, 127.7, 126.4, 124.6, 123.1, 50.4, 45.7, 45.4, 45.2.

**HRMS** (ESI): *m/z*: [M + Na]<sup>+</sup> Calcd. for C<sub>18</sub>H<sub>12</sub>NO<sub>2</sub>SBrNa<sup>+</sup>: 407.9670; Found: 407.9679.

**(3a*S*,3b*R*,8b*S*,8c*R*)-7-bromo-2-phenyl-3a,3b,8b,8c-tetrahydro-1*H*-benzo[4',5']thieno[2',3':3,4]cyclobuta[1,2-*c*]pyrrole-1,3(2*H*)-dione (3ag)**

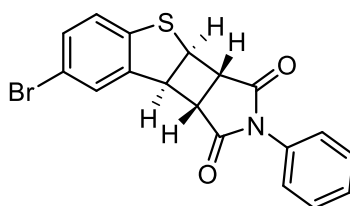

Yield: 14mg (18 %); white solid; *R*<sub>f</sub> = 0.5 (petroleum ether / dichloromethane, 1:1); mp 252 °C.

**<sup>1</sup>H NMR** (600 MHz, DMSO-*d*<sub>6</sub>) δ 7.56 – 7.52 (m, 2H), 7.47 – 7.44 (m, 3H), 7.39 (d, *J* = 7.8 Hz, 2H), 7.31 (d, *J* = 8.4 Hz, 1H), 4.80 (dd, *J* = 8.1, 3.9 Hz, 1H), 4.64 (d, *J* = 8.0 Hz, 1H), 3.62 – 3.60 (m, 1H), 3.55 – 3.53 (m, 1H).

**<sup>13</sup>C{<sup>1</sup>H} NMR** (151 MHz, DMSO-*d*<sub>6</sub>) δ 176.3, 175.9, 142.7, 141.4, 132.9, 132.0, 129.3, 129.0, 128.5, 127.7, 124.3, 118.0, 52.0, 50.5, 48.5, 47.7.

**HRMS** (ESI): *m/z*: [M + Na]<sup>+</sup> Calcd. for C<sub>18</sub>H<sub>12</sub>NO<sub>2</sub>SBrNa<sup>+</sup>: 407.9670; Found: 407.9666.

**(3a*S*,3b*S*,8b*R*,8c*R*)-7-bromo-2-phenyl-3a,3b,8b,8c-tetrahydro-1*H*-benzo[4',5']thieno[2',3':3,4]cyclobuta[1,2-*c*]pyrrole-1,3(2*H*)-dione (3ag')**

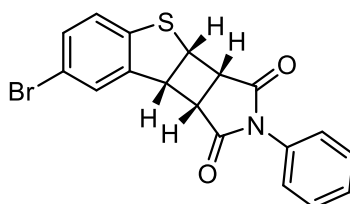

Yield: 36mg (47 %); white solid;  $R_f$  = 0.5 (petroleum ether / ethyl acetate, 2:1); mp 206 °C  
 $^1\text{H NMR}$  (600 MHz,  $\text{CDCl}_3$ )  $\delta$  7.38 – 7.30 (m, 5H), 7.03 (d,  $J$  = 8.1 Hz, 1H), 6.75 – 6.73 (m, 2H), 4.96 – 4.92 (m, 2H), 3.99 – 3.96 (m, 1H), 3.88 – 3.85 (m, 1H).

$^{13}\text{C}\{^1\text{H}\}$  NMR (151 MHz,  $\text{CDCl}_3$ )  $\delta$  174.6, 174.2, 142.7, 138.1, 132.1, 131.6, 129.6, 129.2, 128.9, 126.3, 123.0, 118.2, 50.6, 45.7, 45.4, 45.2.

HRMS (ESI):  $m/z$ :  $[\text{M} + \text{Na}]^+$  Calcd. for  $\text{C}_{18}\text{H}_{12}\text{NO}_2\text{SBrNa}^+$ : 407.9670; Found: 407.9671.

**(3a*R*,3b*S*,8b*R*,8c*R*)-8b-bromo-2-phenyl-3a,3b,8b,8c-tetrahydro-1*H*-benzofuro[2',3':3,4]cyclobuta[1,2-*c*]pyrrole-1,3(2*H*)-dione (3ah)**

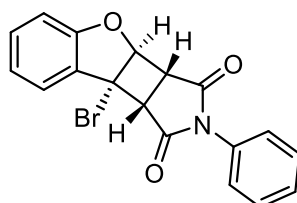

Yield: 30mg (41 %); white solid;  $R_f$  = 0.4 (petroleum ether / dichloromethane, 1:1); mp 222 °C.  
 $^1\text{H NMR}$  (600 MHz,  $\text{DMSO-}d_6$ )  $\delta$  7.65 (dd,  $J$  = 7.6, 1.4 Hz, 1H), 7.57 – 7.54 (m, 2H), 7.50 – 7.46 (m, 2H), 7.43 – 7.37 (m, 3H), 7.18 – 7.16 (m, 1H), 7.11 (d,  $J$  = 8.2 Hz, 1H), 5.89 (d,  $J$  = 2.0 Hz, 1H), 4.01 (d,  $J$  = 6.6 Hz, 1H), 3.55 (dd,  $J$  = 6.7, 2.7 Hz, 1H).

$^{13}\text{C}\{^1\text{H}\}$  NMR (151 MHz,  $\text{DMSO-}d_6$ )  $\delta$  174.0, 172.7, 158.2, 132.7, 132.1, 130.2, 129.5, 129.2, 127.6, 126.8, 123.7, 112.0, 88.3, 57.3, 52.1, 46.3.

HRMS (ESI):  $m/z$ :  $[\text{M} + \text{Na}]^+$  Calcd. for  $\text{C}_{18}\text{H}_{12}\text{NO}_3\text{BrNa}^+$ : 391.9898; Found: 391.9891.

**(3a*R*,3b*R*,8b*S*,8c*R*)-8b-bromo-2-phenyl-3a,3b,8b,8c-tetrahydro-1*H*-benzofuro[2',3':3,4]cyclobuta[1,2-*c*]pyrrole-1,3(2*H*)-dione (3ah')**

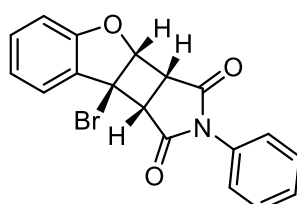

Yield: 10mg (13 %); white solid;  $R_f$  = 0.3 (petroleum ether / dichloromethane, 1:1); mp 198 °C.  
 $^1\text{H NMR}$  (600 MHz,  $\text{CDCl}_3$ )  $\delta$  7.38 (dd,  $J$  = 7.7, 1.4 Hz, 1H), 7.30 – 7.27 (m, 1H), 7.23 – 7.20 (m, 3H), 7.02 – 6.99 (m, 1H), 6.90 (d,  $J$  = 8.2 Hz, 1H), 6.39 – 6.37 (m, 2H), 5.53 (dd,  $J$  = 8.5, 1.0 Hz, 1H), 4.10 (dd,  $J$  = 7.7, 1.0 Hz, 1H), 3.96 – 3.93 (m, 1H).  
 $^{13}\text{C}\{^1\text{H}\}$  NMR (151 MHz,  $\text{CDCl}_3$ )  $\delta$  172.4, 171.1, 160.1, 132.2, 131.1, 129.1, 129.0, 127.2, 126.3, 126.2, 123.3, 111.7, 85.0, 56.1, 53.5, 43.2.  
HRMS (ESI):  $m/z$ :  $[\text{M} + \text{Na}]^+$  Calcd. for  $\text{C}_{18}\text{H}_{12}\text{NO}_3\text{BrNa}^+$ : 391.9898; Found: 391.9900.

**(3a*R*,3b*S*,8b*R*,8c*R*)-3b-ethyl-2-phenyl-3a,3b,8b,8c-tetrahydro-1*H*-benzofuro[2',3':3,4]cyclobuta[1,2-*c*]pyrrole-1,3(2*H*)-dione (3ai)**

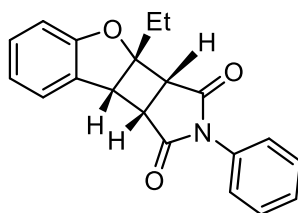

Yield: 32mg (50 %); white solid;  $R_f$  = 0.5 (petroleum ether / ethyl acetate, 2:1); mp 181 °C.  
 $^1\text{H NMR}$  (600 MHz,  $\text{CDCl}_3$ )  $\delta$  7.29 – 7.27 (m, 3H), 7.24 – 7.19 (m, 2H), 6.92 – 6.85 (m, 2H), 6.53 – 6.51 (m, 2H), 4.29 (d,  $J$  = 8.7 Hz, 1H), 3.71 (dd,  $J$  = 8.7, 7.0 Hz, 1H), 3.59 (dd,  $J$  = 7.0, 2.0 Hz, 1H), 2.19 – 2.13 (m, 1H), 2.10 – 2.04 (m, 1H), 1.11 (t,  $J$  = 7.3 Hz, 3H).  
 $^{13}\text{C}\{^1\text{H}\}$  NMR (151 MHz,  $\text{CDCl}_3$ )  $\delta$  175.5, 173.0, 161.8, 131.6, 130.0, 129.0, 128.7, 126.8, 126.5, 125.0, 121.7, 110.3, 89.5, 49.5, 47.4, 40.9, 30.2, 7.2.  
HRMS (ESI):  $m/z$ :  $[\text{M} + \text{Na}]^+$  Calcd. for  $\text{C}_{20}\text{H}_{17}\text{NO}_3\text{Na}^+$ : 342.1113; Found: 342.1106.

**(3a*S*,3b*S*,8b*R*,8c*R*)-8b-bromo-2-phenyl-3a,3b,8b,8c-tetrahydro-1*H*-benzo[4',5']thieno[2',3':3,4]cyclobuta[1,2-*c*]pyrrole-1,3(2*H*)-dione (3aj)**

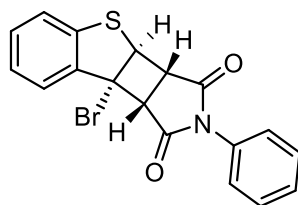

Yield: 50mg (65 %); white solid;  $R_f$  = 0.4 (petroleum ether / dichloromethane, 1:1); mp 232°C.  
 $^1\text{H NMR}$  (600 MHz,  $\text{CDCl}_3$ )  $\delta$  7.62 (d,  $J$  = 7.6 Hz, 1H), 7.55 (t,  $J$  = 7.7 Hz, 2H), 7.48 (t,  $J$  = 7.5 Hz, 1H), 7.41 (d,  $J$  = 7.4 Hz, 2H), 7.37 – 7.34 (m, 1H), 7.31 – 7.25 (m, 2H), 4.66 (d,  $J$  = 3.9 Hz, 1H), 3.97 (d,  $J$  = 6.7 Hz, 1H), 3.53 (dd,  $J$  = 6.6, 4.1 Hz, 1H).

$^{13}\text{C}\{^1\text{H}\}$  NMR (151 MHz,  $\text{CDCl}_3$ )  $\delta$  174.4, 171.7, 140.8, 139.0, 131.7, 130.7, 129.3, 129.1, 126.6, 126.5, 126.4, 122.4, 63.7, 58.2, 54.7, 46.8.

HRMS (ESI):  $m/z$ :  $[\text{M} + \text{Na}]^+$  Calcd. for  $\text{C}_{18}\text{H}_{12}\text{NO}_2\text{SBrNa}^+$ : 407.9670; Found: 407.9677.

**(3a*S*,3b*R*,8b*S*,8c*R*)-8b-bromo-2-phenyl-3a,3b,8b,8c-tetrahydro-1*H*-benzo[4',5']thieno[2',3':3,4]cyclobuta[1,2-*c*]pyrrole-1,3(2*H*)-dione (3aj')**

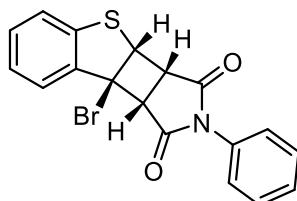

Yield: 14mg (18 %); white solid;  $R_f$  = 0.6 (petroleum ether / dichloromethane, 1:1); mp 172 °C.

$^1\text{H}$  NMR (600 MHz,  $\text{CDCl}_3$ )  $\delta$  7.48 (d,  $J$  = 7.8 Hz, 1H), 7.32 – 7.28 (m, 4H), 7.21 – 7.17 (m, 2H), 6.52 – 6.49 (m, 2H), 5.02 (dd,  $J$  = 9.9, 0.8 Hz, 1H), 4.42 (dd,  $J$  = 7.6, 0.8 Hz, 1H), 3.99 (dd,  $J$  = 9.9, 7.6 Hz, 1H).

$^{13}\text{C}\{^1\text{H}\}$  NMR (151 MHz,  $\text{CDCl}_3$ )  $\delta$ : 72.4, 172.2, 141.5, 137.5, 131.1, 131.0, 129.1, 129.0, 128.3, 126.3, 126.0, 122.3, 57.5, 55.7, 42.9.

HRMS (ESI):  $m/z$ :  $[\text{M} + \text{Na}]^+$  Calcd. for  $\text{C}_{18}\text{H}_{12}\text{NO}_2\text{SBrNa}^+$ : 407.9670; Found: 407.9677.

**(3a*S*,3b*R*,8b*S*,8c*R*)-3b-methyl-2-phenyl-3a,3b,8b,8c-tetrahydro-1*H*-benzo[4',5']thieno[2',3':3,4]cyclobuta[1,2-*c*]pyrrole-1,3(2*H*)-dione (3ak)**

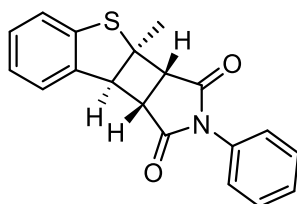

Yield: 15mg (22 %); white solid;  $R_f$  = 0.5 (petroleum ether / ethyl acetate, 2:1); mp 174 °C.

$^1\text{H}$  NMR (600 MHz,  $\text{CDCl}_3$ )  $\delta$  7.53 – 7.51 (m, 2H), 7.45 – 7.43 (m, 1H), 7.35 – 7.33 (m, 2H), 7.29 (d,  $J$  = 7.5 Hz, 1H), 7.26 – 7.23 (m, 1H), 7.18 (d,  $J$  = 7.8 Hz, 1H), 7.12 (t,  $J$  = 7.4 Hz, 1H), 4.10 (d,  $J$  = 3.9 Hz, 1H), 3.90 (d,  $J$  = 7.0 Hz, 1H), 3.44 (dd,  $J$  = 7.0, 3.8 Hz, 1H), 1.76 (s, 3H).

$^{13}\text{C}\{^1\text{H}\}$  NMR (151 MHz,  $\text{CDCl}_3$ )  $\delta$  176.4, 174.3, 142.0, 138.4, 131.8, 129.4, 129.1, 129.0, 126.4, 125.2, 125.2, 121.5, 58.4, 52.9, 45.1, 25.5.

HRMS (ESI):  $m/z$ :  $[\text{M} + \text{Na}]^+$  Calcd. for  $\text{C}_{19}\text{H}_{15}\text{NO}_2\text{SNa}^+$ : 344.0721; Found: 344.0728.

**(3aS,3bS,8bR,8cR)-3b-methyl-2-phenyl-3a,3b,8b,8c-tetrahydro-1H-benzo[4',5']thieno[2',3':3,4]cyclobuta[1,2-c]pyrrole-1,3(2H)-dione (3ak')**

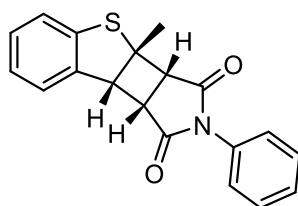

Yield: 27mg (43 %); white solid;  $R_f$  = 0.5 (petroleum ether / ethyl acetate, 10:1); mp 158 °C.

$^1\text{H NMR}$  (600 MHz,  $\text{CDCl}_3$ )  $\delta$  7.33 – 7.28 (m, 3H), 7.21 – 7.16 (m, 2H), 7.12 (d,  $J$  = 7.8 Hz, 1H), 7.06 – 7.04 (m, 1H), 6.68 – 6.66 (m, 2H), 4.45 (d,  $J$  = 9.4 Hz, 1H), 3.93 (dd,  $J$  = 9.4, 6.9 Hz, 1H), 3.54 (dd,  $J$  = 6.9, 1.5 Hz, 1H), 1.99 (s, 3H).

$^{13}\text{C}\{^1\text{H}\}$  NMR (151 MHz,  $\text{CDCl}_3$ )  $\delta$  175.1, 174.4, 143.6, 136.0, 131.7, 129.1, 129.1, 128.7, 126.7, 126.5, 124.9, 121.5, 57.3, 57.1, 52.2, 42.7, 29.1.

HRMS (ESI):  $m/z$ :  $[\text{M} + \text{Na}]^+$  Calcd. for  $\text{C}_{19}\text{H}_{15}\text{NO}_2\text{SNa}^+$ : 344.0721; Found: 344.0728.

**(3aS,3bR,8bS,8cR)-3b-acetyl-3a,8b,8c-trimethyl-2-phenyl-3a,3b,8b,8c-tetrahydro-1H-benzo[4',5']thieno[2',3':3,4]cyclobuta[1,2-c]pyrrole-1,3(2H)-dione (3al)**

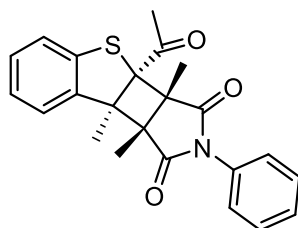

Yield: 42mg (60 %); white solid;  $R_f$  = 0.5 (petroleum ether / ethyl acetate, 10:1); mp 209 °C.

$^1\text{H NMR}$  (600 MHz,  $\text{CDCl}_3$ )  $\delta$  7.52 – 7.49 (m, 2H), 7.45 – 7.42 (m, 1H), 7.33 (d,  $J$  = 7.6 Hz, 1H), 7.31 – 7.27 (m, 3H), 7.21 (d,  $J$  = 7.4 Hz, 1H), 7.19 – 7.16 (m, 1H), 4.88 (d,  $J$  = 4.2 Hz, 1H), 3.99 (dd,  $J$  = 7.0, 1.3 Hz, 1H), 3.52 (dd,  $J$  = 6.9, 4.2 Hz, 1H), 2.42 (s, 3H).

$^{13}\text{C}\{^1\text{H}\}$  NMR (151 MHz,  $\text{CDCl}_3$ )  $\delta$  175.2, 173.6, 140.1, 137.7, 131.6, 129.4, 129.3, 129.1, 126.7, 126.1, 125.3, 121.7, 67.6, 52.8, 52.4, 44.6, 29.7, 27.6.

HRMS (ESI):  $m/z$ :  $[\text{M} + \text{Na}]^+$  Calcd. for  $\text{C}_{20}\text{H}_{15}\text{NO}_3\text{SNa}^+$ : 372.0670; Found: 372.0676.

**methyl (3aS,3bR,8bS,8cR)-1,3-dioxo-2-phenyl-1,2,3,3a,8b,8c-hexahydro-3bH-benzo[4',5']thieno[2',3':3,4]cyclobuta[1,2-c]pyrrole-3b-carboxylate (3am)**

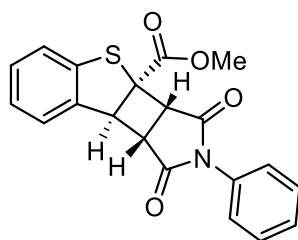

Yield: 59mg (81 %); white solid;  $R_f$  = 0.5 (petroleum ether / dichloromethane, 1:1); mp 208 °C.

$^1\text{H NMR}$  (600 MHz,  $\text{CDCl}_3$ )  $\delta$  7.53 – 7.50 (m, 2H), 7.46 – 7.43 (m, 1H), 7.34 – 7.31 (m, 3H), 7.28 – 7.25 (m, 1H), 7.20 (d,  $J$  = 7.8 Hz, 1H), 7.17 – 7.15 (m, 1H), 4.88 (d,  $J$  = 4.0 Hz, 1H), 3.97 (dd,  $J$  = 7.0, 1.2 Hz, 1H), 3.80 (s, 3H), 3.50 (dd,  $J$  = 7.0, 4.1 Hz, 1H).

$^{13}\text{C}\{^1\text{H}\}$  NMR (151 MHz,  $\text{CDCl}_3$ )  $\delta$  175.2, 173.3, 169.5, 140.8, 137.2, 131.8, 129.4, 129.3, 129.1, 126.6, 125.7, 125.0, 121.5, 54.6, 53.7, 52.5, 45.3.

HRMS (ESI):  $m/z$ :  $[\text{M} + \text{Na}]^+$  Calcd. for  $\text{C}_{20}\text{H}_{15}\text{NO}_4\text{SNa}^+$ : 388.0619; Found: 388.0625.

**(3aR,3bR,8bS,8cR)-8b-bromo-3a-methoxy-2-phenyl-3a,3b,8b,8c-tetrahydro-1H-benzo[4',5']thieno[2',3':3,4]cyclobuta[1,2-c]pyrrole-1,3(2H)-dione (3an)**

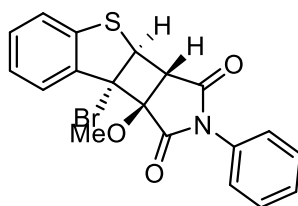

Yield: 61mg (73 %); white solid;  $R_f$  = 0.3 (petroleum ether / ethyl acetate, 10:1); mp 188 °C.

$^1\text{H NMR}$  (600 MHz,  $\text{CDCl}_3$ )  $\delta$  7.59 (d,  $J$  = 7.2 Hz, 1H), 7.56 – 7.53 (m, 2H), 7.49 – 7.46 (m, 1H), 7.39 – 7.37 (m, 2H), 7.35 – 7.32 (m, 1H), 7.26 – 7.22 (m, 2H), 4.28 (d,  $J$  = 4.2 Hz, 1H), 3.41 (d,  $J$  = 4.3 Hz, 1H), 3.32 (s, 3H).

$^{13}\text{C}\{^1\text{H}\}$  NMR (151 MHz,  $\text{CDCl}_3$ )  $\delta$  172.5, 171.4, 139.7, 135.8, 131.3, 130.8, 130.3, 129.4, 129.3, 126.4, 125.5, 122.2, 86.2, 66.7, 54.0, 53.5, 50.8.

HRMS (ESI):  $m/z$ :  $[\text{M} + \text{Na}]^+$  Calcd. for  $\text{C}_{19}\text{H}_{14}\text{NO}_3\text{SBrNa}^+$ : 437.9775; Found: 437.9773.



## 6. Mechanistic studies

### 6.1 Stern-Volmer quenching studies

Stern-Volmer luminescence quenching studies were carried out using a  $7.5 \times 10^{-3}$  M solution of photocatalyst and variable concentrations of substrate (ranging from 0 to 0.125 M) in  $\text{CF}_3\text{CH}_2\text{OH}$  at room temperature under an argon atmosphere and were conducted on a Fluorescence spectrophotometer (SHIMADZU, RF-5301pc). The solutions were irradiated at 390 nm and the luminescence measured at 445 nm. Linear regression of  $I_0/I$  against concentration was performed in Origin. ( $I_0$  = emission intensity of the photocatalyst in isolation at the specified wavelength;  $I$  = observed intensity as a function of the quencher concentration).

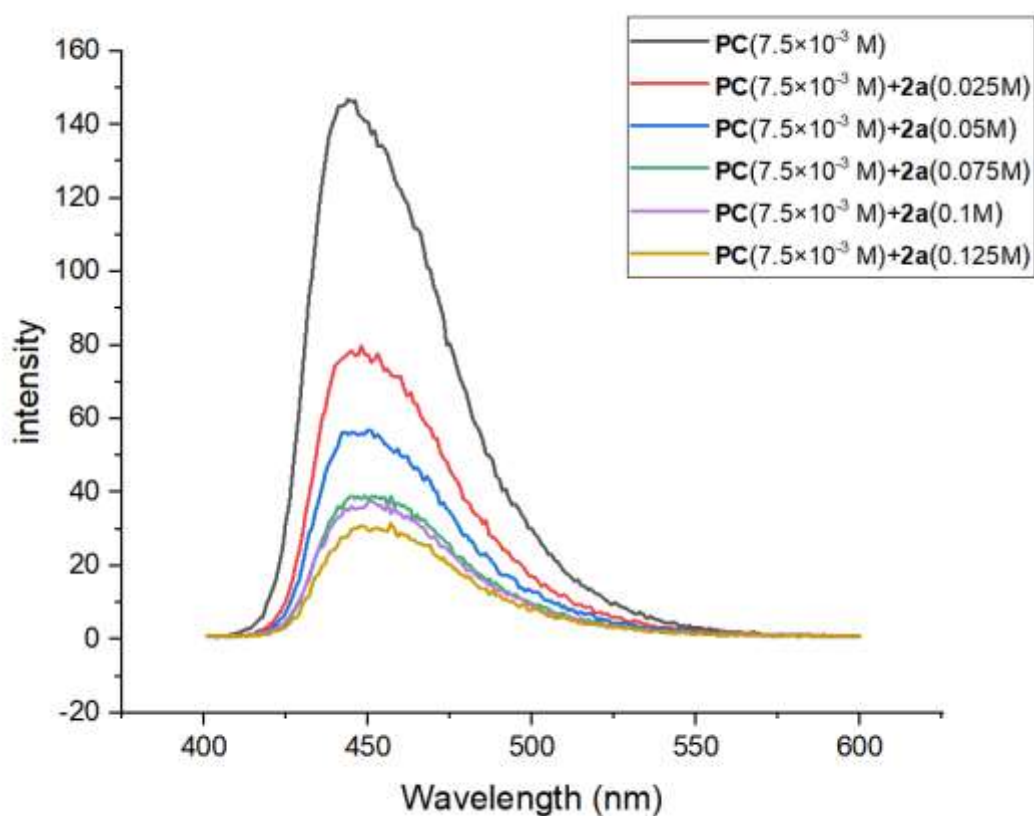

Figure S2. Luminescence quenching of *N*-Phenylmaleimide (2a) in  $\text{CF}_3\text{CH}_2\text{OH}$ .

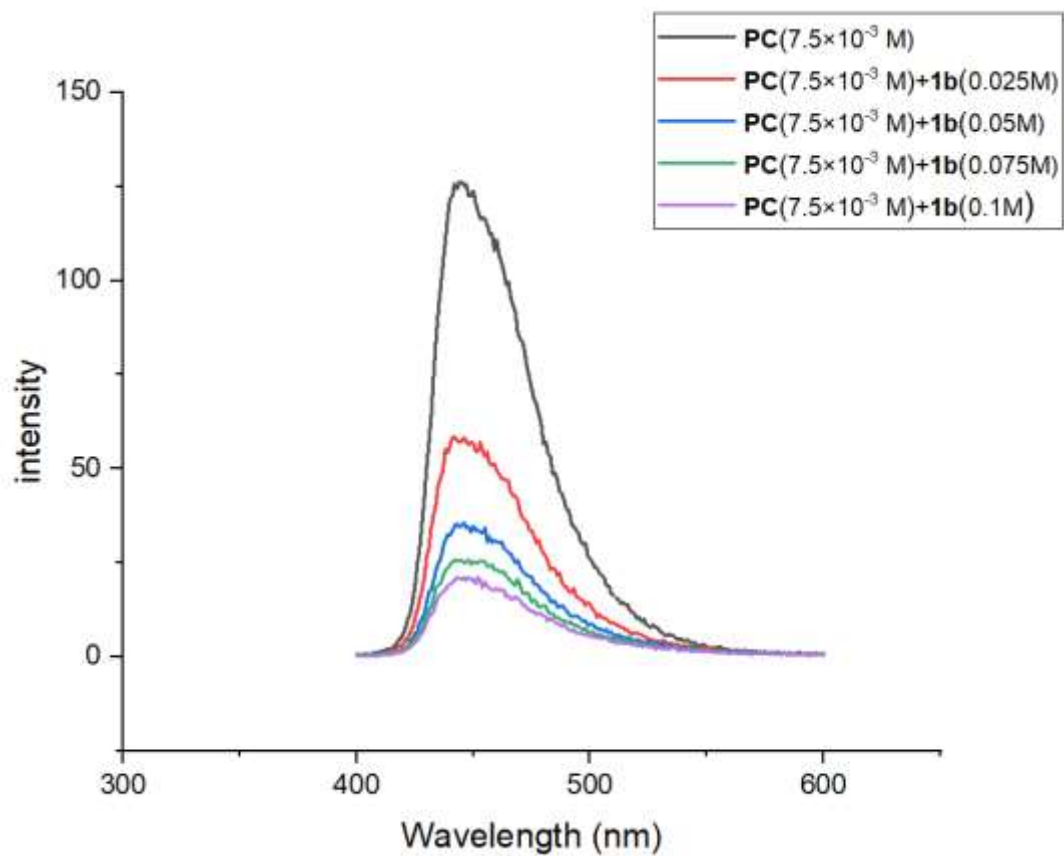

Figure S3. Luminescence quenching of Benzothiophene (**1b**) in CF<sub>3</sub>CH<sub>2</sub>OH.

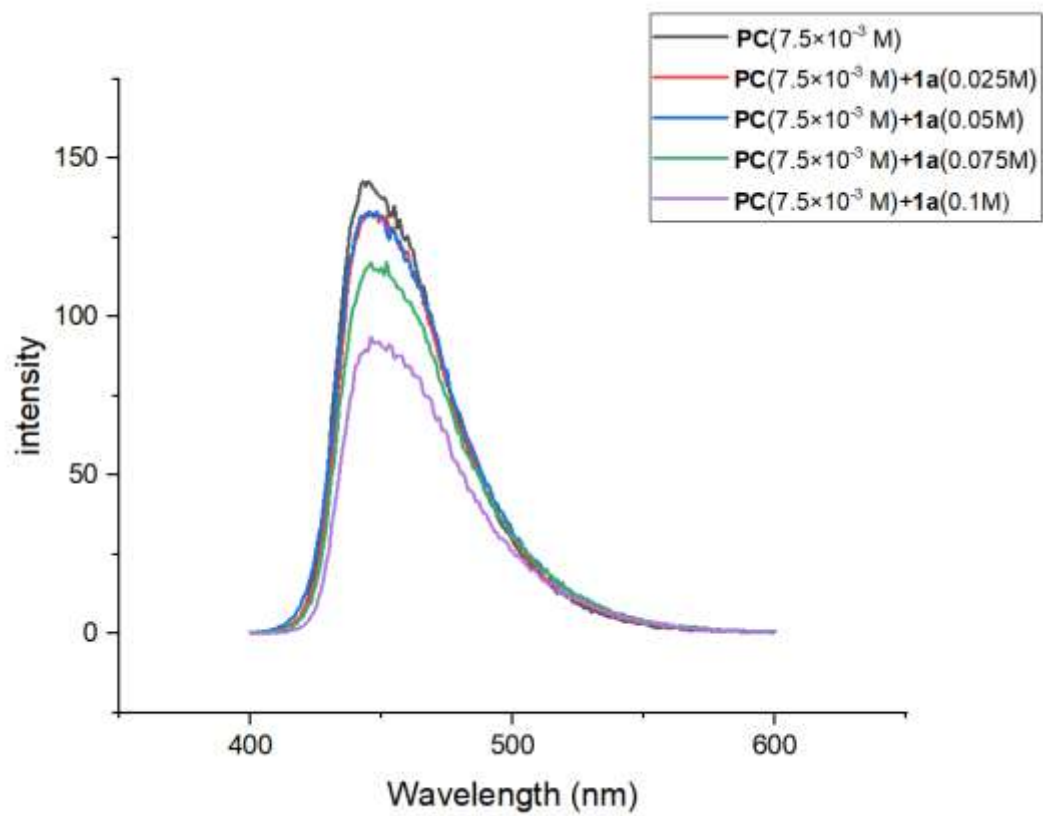

**Figure S4.** Luminescence quenching of Benzofuran (**1a**) in CF<sub>3</sub>CH<sub>2</sub>OH.

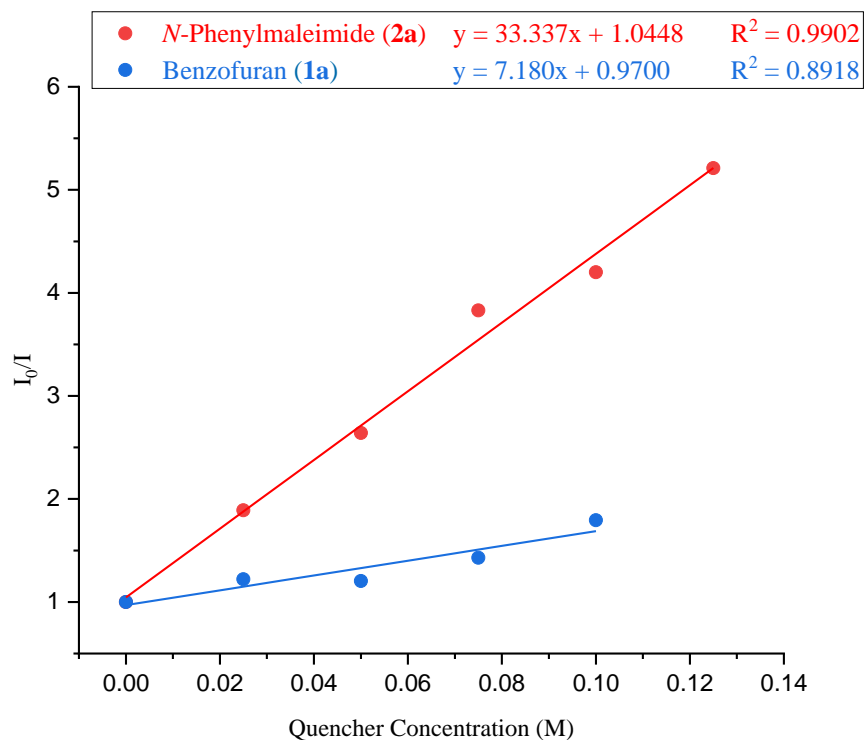

**Figure S5.** The luminescence quenching and corresponding Stern–Volmer plots of Thioxanthen-9-one ( $7.5 \times 10^{-3}$  M) by *N*-Phenylmaleimide (**2a**) and Benzofuran (**1a**) in deoxygenated  $\text{CF}_3\text{CH}_2\text{OH}$ , respectively.

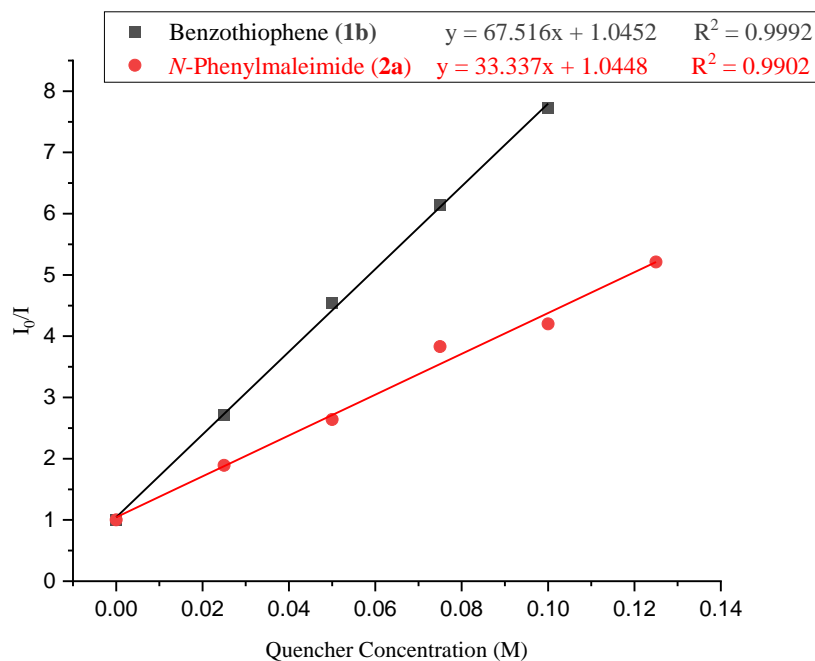

**Figure S6.** The luminescence quenching and corresponding Stern–Volmer plots of

Thioxanthen-9-one ( $7.5 \times 10^{-3}$  M) by *N*-Phenylmaleimide (**2a**) and Benzothiophene (**1b**) in deoxygenated  $\text{CF}_3\text{CH}_2\text{OH}$ , respectively.

## 6.2 UV -Vis absorption

UV/vis absorption spectroscopy measurements were performed on a SHIMADZU UV-2600 spectrophotometer, equipped with a temperature control unit at 25 °C. The samples were measured in fluorescence quartz cuvettes. The reaction substrates and photosensitizer were measured as following concentration (in  $\text{CF}_3\text{CH}_2\text{OH}$ ).

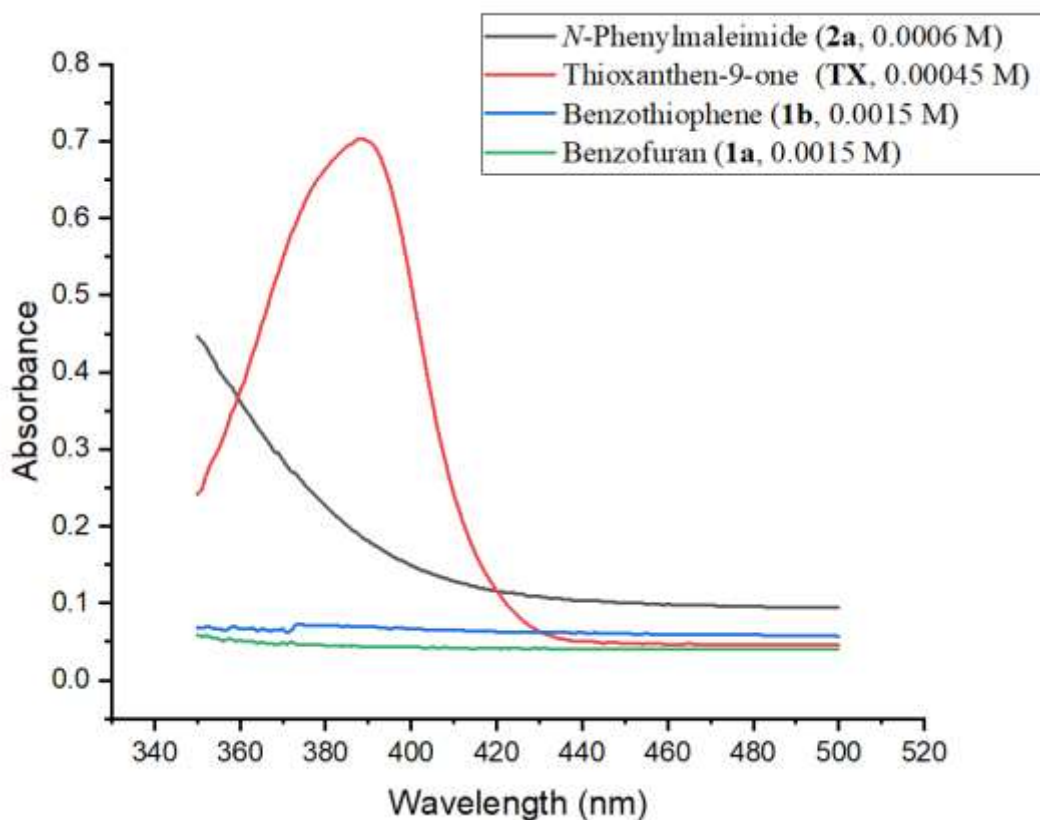

Figure S7. UV-Vis absorption of photosensitizer and substrates.

### 6.3 Control experiment with triplet quencher

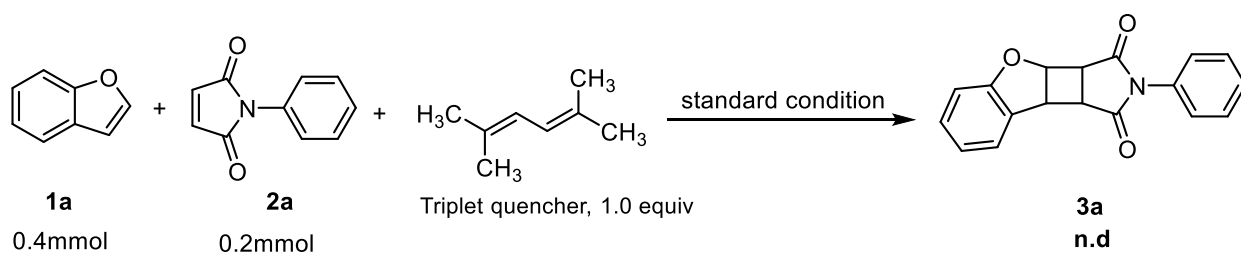

**Triplet quencher:** Reactions were conducted in the oven-dried Schlenk tube (10 mL) containing a stirring bar. **1a** (0.4 mmol), **2a** (0.2 mmol) and triplet quencher (1.0 equiv) and  $\text{CF}_3\text{CH}_2\text{OH}$  (4.0 mL) were combined under Ar atmosphere. The resulting mixture was stirred at room temperature for 24 h. No target product was detected after the reaction was completed by TLC analysis.

### 6.4 SET reagent experiment

**Electron transfer reagent:** Reactions were conducted in the vial (10 mL) sealed with rubber septa. **1a** (0.4 mmol), **2a** (0.2 mmol) and CAN (1.0 equiv) and  $\text{CF}_3\text{CH}_2\text{OH}$  (4.0 mL) were combined under Ar atmosphere. The resulting mixture was stirred at room temperature for 24 h. No target product was detected after the reaction was completed by TLC analysis.

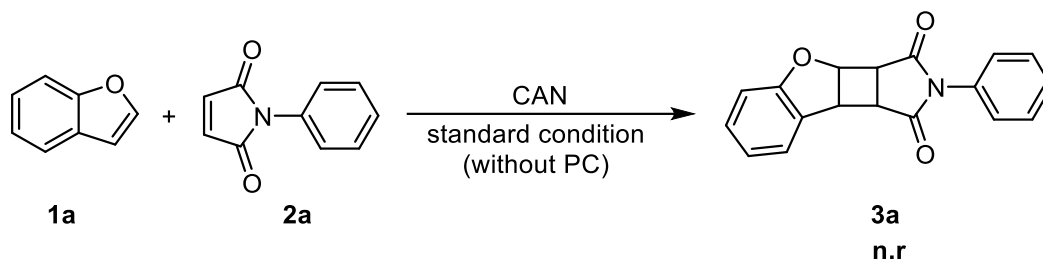

**Electron transfer reagent:** Reactions were conducted in the vial (10 mL) sealed with rubber septa. **1a** (0.4 mmol), **2a** (0.2 mmol) and Zn (1.0 equiv) and  $\text{CF}_3\text{CH}_2\text{OH}$  (4.0 mL) were combined under Ar atmosphere. The resulting mixture was stirred at room temperature for 24 h. No target product was detected after the reaction was completed by TLC analysis.

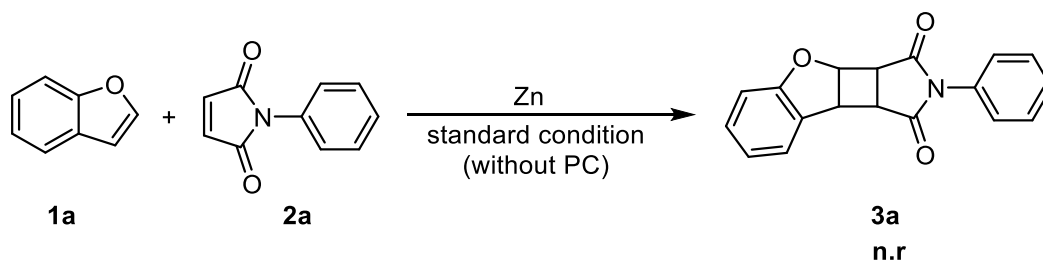

## 7.X-Ray Crystallographic Data

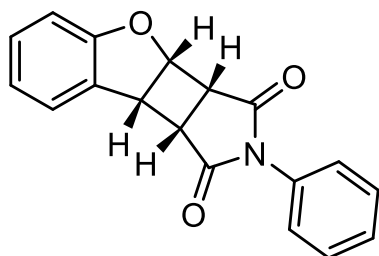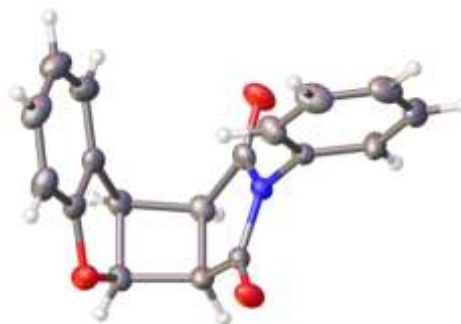

**Table 9** Crystal data and structure refinement for **3a'**

|                     |                                         |
|---------------------|-----------------------------------------|
| Identification code | 3a'                                     |
| Empirical formula   | $\text{C}_{18}\text{H}_{13}\text{NO}_3$ |
| Formula weight      | 291.29                                  |
| Temperature/K       | 292.37(10)                              |
| Crystal system      | orthorhombic                            |

|                                             |                                                                   |
|---------------------------------------------|-------------------------------------------------------------------|
| Space group                                 | Pbca                                                              |
| a/Å                                         | 11.24800(10)                                                      |
| b/Å                                         | 11.9893(2)                                                        |
| c/Å                                         | 21.1722(2)                                                        |
| $\alpha$ /°                                 | 90                                                                |
| $\beta$ /°                                  | 90                                                                |
| $\gamma$ /°                                 | 90                                                                |
| Volume/Å <sup>3</sup>                       | 2855.19(6)                                                        |
| Z                                           | 8                                                                 |
| $\rho_{\text{calc}}$ /cm <sup>3</sup>       | 1.355                                                             |
| $\mu$ /mm <sup>-1</sup>                     | 0.760                                                             |
| F(000)                                      | 1216.0                                                            |
| Crystal size/mm <sup>3</sup>                | 0.43 × 0.32 × 0.31                                                |
| Radiation                                   | CuK $\alpha$ ( $\lambda$ = 1.54184)                               |
| 2 $\Theta$ range for data collection/°      | 11.478 to 143.638                                                 |
| Index ranges                                | -13 ≤ h ≤ 13, -14 ≤ k ≤ 10,<br>-26 ≤ l ≤ 26                       |
| Reflections collected                       | 14004                                                             |
| Independent reflections                     | 2758 [ $R_{\text{int}}$ = 0.0285,<br>$R_{\text{sigma}}$ = 0.0177] |
| Data/restraints/parameters                  | 2758/0/199                                                        |
| Goodness-of-fit on F <sup>2</sup>           | 1.074                                                             |
| Final R indexes [ $I \geq 2\sigma$ (I)]     | $R_1 = 0.0572$ , $wR_2 = 0.1571$                                  |
| Final R indexes [all data]                  | $R_1 = 0.0597$ , $wR_2 = 0.1599$                                  |
| Largest diff. peak/hole / e Å <sup>-3</sup> | 0.56/-0.25                                                        |

**Table 10** Fractional Atomic Coordinates ( $\times 10^4$ ) and Equivalent Isotropic Displacement Parameters ( $\text{\AA}^2 \times 10^3$ ) for **3a'**.  $U_{\text{eq}}$  is defined as 1/3 of of the trace of the orthogonalised  $U_{ij}$  tensor.

| Atom | x          | y          | Z          | U(eq)   |
|------|------------|------------|------------|---------|
| O1   | 1638.1(13) | 2252.5(13) | 7134.3(7)  | 50.9(4) |
| O2   | 5529.8(14) | 1363.7(13) | 6101.8(8)  | 54.1(4) |
| O3   | 3933.2(14) | 3805.6(12) | 7517.6(7)  | 50.6(4) |
| N1   | 4832.0(12) | 2777.8(12) | 6737.9(7)  | 31.5(4) |
| C1   | 1732.0(17) | 2282.3(16) | 6486.4(9)  | 40.5(4) |
| C2   | 1111(2)    | 3055(2)    | 6115.3(13) | 56.8(6) |
| C3   | 1280(3)    | 2978(2)    | 5463.8(13) | 62.4(7) |



|     |            |            |            |         |
|-----|------------|------------|------------|---------|
| C4  | 1996(3)    | 2179(2)    | 5211.5(12) | 64.1(7) |
| C5  | 2588(2)    | 1421(2)    | 5582.7(11) | 55.8(6) |
| C6  | 2445.2(18) | 1474.7(16) | 6226.6(9)  | 40.2(4) |
| C7  | 2921.0(18) | 747.7(16)  | 6760.1(10) | 42.2(5) |
| C8  | 2451.3(18) | 1410.5(17) | 7333.9(10) | 42.8(5) |
| C9  | 3742.3(17) | 1776.8(17) | 7496.4(9)  | 38.3(4) |
| C10 | 4224.8(17) | 968.9(16)  | 6990.7(10) | 40.5(4) |
| C11 | 4955.3(15) | 1668.5(16) | 6551.1(9)  | 36.5(4) |
| C12 | 4140.1(15) | 2917.1(15) | 7277.2(8)  | 34.0(4) |
| C13 | 5431.5(16) | 3682.6(14) | 6429.0(8)  | 32.4(4) |
| C14 | 4808.6(19) | 4408.8(18) | 6051.3(11) | 48.4(5) |
| C15 | 5409(3)    | 5286(2)    | 5768.8(12) | 63.1(7) |
| C16 | 6616(2)    | 5414.0(19) | 5859.6(11) | 58.4(6) |
| C17 | 7228(2)    | 4676(2)    | 6226.7(11) | 56.9(6) |
| C18 | 6634.6(18) | 3813.9(19) | 6522.3(10) | 46.9(5) |

**Table 11** Anisotropic Displacement Parameters ( $\text{\AA}^2 \times 10^3$ ) for **3a'**. The Anisotropic displacement factor exponent takes the form:  $-2\pi^2[h^2a^{*2}U_{11}+2hka^*b^*U_{12}+\dots]$ .

| Atom | U11      | U22      | U33      | U23       | U13       | U12       |
|------|----------|----------|----------|-----------|-----------|-----------|
| O1   | 43.6(8)  | 63.0(10) | 46.0(8)  | -11.1(7)  | 0.5(6)    | 7.7(7)    |
| O2   | 53.3(9)  | 44.9(8)  | 64.1(10) | -4.8(7)   | 21.6(8)   | 11.0(7)   |
| O3   | 57.2(9)  | 41.6(8)  | 52.9(8)  | -11.2(7)  | 16.9(7)   | -5.7(6)   |
| N1   | 29.9(7)  | 30.9(8)  | 33.8(7)  | 2.1(6)    | 2.8(6)    | -0.1(6)   |
| C1   | 40.9(10) | 38.6(10) | 41.9(10) | -7.6(8)   | -2.2(8)   | -8.1(8)   |
| C2   | 55.7(13) | 42.9(12) | 72.0(15) | -8.1(11)  | -14.2(11) | 0.2(10)   |
| C3   | 80.0(17) | 46.6(13) | 60.6(14) | 13.0(11)  | -25.2(13) | -13.1(12) |
| C4   | 83.3(18) | 63.4(15) | 45.6(12) | 2.6(11)   | -5.4(12)  | -21.3(13) |
| C5   | 64.9(14) | 55.9(13) | 46.4(11) | -10.3(10) | 6.6(11)   | -12.3(11) |
| C6   | 40.1(10) | 33.8(9)  | 46.7(10) | -7.3(8)   | 0.9(8)    | -7.4(7)   |
| C7   | 46.5(11) | 30.3(9)  | 49.9(11) | 0.9(8)    | 3.3(8)    | -9.0(8)   |
| C8   | 39.3(10) | 42.8(11) | 46.2(10) | 4.8(8)    | 3.2(8)    | -5.5(8)   |
| C9   | 39.3(10) | 41.8(11) | 33.9(9)  | 6.9(8)    | 0.1(7)    | -4.6(8)   |
| C10  | 41.8(10) | 29.5(9)  | 50.3(11) | 7.5(8)    | 1.6(8)    | 3.8(7)    |
| C11  | 30.2(8)  | 32.6(9)  | 46.7(10) | 2.4(8)    | 1.0(8)    | 7.1(7)    |
| C12  | 30.7(8)  | 37.2(10) | 34.1(8)  | -0.9(7)   | 0.9(7)    | -2.1(7)   |
| C13  | 35.1(9)  | 30.7(9)  | 31.5(8)  | 1.4(7)    | 3.1(7)    | -1.4(7)   |
| C14  | 43.6(10) | 44.6(11) | 56.9(12) | 13.3(10)  | 5.0(9)    | 10.1(9)   |
| C15  | 84.1(18) | 43.3(12) | 61.9(14) | 19.9(11)  | 12.6(13)  | 15.5(12)  |
| C16  | 79.9(17) | 39.7(11) | 55.7(13) | 2.5(10)   | 22.2(12)  | -15.4(11) |
| C17  | 54.6(13) | 62.5(14) | 53.7(12) | 2.7(11)   | 1.9(10)   | -27.1(11) |
| C18  | 40.6(10) | 56.7(12) | 43.4(10) | 11.4(9)   | -6.7(8)   | -11.3(9)  |

**Table 12** Bond Lengths for **3a'**

| Atom | Atom | Length/Å | Atom | Atom | Length/Å |
|------|------|----------|------|------|----------|
| O1   | C1   | 1.376(2) | C6   | C7   | 1.524(3) |
| O1   | C8   | 1.426(3) | C7   | C8   | 1.545(3) |
| O2   | C11  | 1.207(2) | C7   | C10  | 1.568(3) |
| O3   | C12  | 1.203(2) | C8   | C9   | 1.556(3) |
| N1   | C11  | 1.394(2) | C9   | C10  | 1.542(3) |
| N1   | C12  | 1.392(2) | C9   | C12  | 1.511(3) |
| N1   | C13  | 1.435(2) | C10  | C11  | 1.498(3) |
| C1   | C2   | 1.401(3) | C13  | C14  | 1.374(3) |
| C1   | C6   | 1.372(3) | C13  | C18  | 1.377(3) |
| C2   | C3   | 1.395(4) | C14  | C15  | 1.386(3) |
| C3   | C4   | 1.361(4) | C15  | C16  | 1.379(4) |
| C4   | C5   | 1.374(4) | C16  | C17  | 1.364(4) |
| C5   | C6   | 1.374(3) | C17  | C18  | 1.381(3) |

**Table 13** Bond Angles for **3a'**.

| Atom | Atom | Atom | Angle/°    | Atom | Atom | Atom | Angle/°    |
|------|------|------|------------|------|------|------|------------|
| C1   | O1   | C8   | 105.33(15) | C10  | C9   | C8   | 89.87(15)  |
| C11  | N1   | C13  | 123.03(15) | C12  | C9   | C8   | 117.63(16) |
| C12  | N1   | C11  | 113.75(15) | C12  | C9   | C10  | 104.52(14) |
| C12  | N1   | C13  | 123.09(14) | C9   | C10  | C7   | 89.61(14)  |
| O1   | C1   | C2   | 122.54(19) | C11  | C10  | C7   | 114.47(16) |
| C6   | C1   | O1   | 115.21(18) | C11  | C10  | C9   | 105.82(15) |
| C6   | C1   | C2   | 122.2(2)   | O2   | C11  | N1   | 124.45(18) |
| C3   | C2   | C1   | 116.3(2)   | O2   | C11  | C10  | 127.87(18) |
| C4   | C3   | C2   | 121.0(2)   | N1   | C11  | C10  | 107.65(15) |
| C3   | C4   | C5   | 121.9(2)   | O3   | C12  | N1   | 124.15(17) |
| C4   | C5   | C6   | 118.7(2)   | O3   | C12  | C9   | 127.85(17) |
| C1   | C6   | C5   | 119.9(2)   | N1   | C12  | C9   | 107.99(15) |
| C1   | C6   | C7   | 108.17(17) | C14  | C13  | N1   | 120.30(17) |
| C5   | C6   | C7   | 131.9(2)   | C14  | C13  | C18  | 120.81(18) |
| C6   | C7   | C8   | 99.71(16)  | C18  | C13  | N1   | 118.89(16) |
| C6   | C7   | C10  | 117.54(15) | C13  | C14  | C15  | 118.9(2)   |
| C8   | C7   | C10  | 89.32(15)  | C16  | C15  | C14  | 120.2(2)   |
| O1   | C8   | C7   | 110.52(16) | C17  | C16  | C15  | 120.3(2)   |
| O1   | C8   | C9   | 117.67(16) | C16  | C17  | C18  | 120.0(2)   |
| C7   | C8   | C9   | 89.99(15)  | C13  | C18  | C17  | 119.7(2)   |

**Table 14** Torsion Angles for **3a'**.

| <b>A</b> | <b>B</b> | <b>C</b> | <b>D</b> | <b>Angle/°</b> | <b>A</b> | <b>B</b> | <b>C</b> | <b>D</b> | <b>Angle/°</b> |
|----------|----------|----------|----------|----------------|----------|----------|----------|----------|----------------|
| O1       | C1       | C2       | C3       | -179.2(2)      | C8       | C7       | C10      | C11      | -              |
|          |          |          |          |                |          |          |          |          | 115.58(17)     |
| O1       | C1       | C6       | C5       | 179.20(18)     | C8       | C9       | C10      | C7       | 8.28(14)       |
| O1       | C1       | C6       | C7       | 0.9(2)         | C8       | C9       | C10      | C11      | 123.66(16)     |
| O1       | C8       | C9       | C10      | -              | C8       | C9       | C12      | O3       | 80.0(3)        |
|          |          |          |          | 121.71(18)     |          |          |          |          |                |
| O1       | C8       | C9       | C12      | -15.3(3)       | C8       | C9       | C12      | N1       | -              |
|          |          |          |          |                |          |          |          |          | 101.18(18)     |
| N1       | C13      | C14      | C15      | 178.83(19)     | C9       | C10      | C11      | O2       | 177.0(2)       |
| N1       | C13      | C18      | C17      | 179.69(19)     | C9       | C10      | C11      | N1       | -4.9(2)        |
| C1       | O1       | C8       | C7       | -10.1(2)       | C10      | C7       | C8       | O1       | 127.99(16)     |
| C1       | O1       | C8       | C9       | 91.25(19)      | C10      | C7       | C8       | C9       | 8.27(14)       |
| C1       | C2       | C3       | C4       | 1.2(4)         | C10      | C9       | C12      | O3       | 177.62(19)     |
| C1       | C6       | C7       | C8       | -6.51(19)      | C10      | C9       | C12      | N1       | -3.55(19)      |
| C1       | C6       | C7       | C10      | -100.8(2)      | C11      | N1       | C12      | O3       | 179.42(18)     |
| C2       | C1       | C6       | C5       | 1.4(3)         | C11      | N1       | C12      | C9       | 0.5(2)         |
| C2       | C1       | C6       | C7       | -              | C11      | N1       | C13      | C14      | 107.3(2)       |
|          |          |          |          | 176.83(18)     |          |          |          |          |                |
| C2       | C3       | C4       | C5       | -0.5(4)        | C11      | N1       | C13      | C18      | -73.3(2)       |
| C3       | C4       | C5       | C6       | 0.2(4)         | C12      | N1       | C11      | O2       | -              |
|          |          |          |          |                |          |          |          |          | 179.00(18)     |
| C4       | C5       | C6       | C1       | -0.7(3)        | C12      | N1       | C11      | C10      | 2.9(2)         |
| C4       | C5       | C6       | C7       | 177.1(2)       | C12      | N1       | C13      | C14      | -77.3(2)       |
| C5       | C6       | C7       | C8       | 175.5(2)       | C12      | N1       | C13      | C18      | 102.2(2)       |
| C5       | C6       | C7       | C10      | 81.2(3)        | C12      | C9       | C10      | C7       | -              |
|          |          |          |          |                |          |          |          |          | 110.31(15)     |
| C6       | C1       | C2       | C3       | -1.6(3)        | C12      | C9       | C10      | C11      | 5.07(19)       |
| C6       | C7       | C8       | O1       | 10.14(19)      | C13      | N1       | C11      | O2       | -3.2(3)        |
| C6       | C7       | C8       | C9       | -              | C13      | N1       | C11      | C10      | 178.68(15)     |
|          |          |          |          | 109.58(15)     |          |          |          |          |                |
| C6       | C7       | C10      | C9       | 92.26(18)      | C13      | N1       | C12      | O3       | 3.6(3)         |
| C6       | C7       | C10      | C11      | -15.0(2)       | C13      | N1       | C12      | C9       | -              |
|          |          |          |          |                |          |          |          |          | 175.28(15)     |
| C7       | C8       | C9       | C10      | -8.41(14)      | C13      | C14      | C15      | C16      | 1.0(4)         |
| C7       | C8       | C9       | C12      | 97.96(18)      | C14      | C13      | C18      | C17      | -0.9(3)        |
| C7       | C10      | C11      | O2       | -86.0(2)       | C14      | C15      | C16      | C17      | 0.2(4)         |
| C7       | C10      | C11      | N1       | 92.04(19)      | C15      | C16      | C17      | C18      | -1.7(4)        |
| C8       | O1       | C1       | C2       | -              | C16      | C17      | C18      | C13      | 2.0(3)         |
|          |          |          |          | 176.50(18)     |          |          |          |          |                |
| C8       | O1       | C1       | C6       | 5.8(2)         | C18      | C13      | C14      | C15      | -0.6(3)        |

C8 C7 C10 C9 -8.34(14)

---

**Table 15** Hydrogen Atom Coordinates ( $\text{\AA}\times 10^4$ ) and Isotropic Displacement Parameters ( $\text{\AA}^2\times 10^3$ ) for 3a'.

| Atom | x    | y    | z    | U(eq) |
|------|------|------|------|-------|
| H2   | 613  | 3588 | 6293 | 68    |
| H3   | 898  | 3481 | 5198 | 75    |
| H4   | 2087 | 2145 | 4775 | 77    |
| H5   | 3076 | 882  | 5402 | 67    |
| H7   | 2683 | -38  | 6744 | 51    |
| H8   | 2110 | 923  | 7658 | 51    |
| H9   | 3989 | 1593 | 7928 | 46    |
| H10  | 4635 | 312  | 7159 | 49    |
| H14  | 3997 | 4313 | 5986 | 58    |
| H15  | 4997 | 5791 | 5517 | 76    |
| H16  | 7014 | 6006 | 5670 | 70    |
| H17  | 8045 | 4754 | 6278 | 68    |
| H18  | 7046 | 3324 | 6783 | 56    |

## 8. References

- [1] I. Triandafillidi; N. F. Nikitas; P. L. Gkizis; N. Spiliopoulou; C. G. Kokotos. *ChemSusChem* **2022**, *15*, e202102441.
- [2] N. F. Nikitas; M. A. Theodoropoulou; C. G. Kokotos. *Eur. J. Org. Chem.* **2021**, *2021*, 1168-1175.
- [3] Banwell, M. G.; Jones, M. T.; Loong, D. T. J.; Lupton, D. W.; Pinkerton, D. M.; Ray, J. K.; Willis, A. C., A. *Tetrahedron* **2010**, *66* (47), 9252-9262.
- [4] He J, Bai Z-Q, Yuan P-F, Wu L-Z, Liu Q. *ACS Catalysis*. **2020**; *11*(1):446-55.

## 9. <sup>1</sup>H and <sup>13</sup>C NMR Spectra

### <sup>1</sup>H NMR Spectrum of 3a

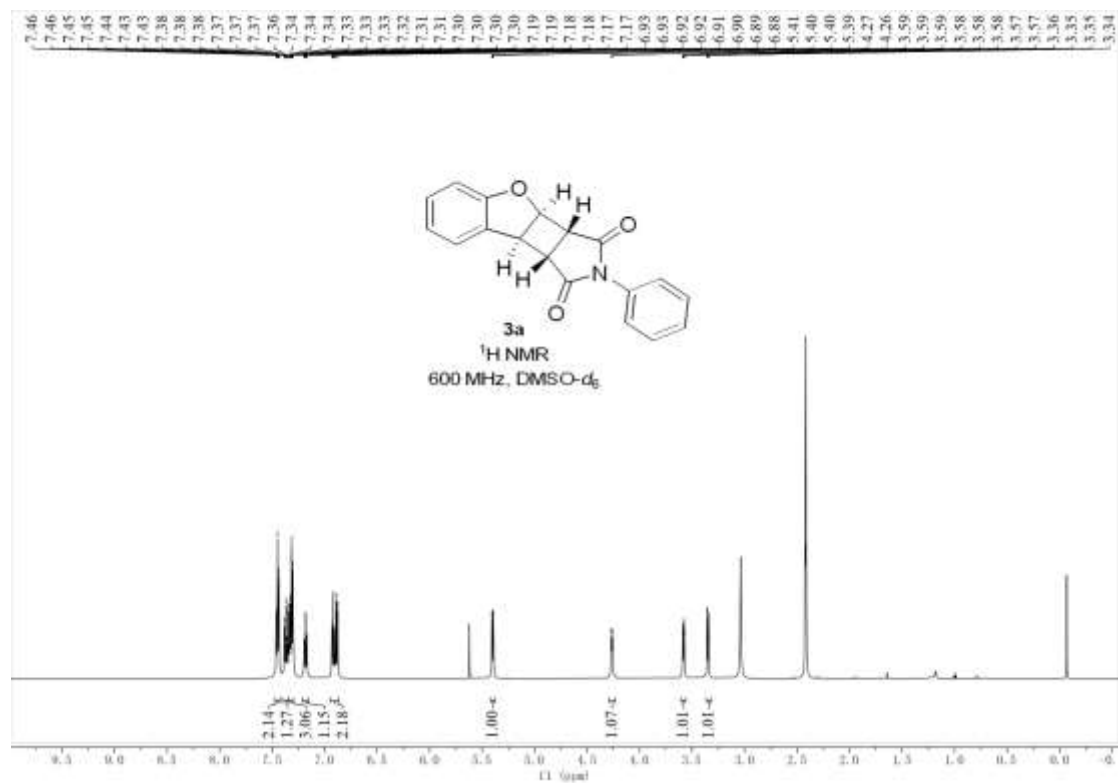

### <sup>13</sup>C{<sup>1</sup>H} NMR Spectrum of 3a

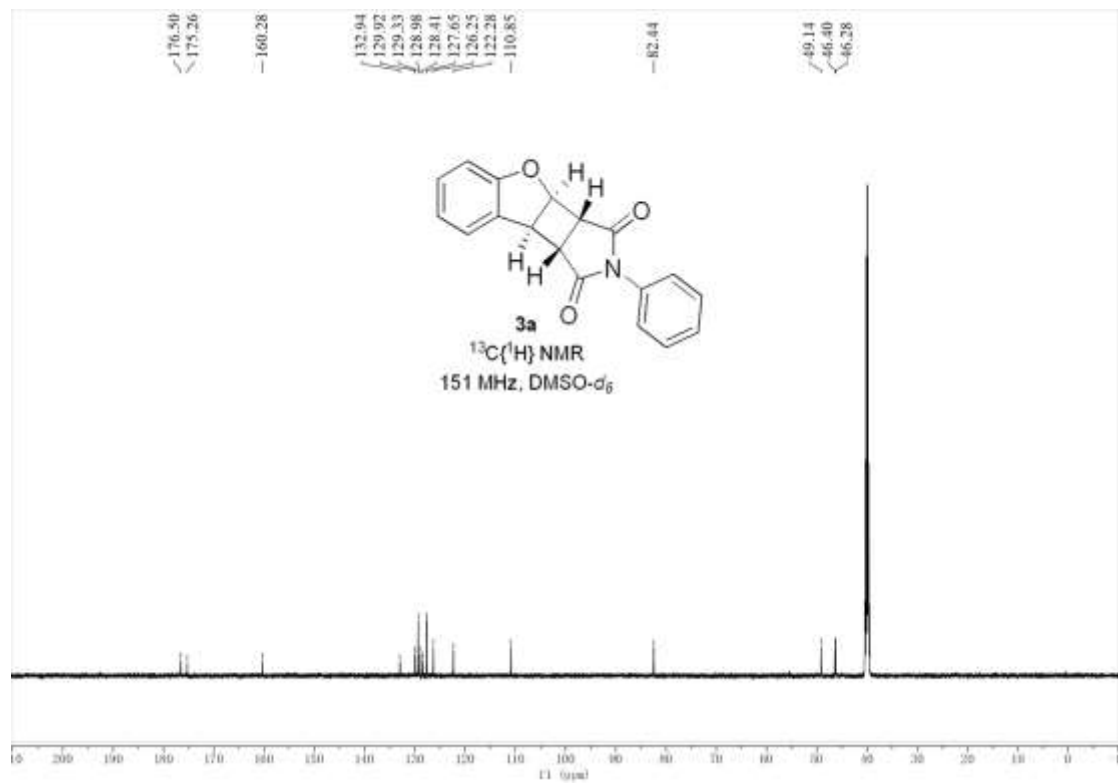

### <sup>1</sup>H NMR Spectrum of 3a'

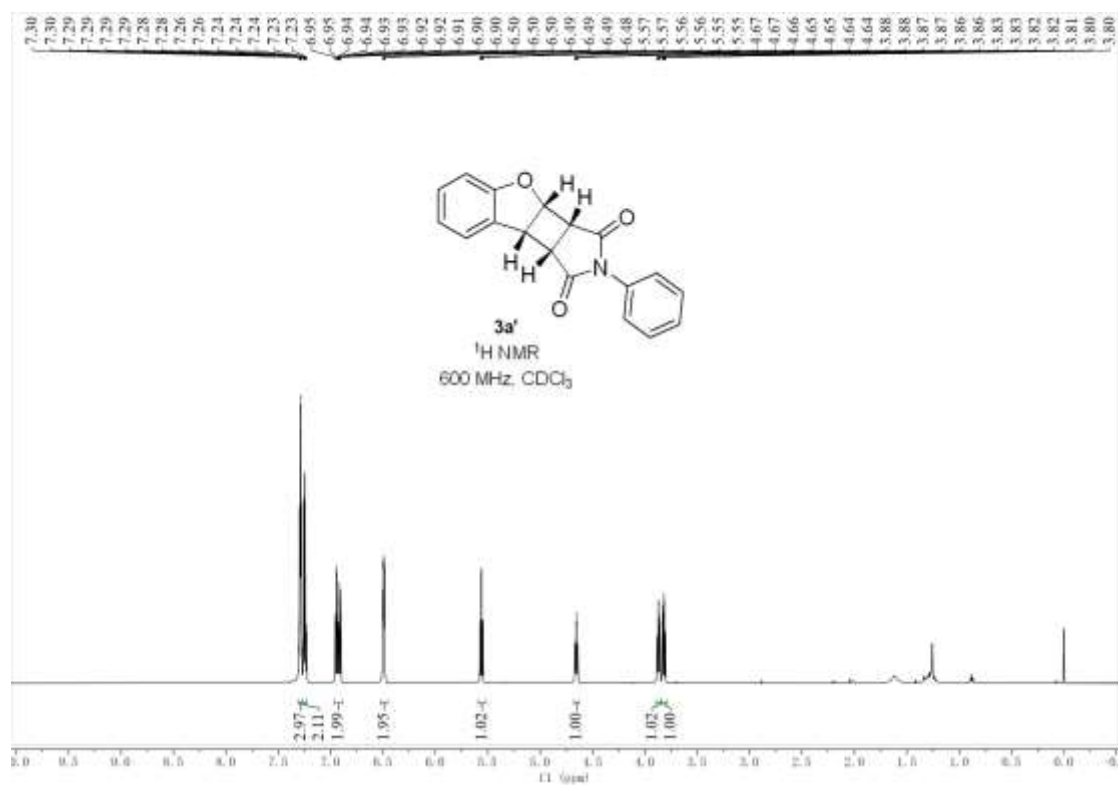

### <sup>13</sup>C{<sup>1</sup>H} NMR Spectrum of 3a'

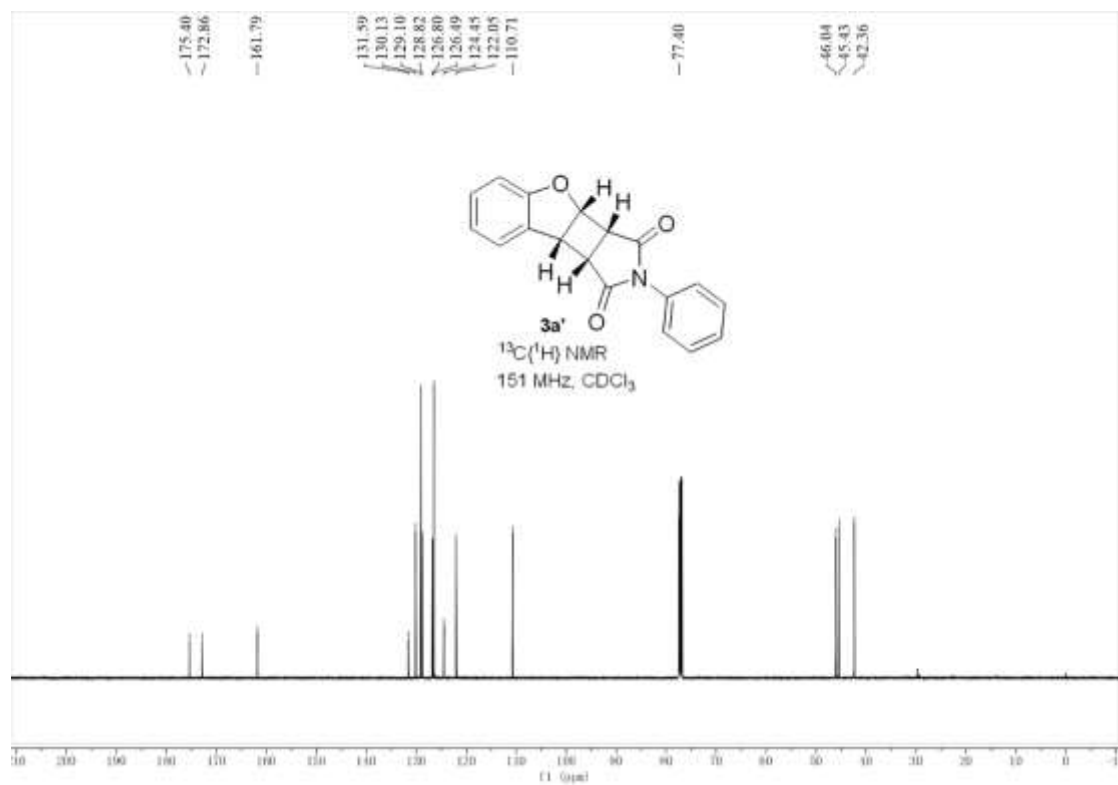

### <sup>1</sup>H NMR Spectrum of 3b

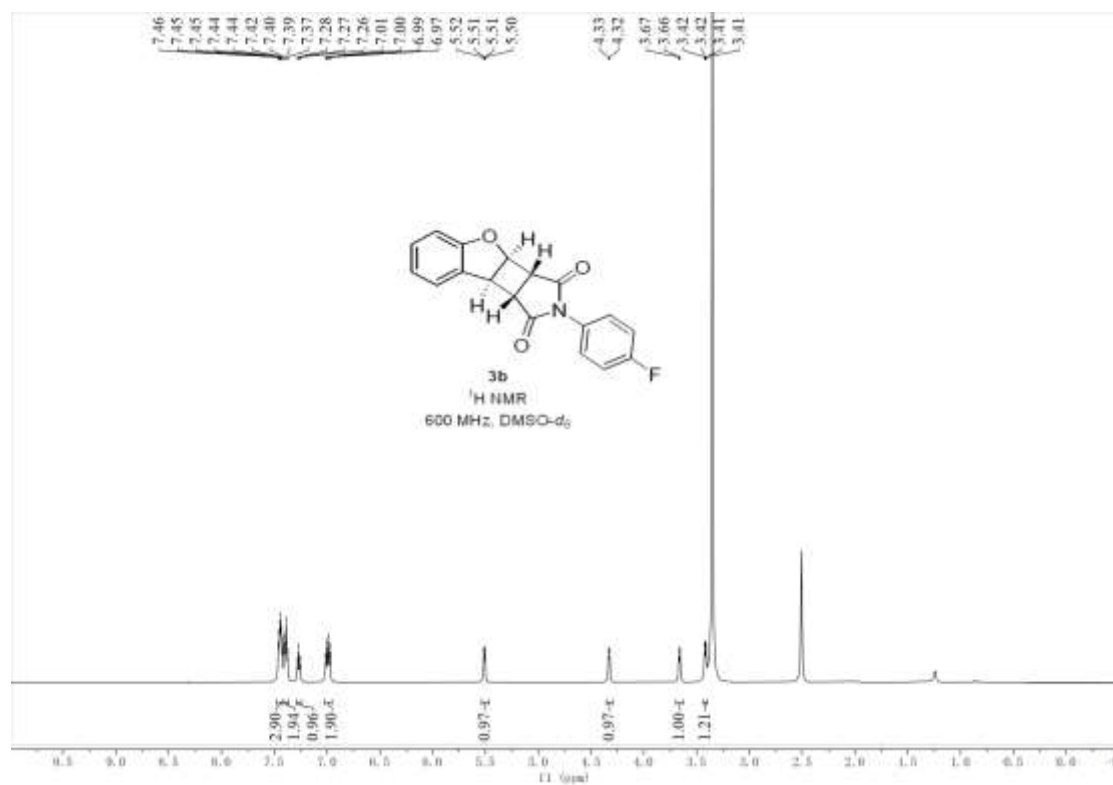

### <sup>13</sup>C{<sup>1</sup>H} NMR Spectrum of 3b

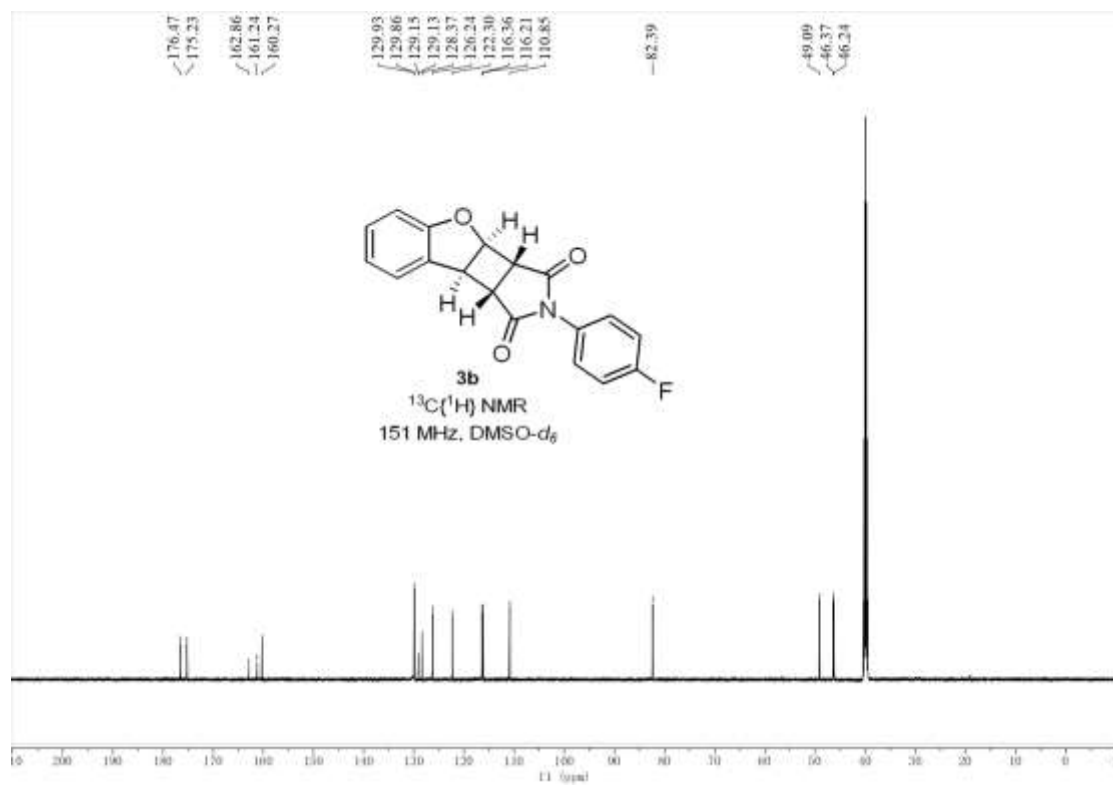

### <sup>19</sup>F NMR Spectrum of 3b

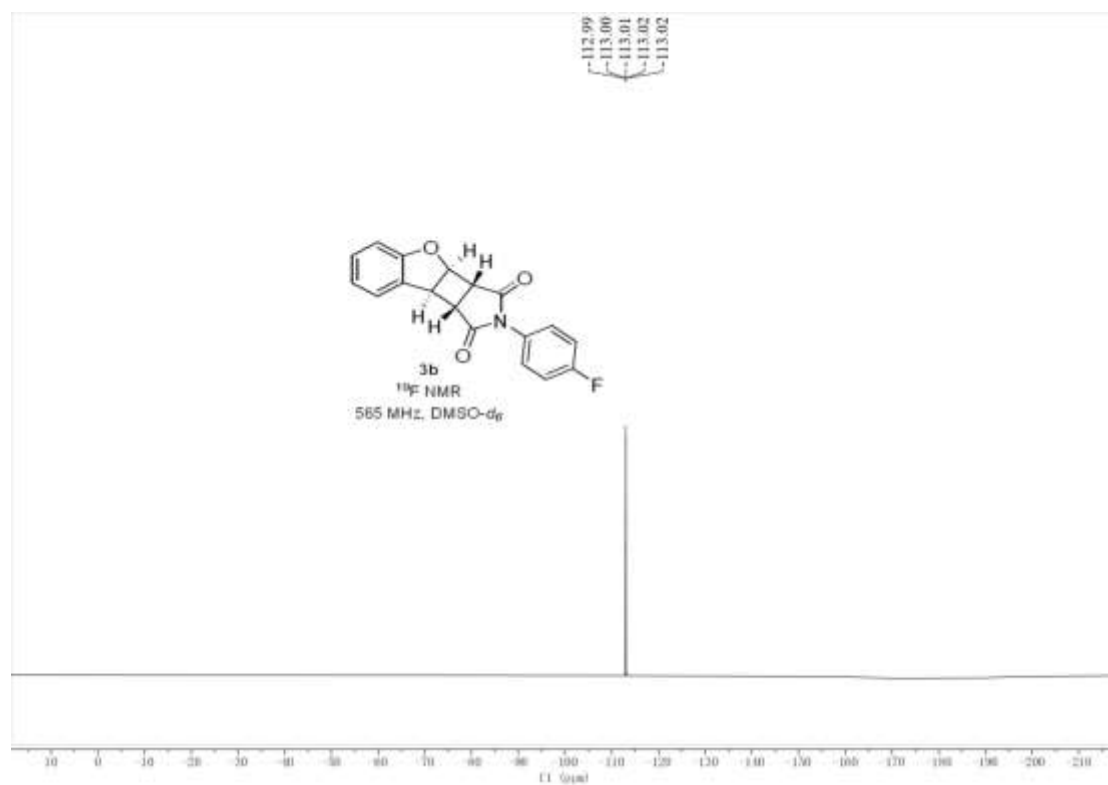

### <sup>1</sup>H NMR Spectrum of 3b'

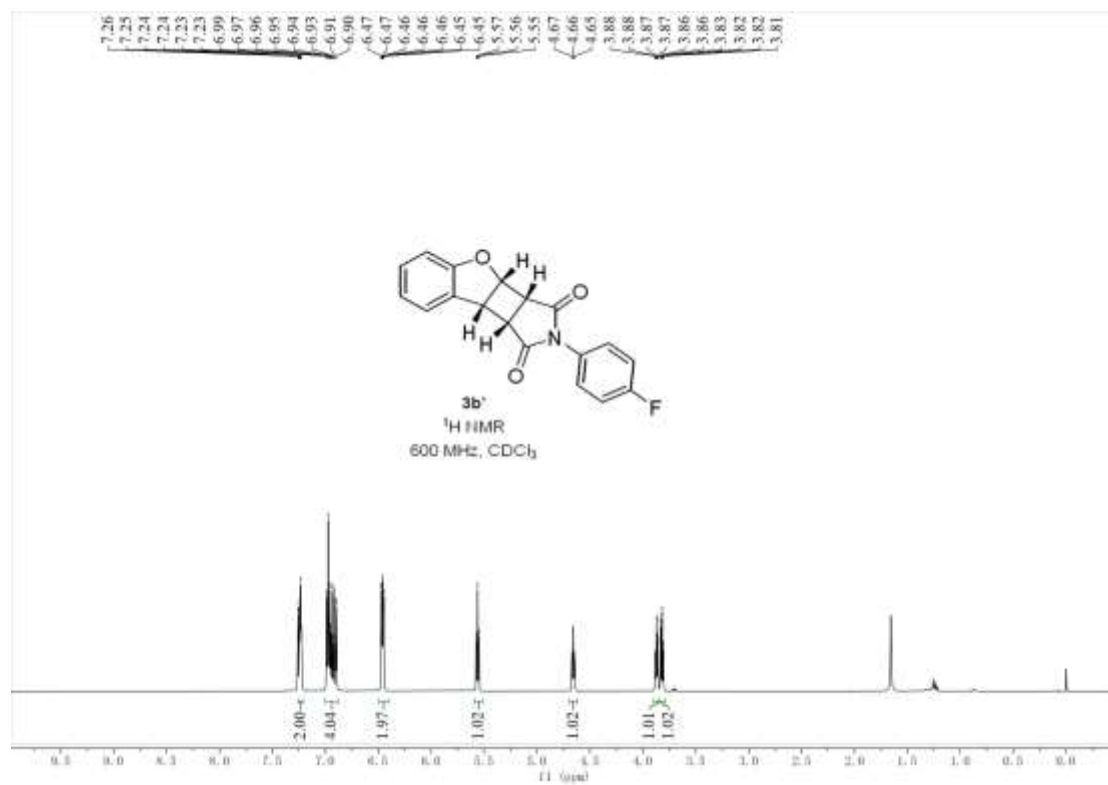



### $^{13}\text{C}\{^1\text{H}\}$ NMR Spectrum of 3b'

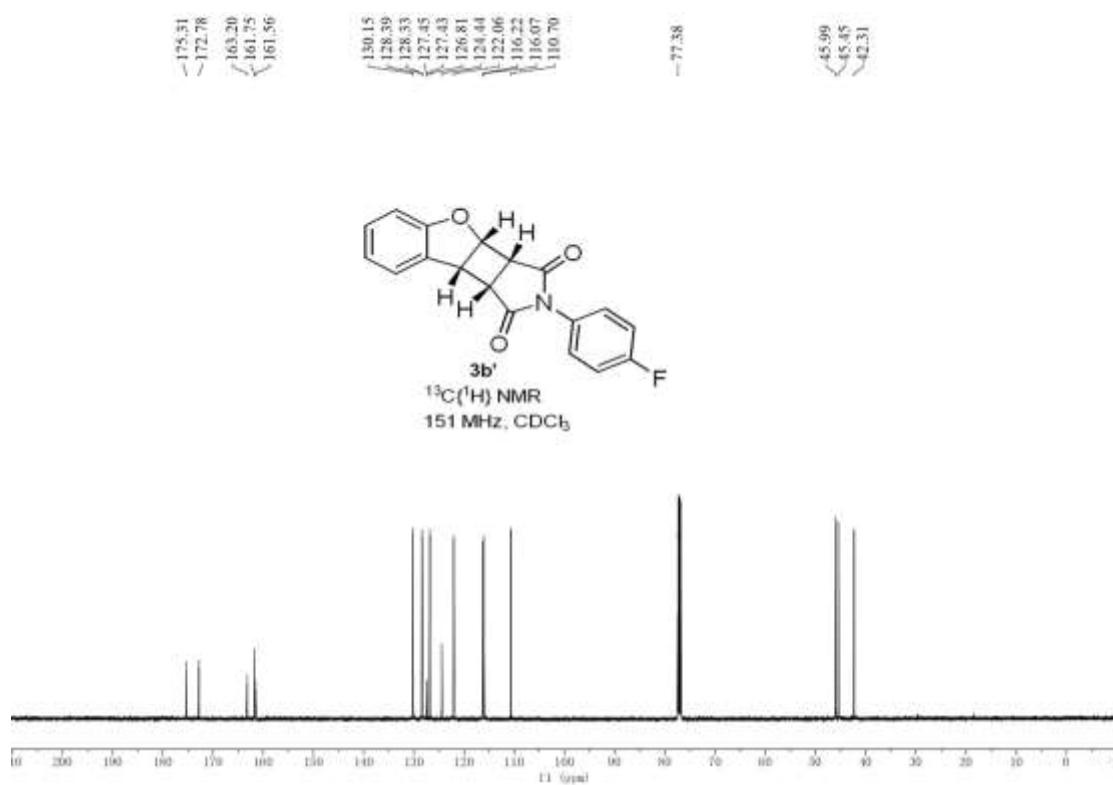

### $^{19}\text{F}$ NMR Spectrum of 3b'

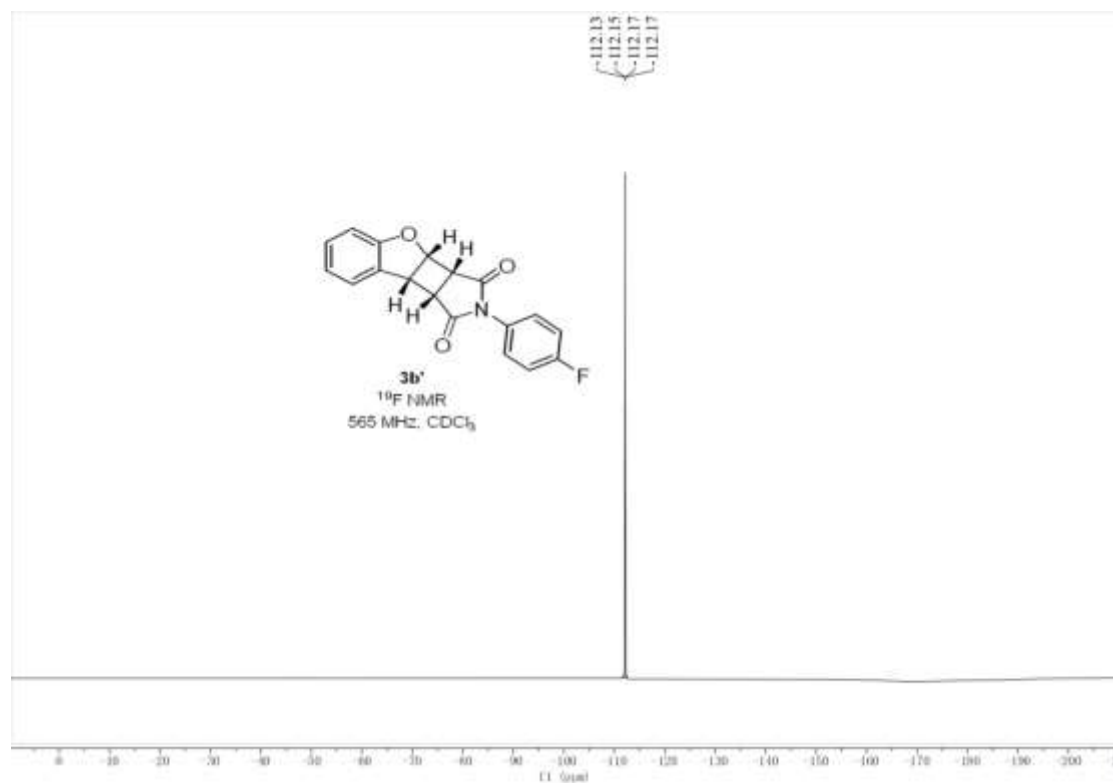

### $^1\text{H}$ NMR Spectrum of 3c

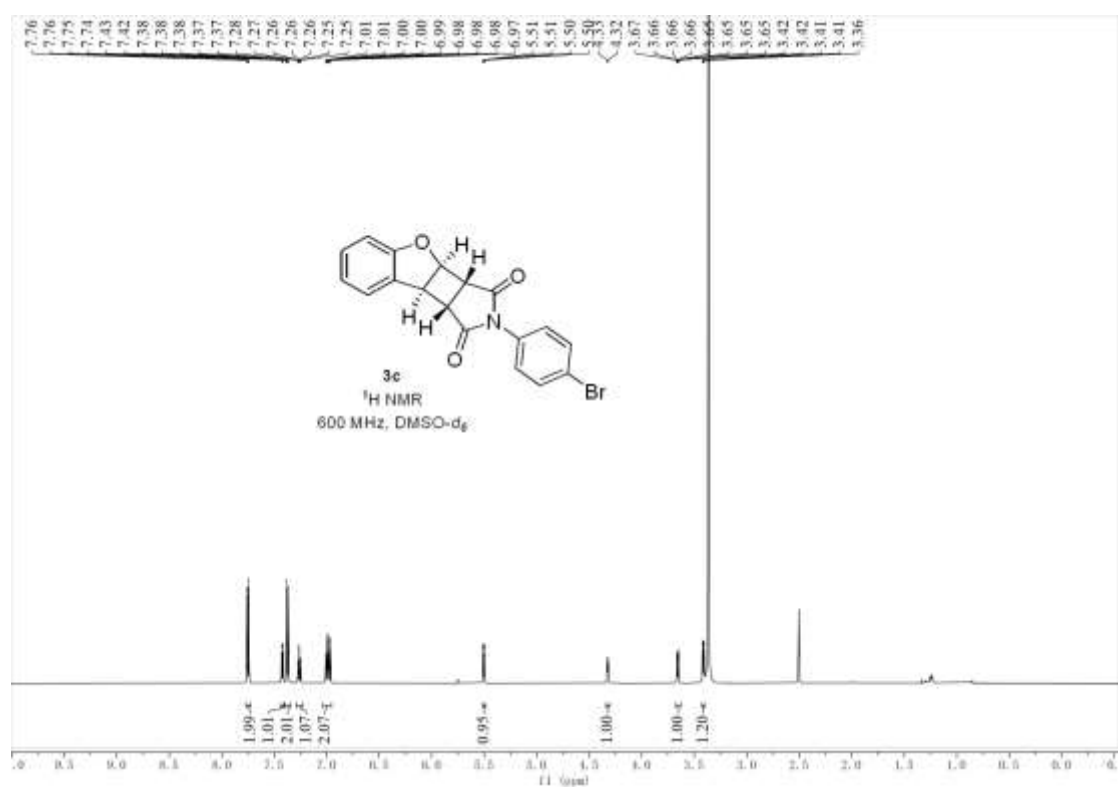

**<sup>13</sup>C{<sup>1</sup>H} NMR Spectrum of 3c**

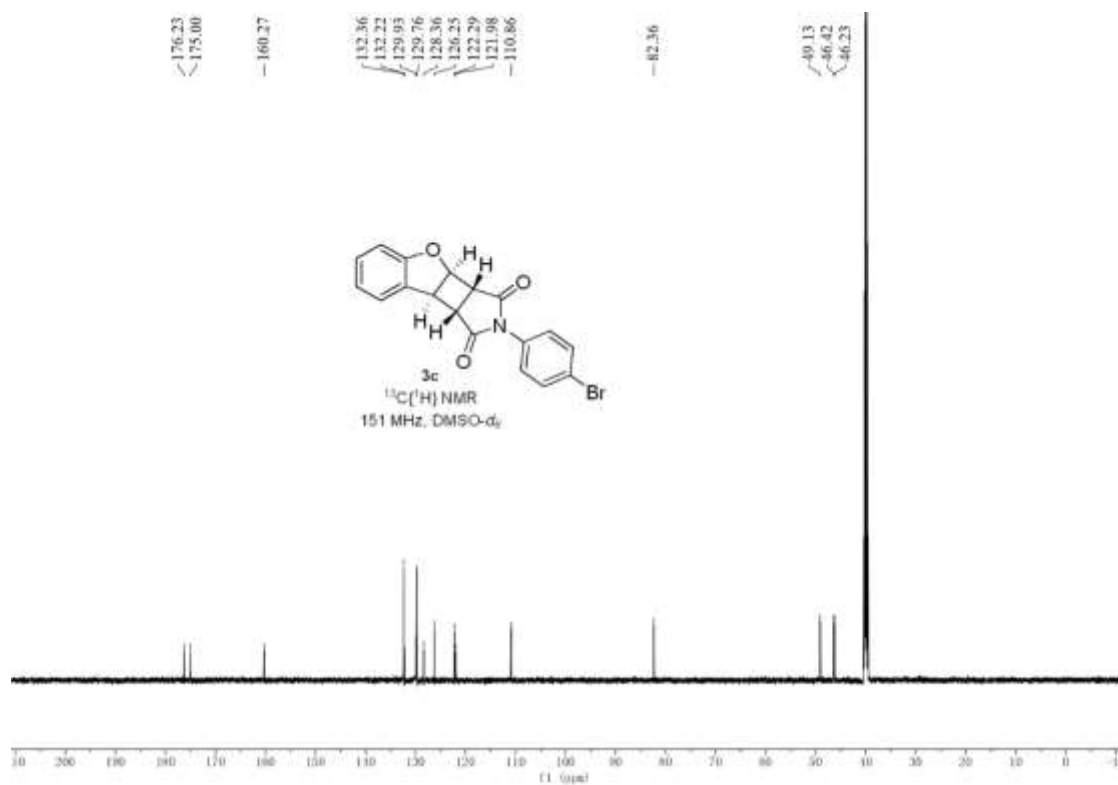

**<sup>1</sup>H NMR Spectrum of 3c'**

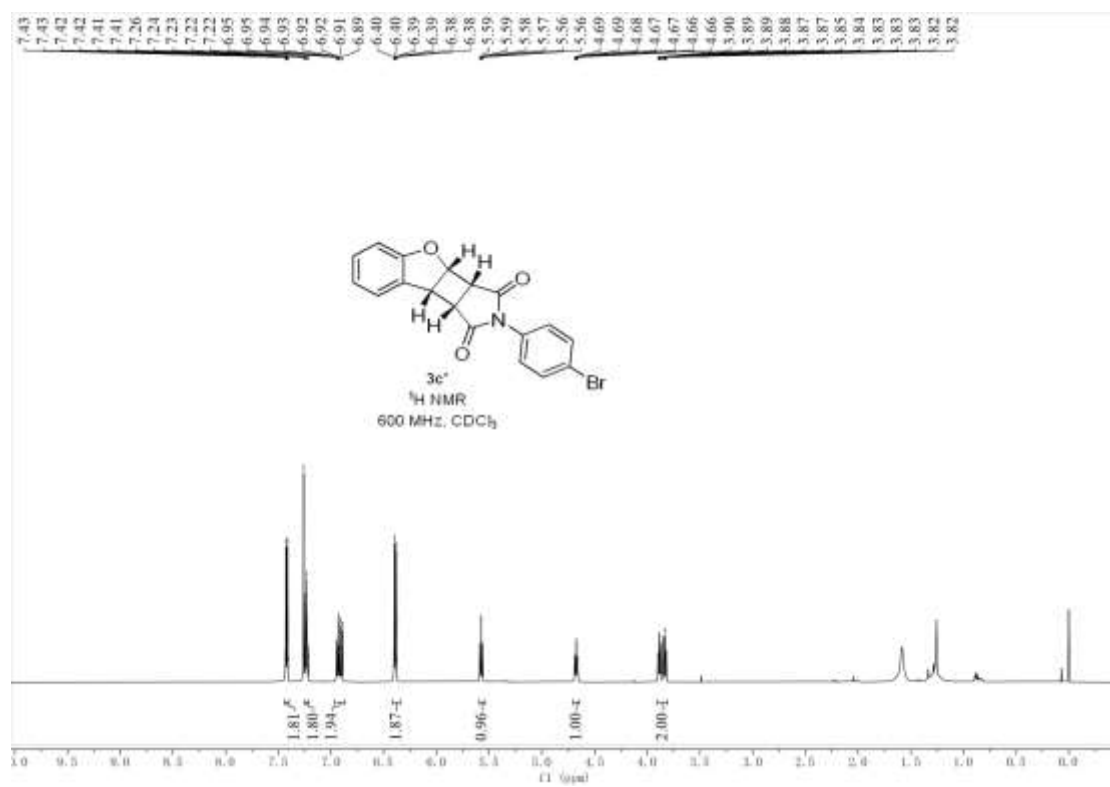

**<sup>13</sup>C{<sup>1</sup>H} NMR Spectrum of 3c'**

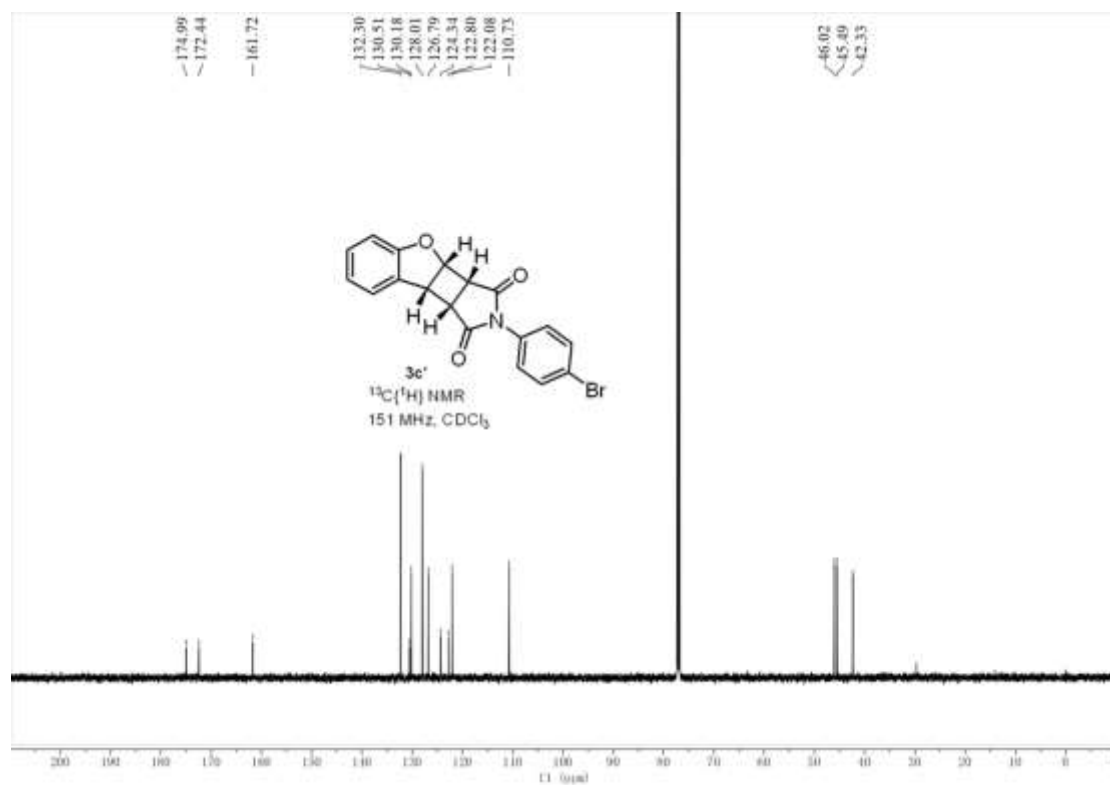

**<sup>1</sup>H NMR Spectrum of 3d**

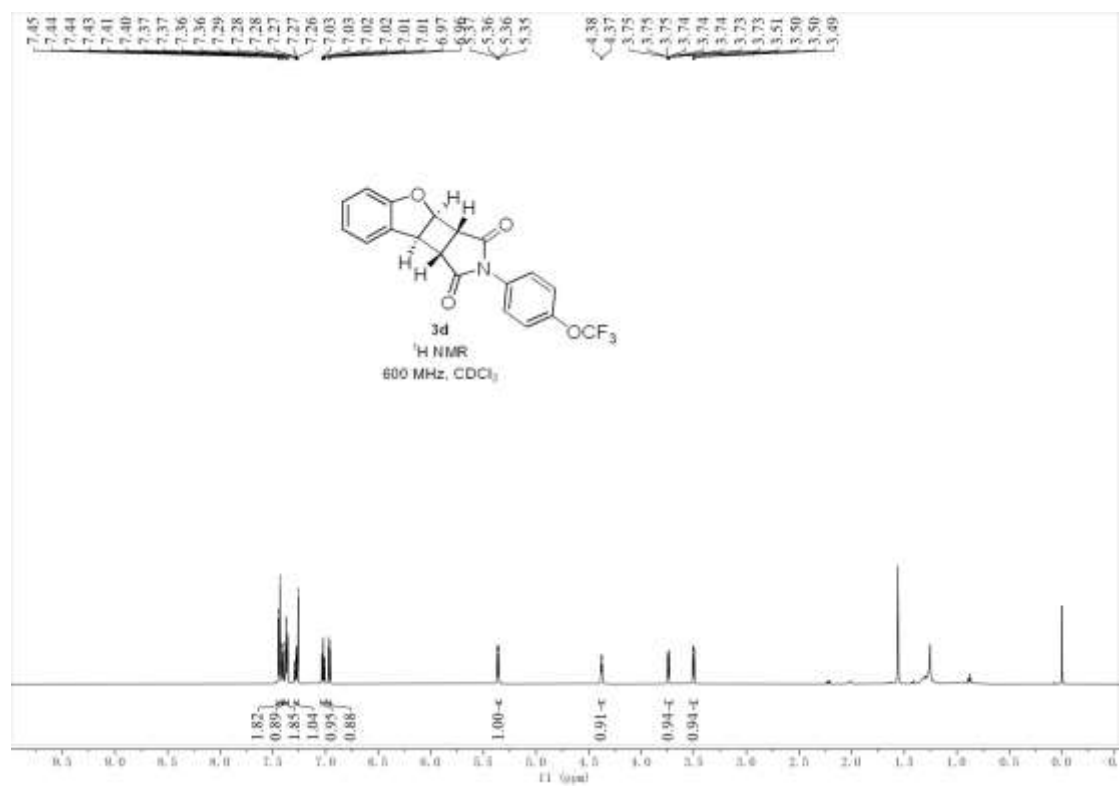

**<sup>13</sup>C{<sup>1</sup>H} NMR Spectrum of 3d**

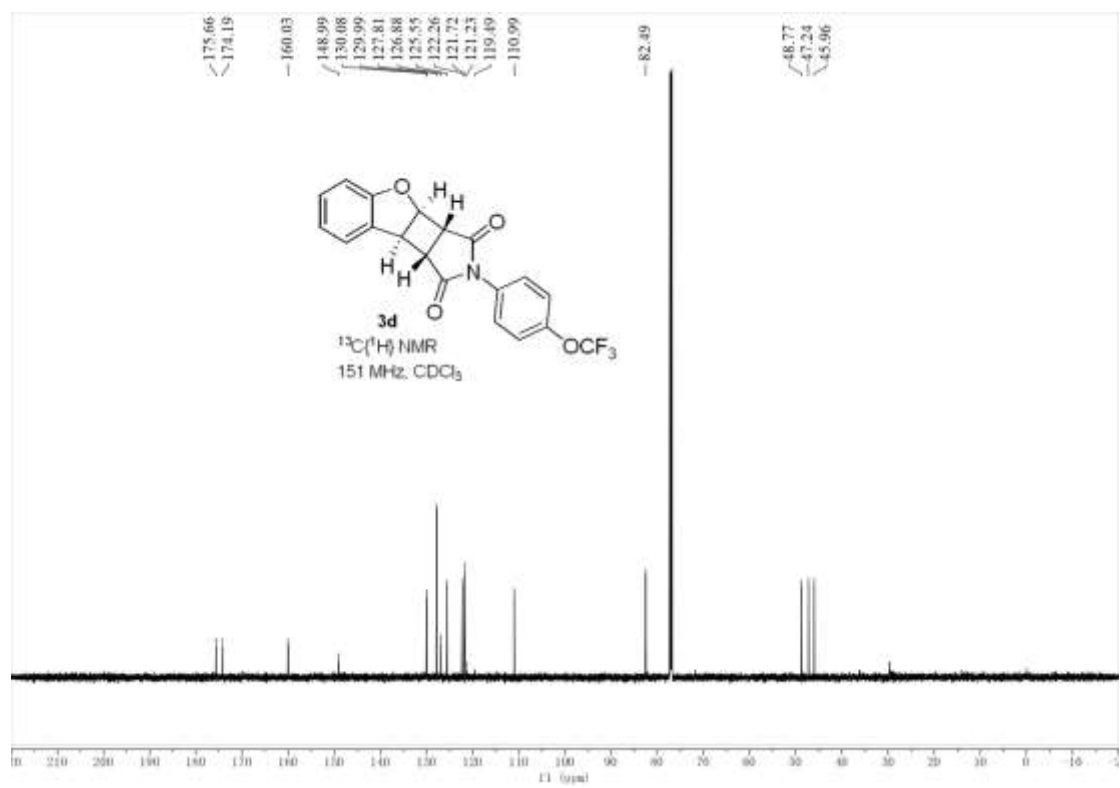

**<sup>19</sup>F NMR Spectrum of 3d**

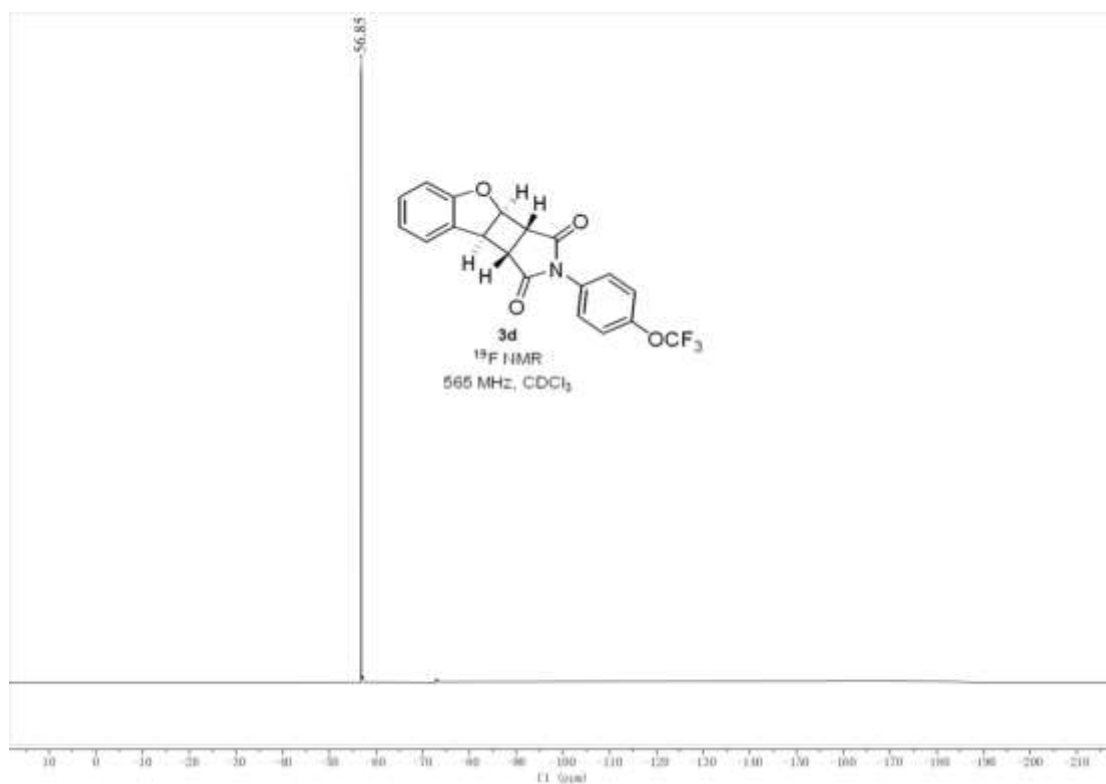

### <sup>1</sup>H NMR Spectrum of 3d'

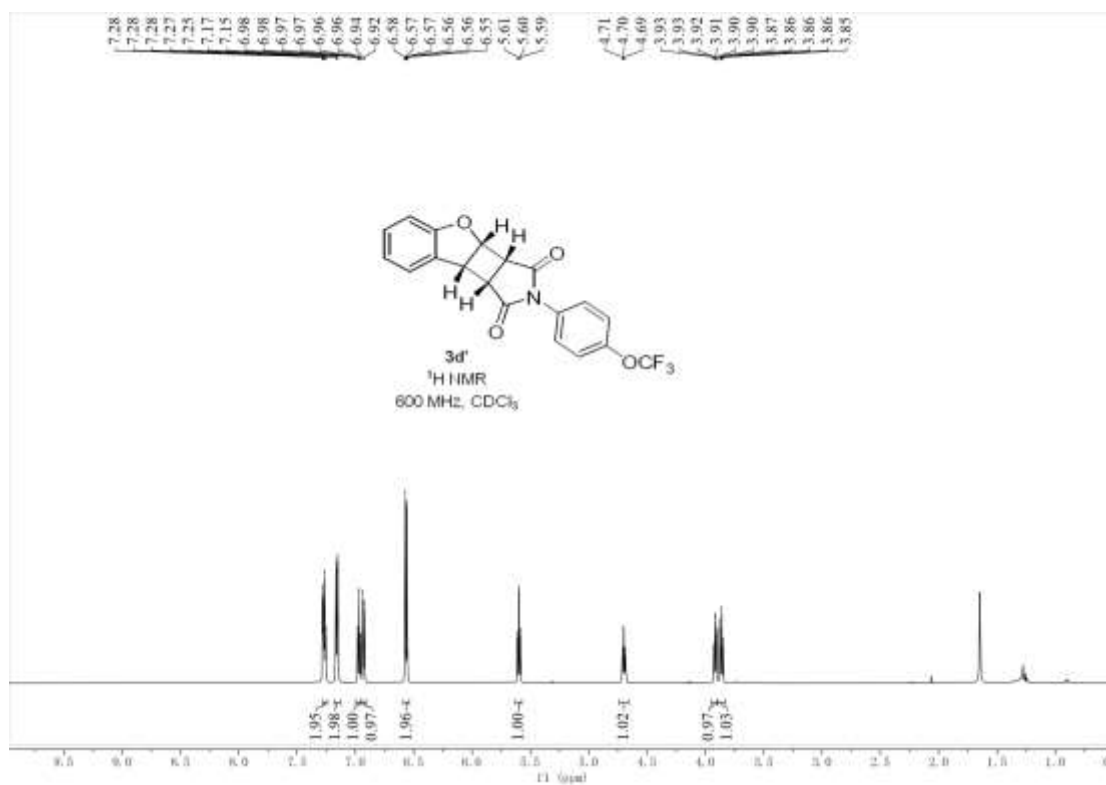

### <sup>13</sup>C{<sup>1</sup>H} NMR Spectrum of 3d'

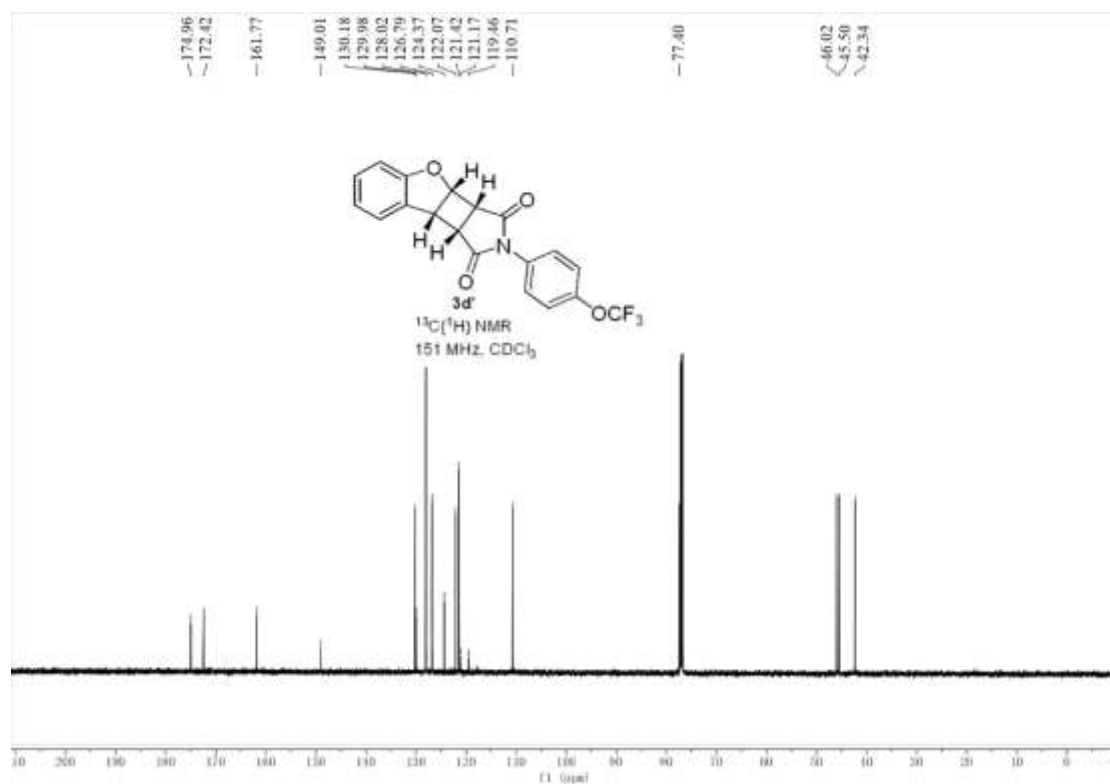

### <sup>19</sup>F NMR Spectrum of 3d'

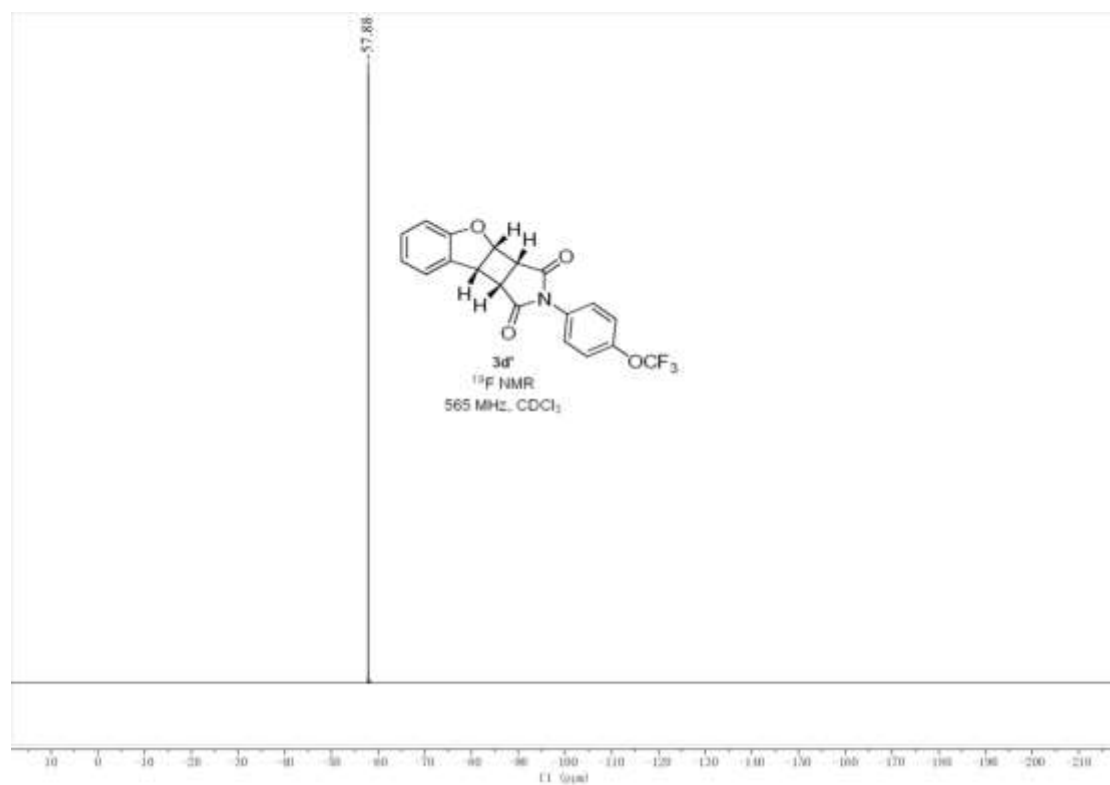

### <sup>1</sup>H NMR Spectrum of 3e

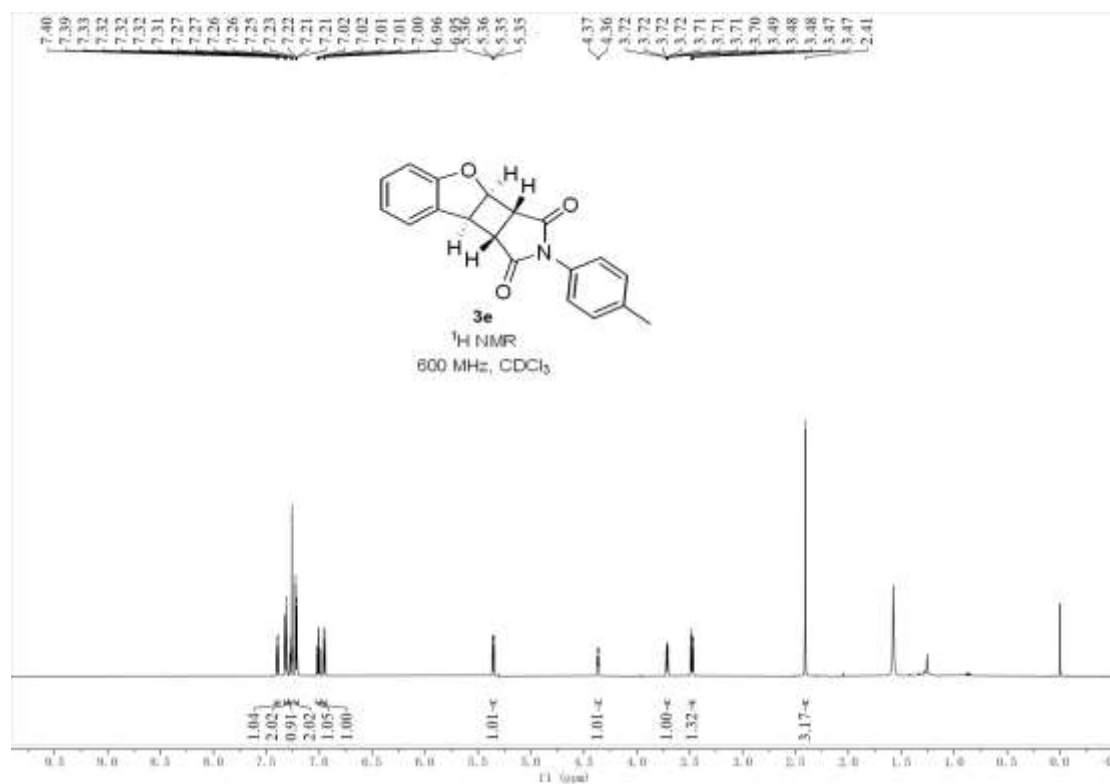

**<sup>13</sup>C{<sup>1</sup>H} NMR Spectrum of 3e**

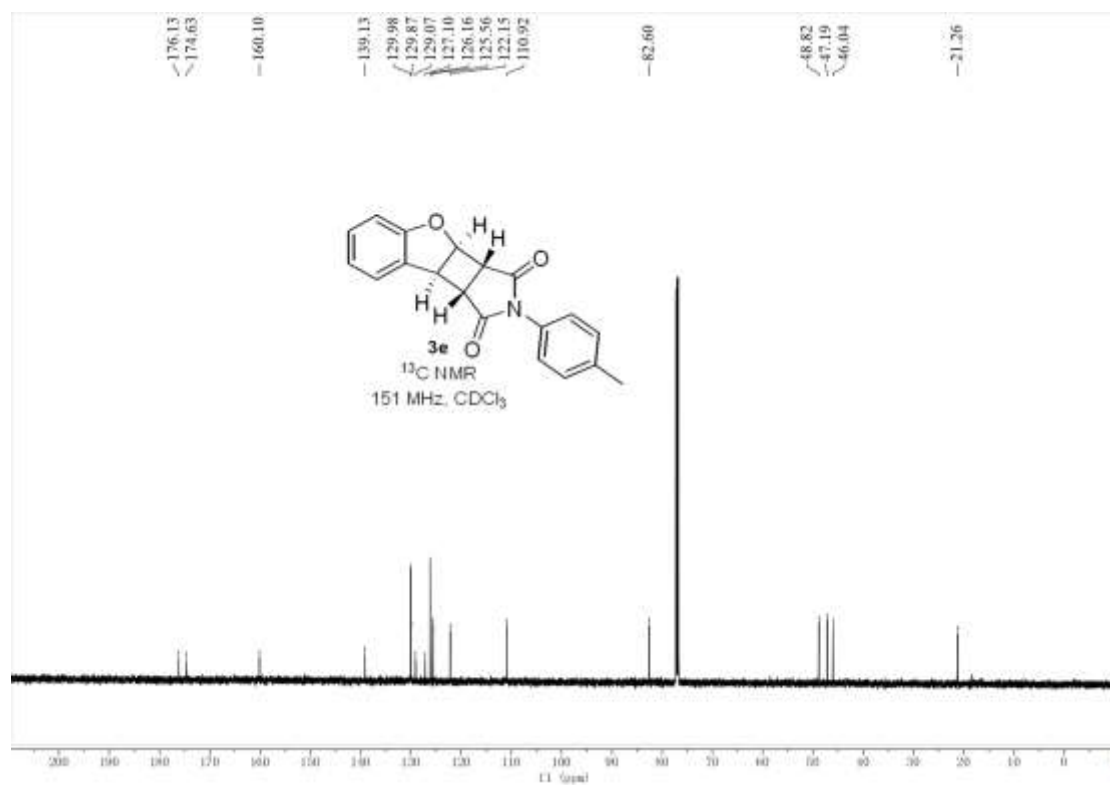

**<sup>1</sup>H NMR Spectrum of 3e'**

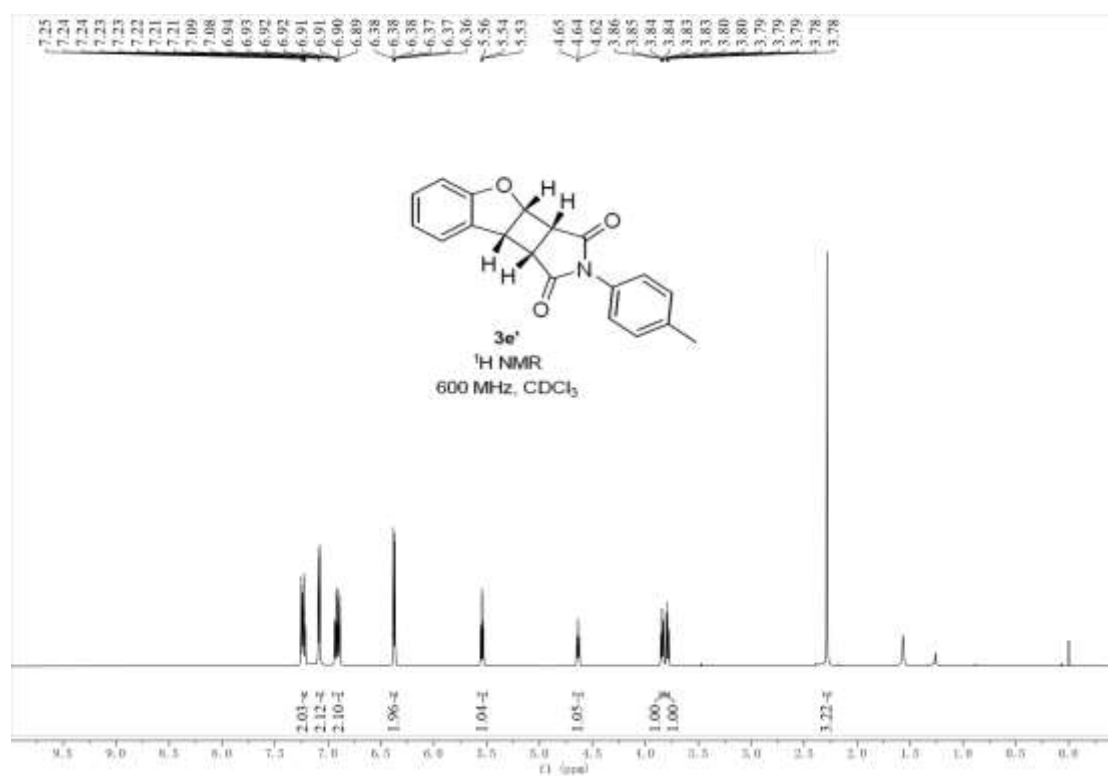

**<sup>13</sup>C{<sup>1</sup>H} NMR Spectrum of 3e'**

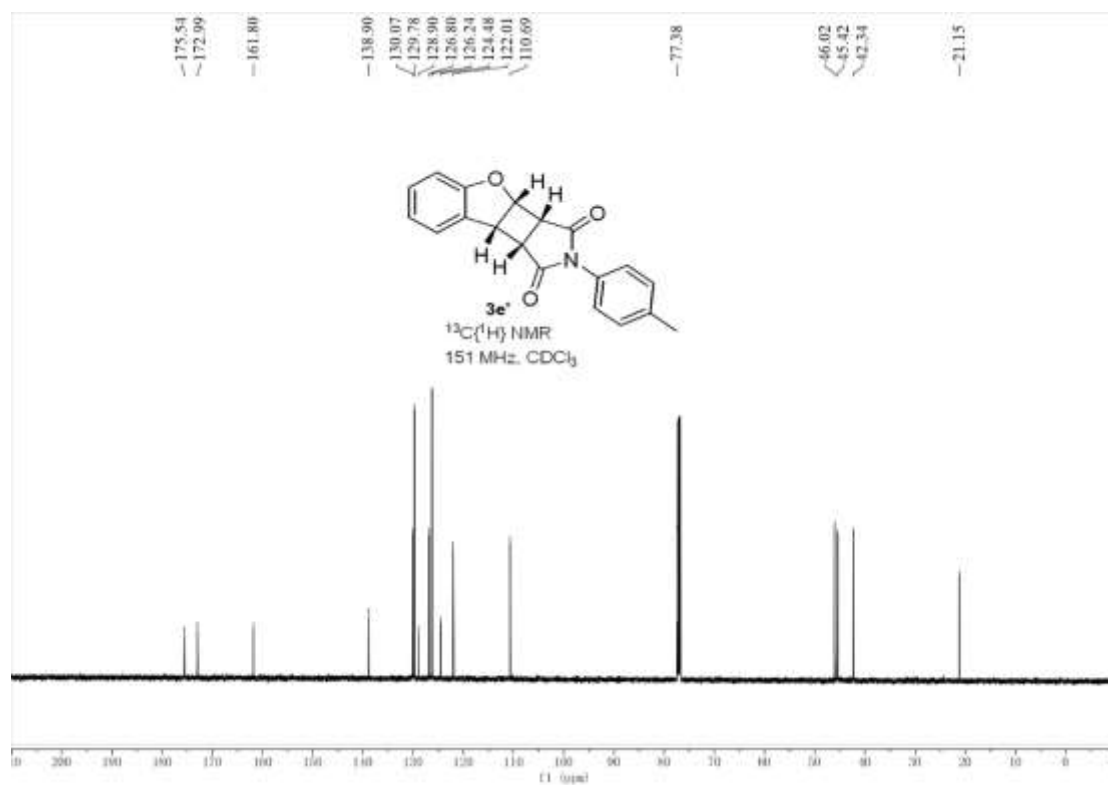

**<sup>1</sup>H NMR Spectrum of 3f**



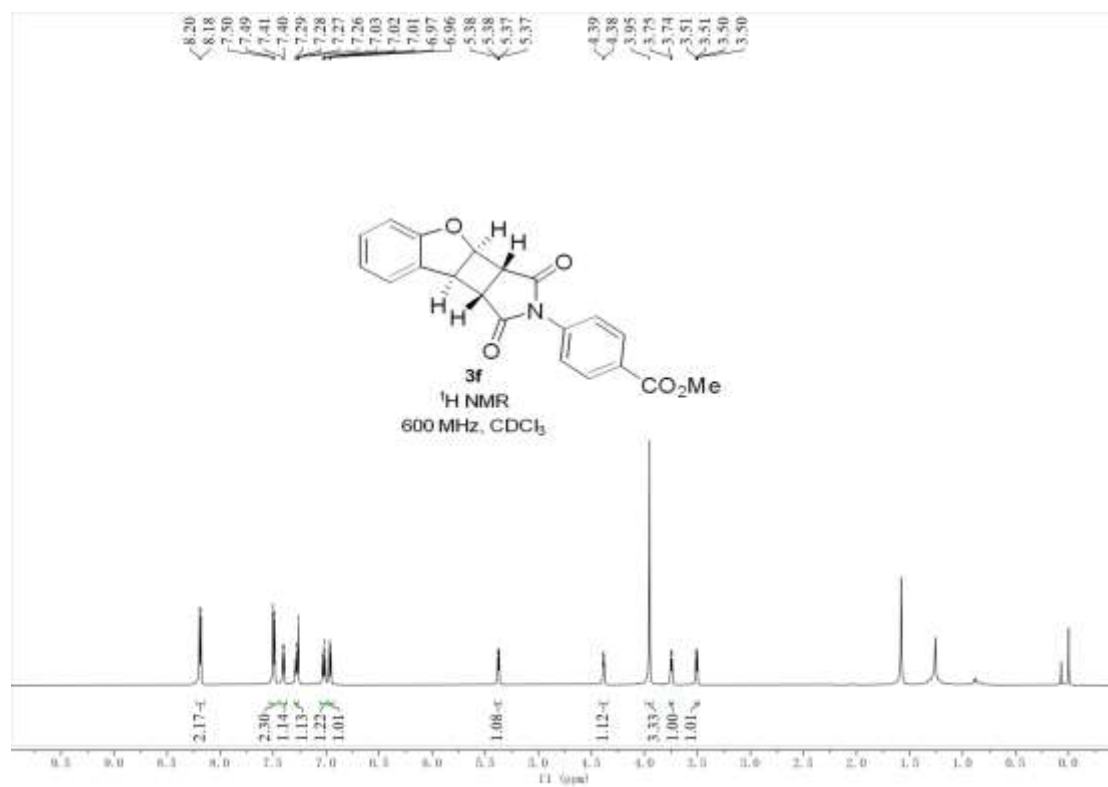

**<sup>13</sup>C {<sup>1</sup>H} NMR Spectrum of 3f**

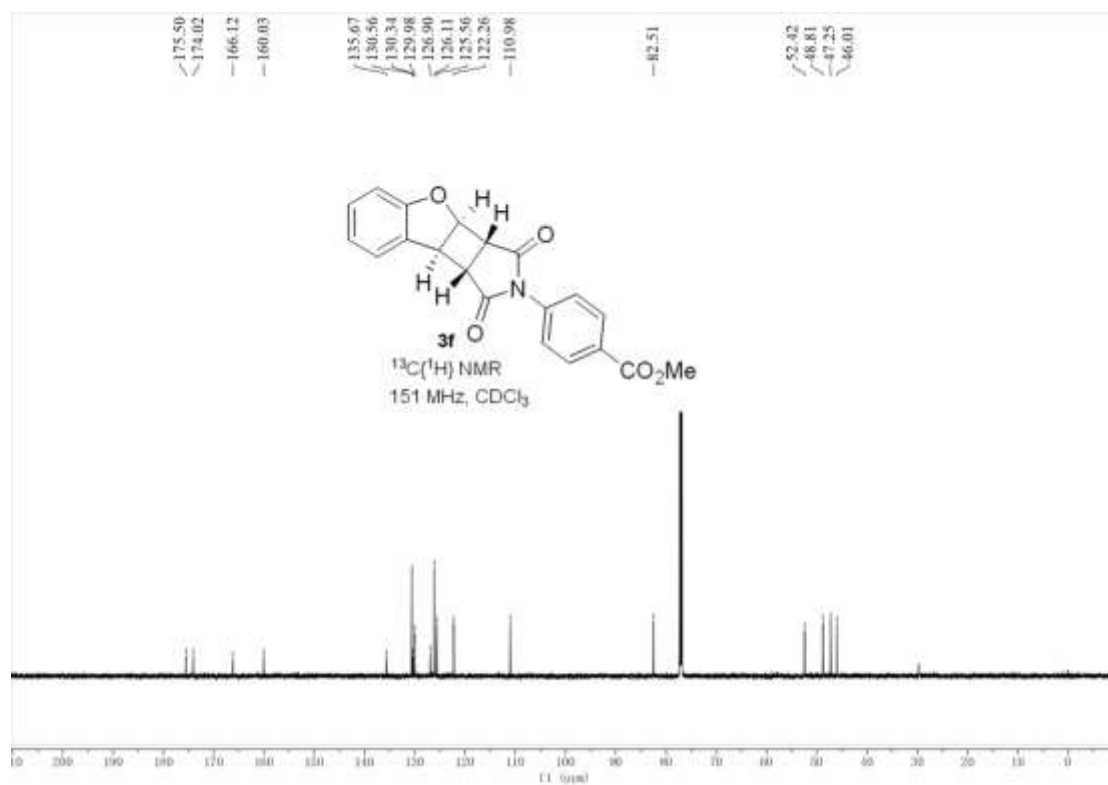

**<sup>1</sup>H NMR Spectrum of 3f'**

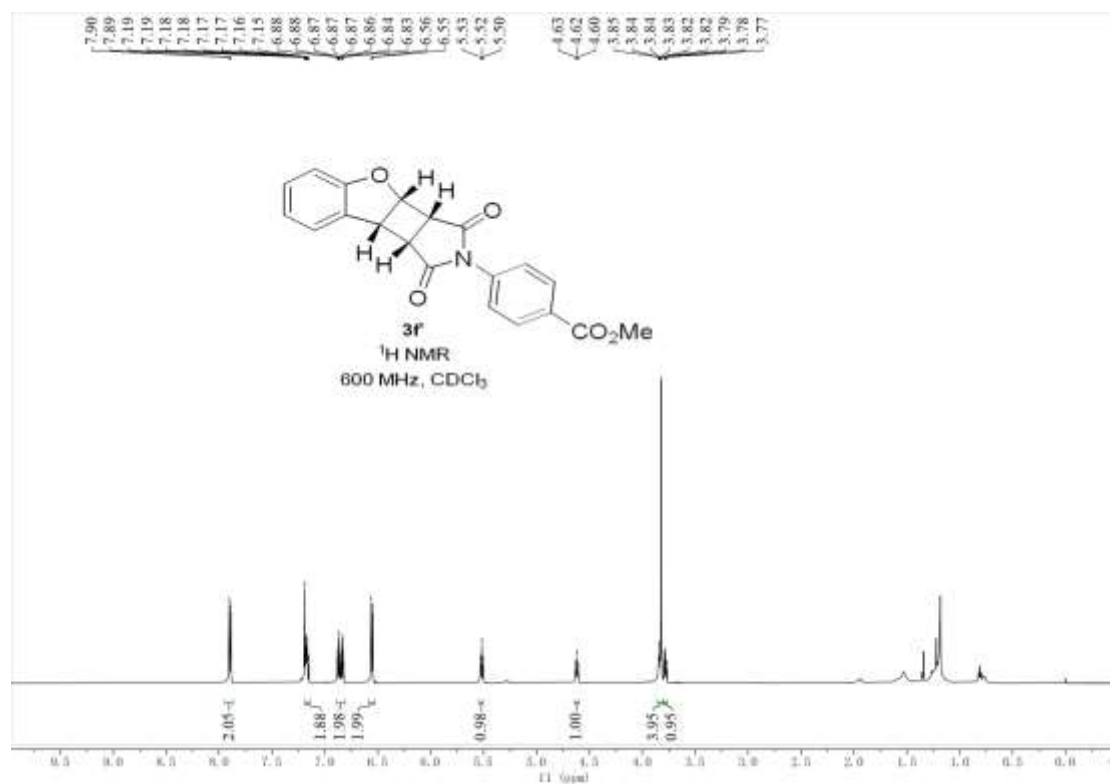

**<sup>13</sup>C{<sup>1</sup>H} NMR Spectrum of 3f**

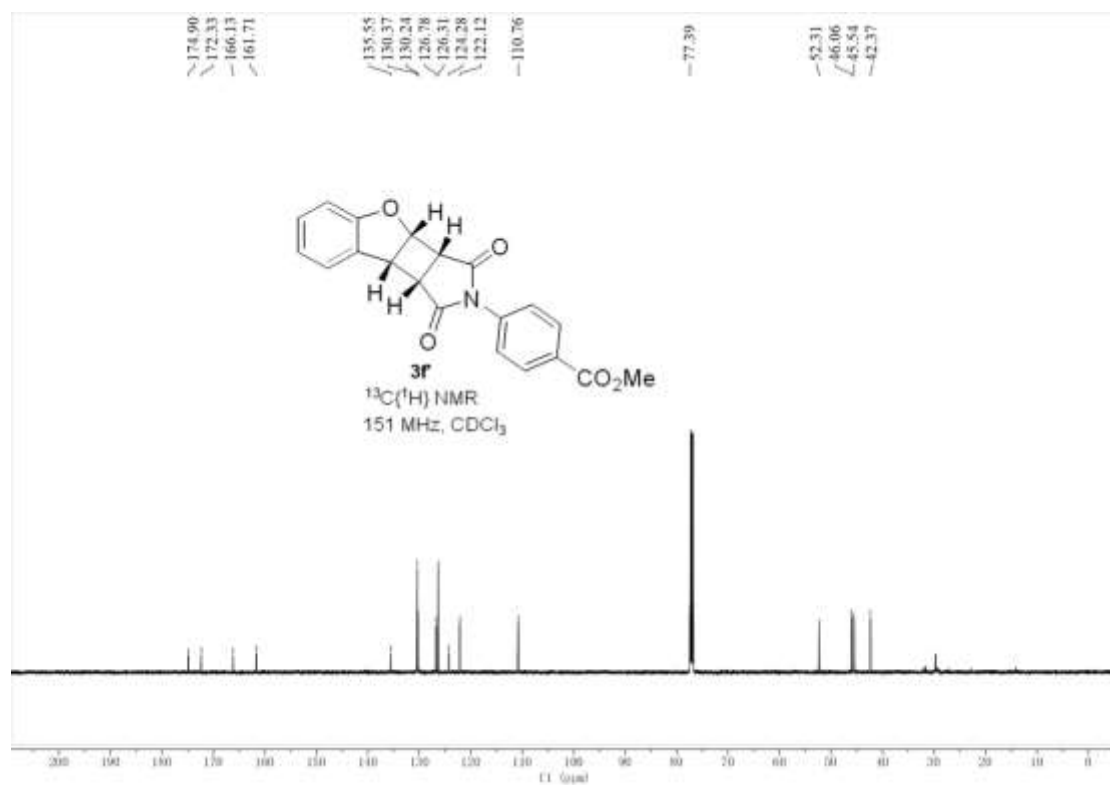

**<sup>1</sup>H NMR Spectrum of 3g**

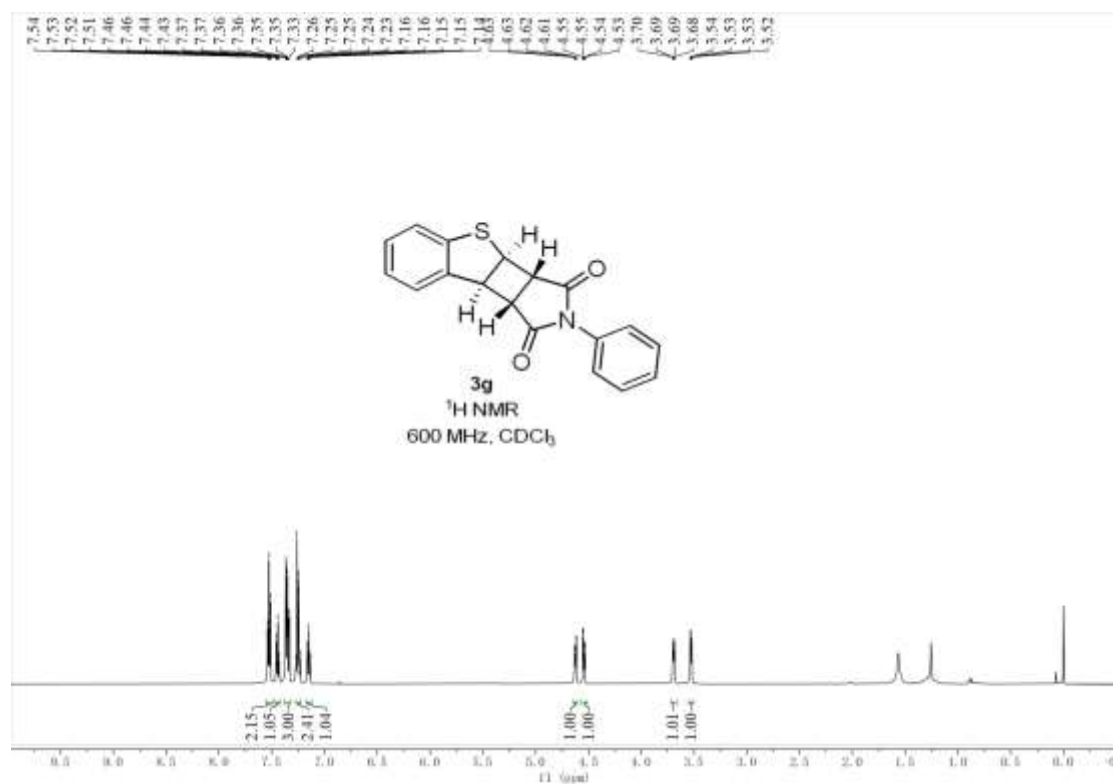

**<sup>13</sup>C{<sup>1</sup>H} NMR Spectrum of 3g**

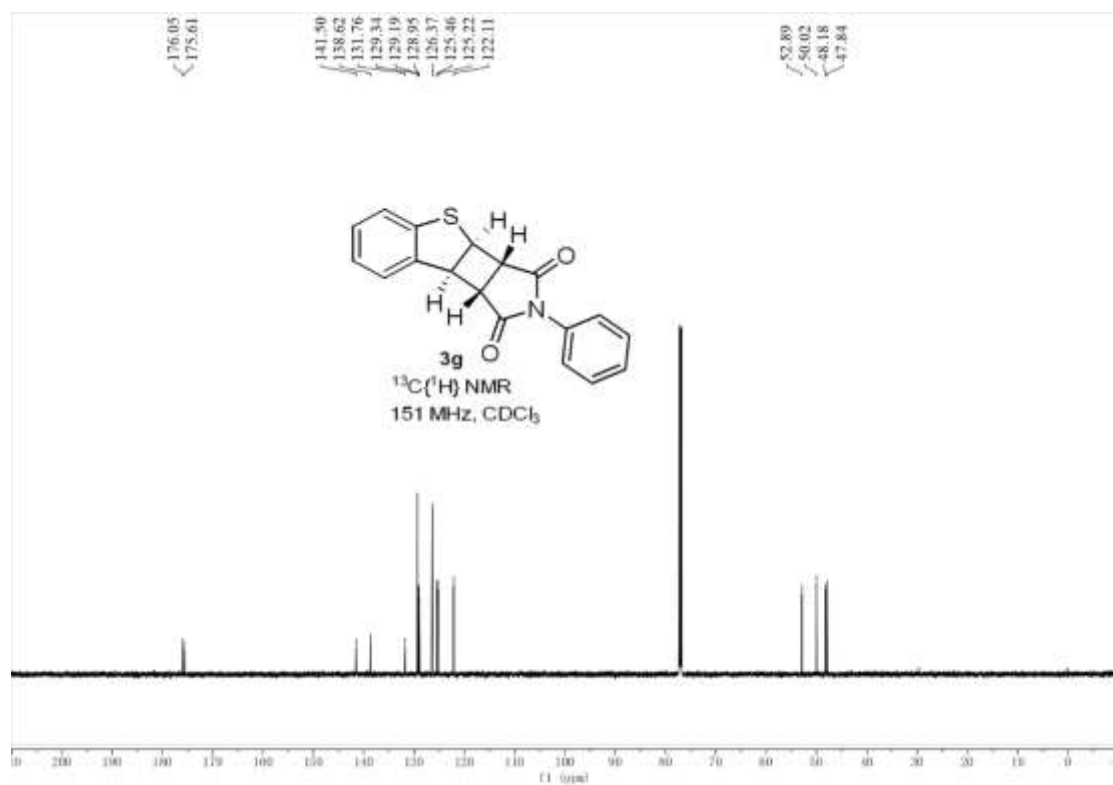

**<sup>1</sup>H NMR Spectrum of 3g'**

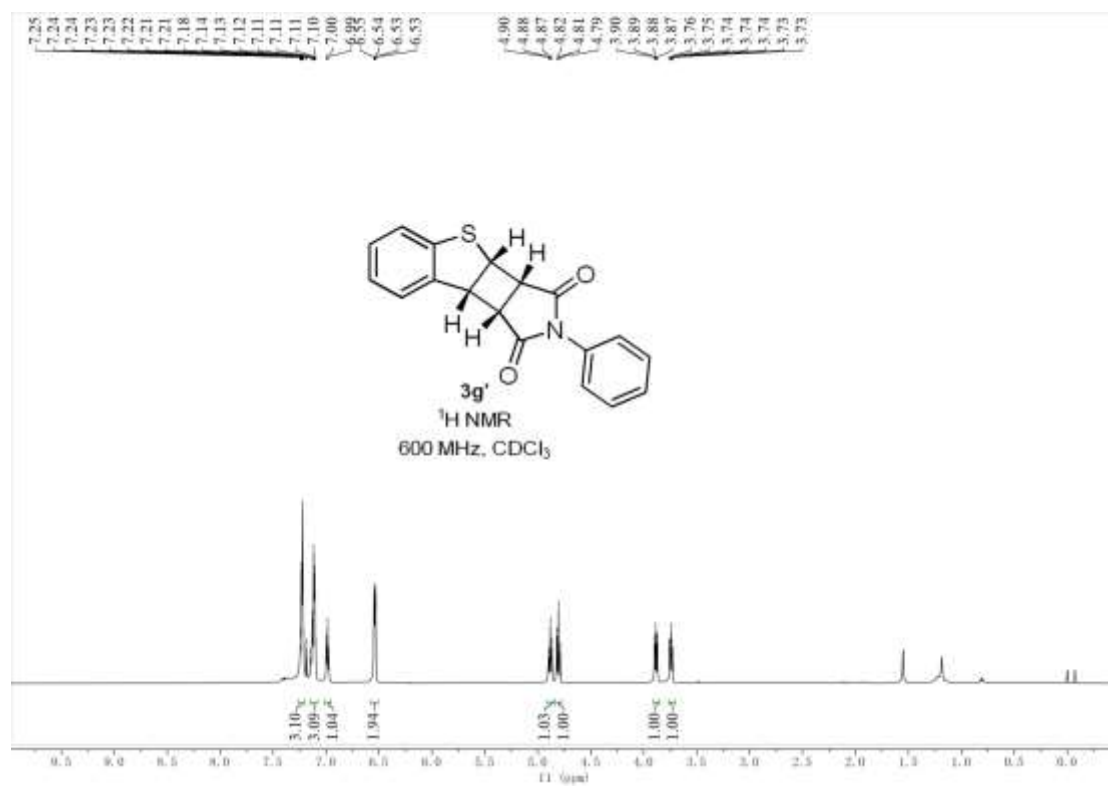

**<sup>13</sup>C{<sup>1</sup>H} NMR Spectrum of 3g'**

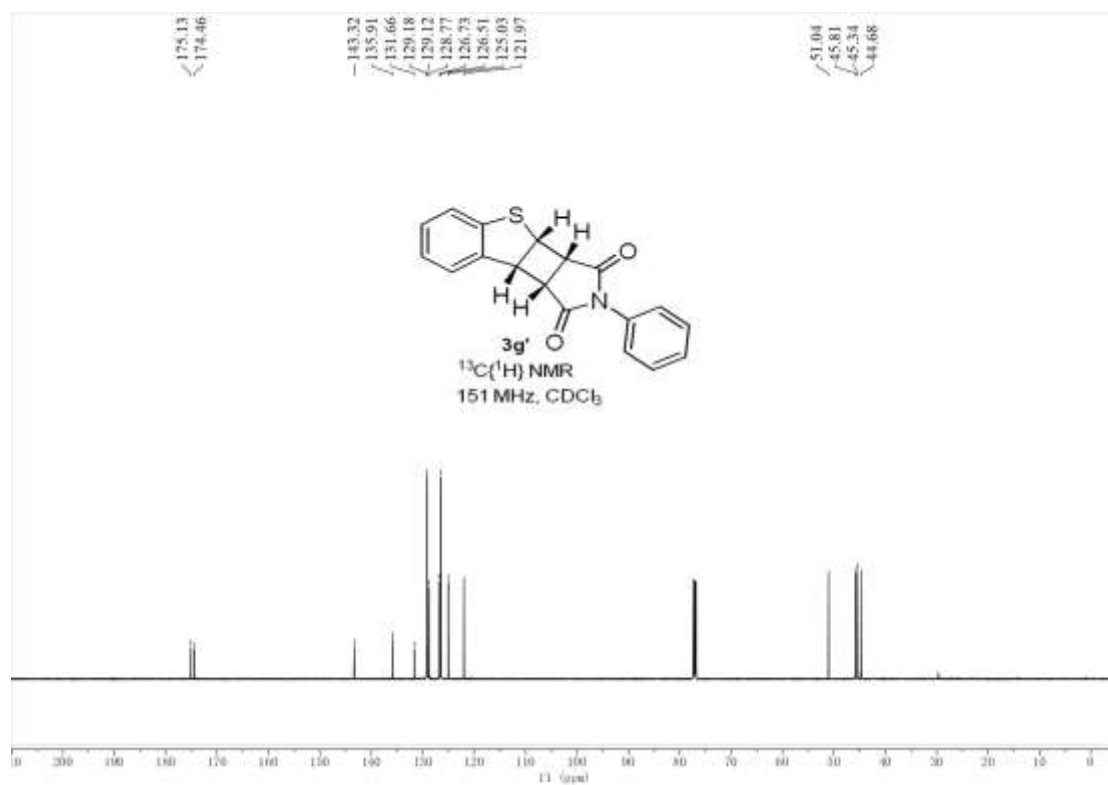

**<sup>1</sup>H NMR Spectrum of 3h**

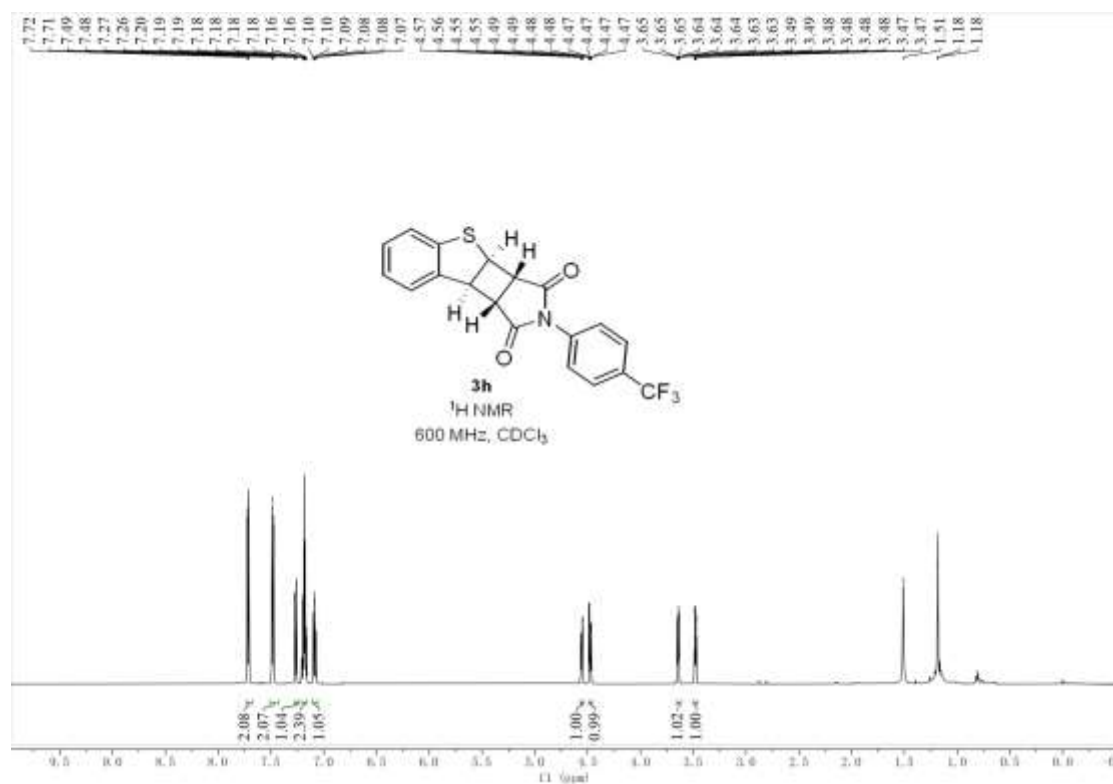

**<sup>13</sup>C{<sup>1</sup>H} NMR Spectrum of 3h**

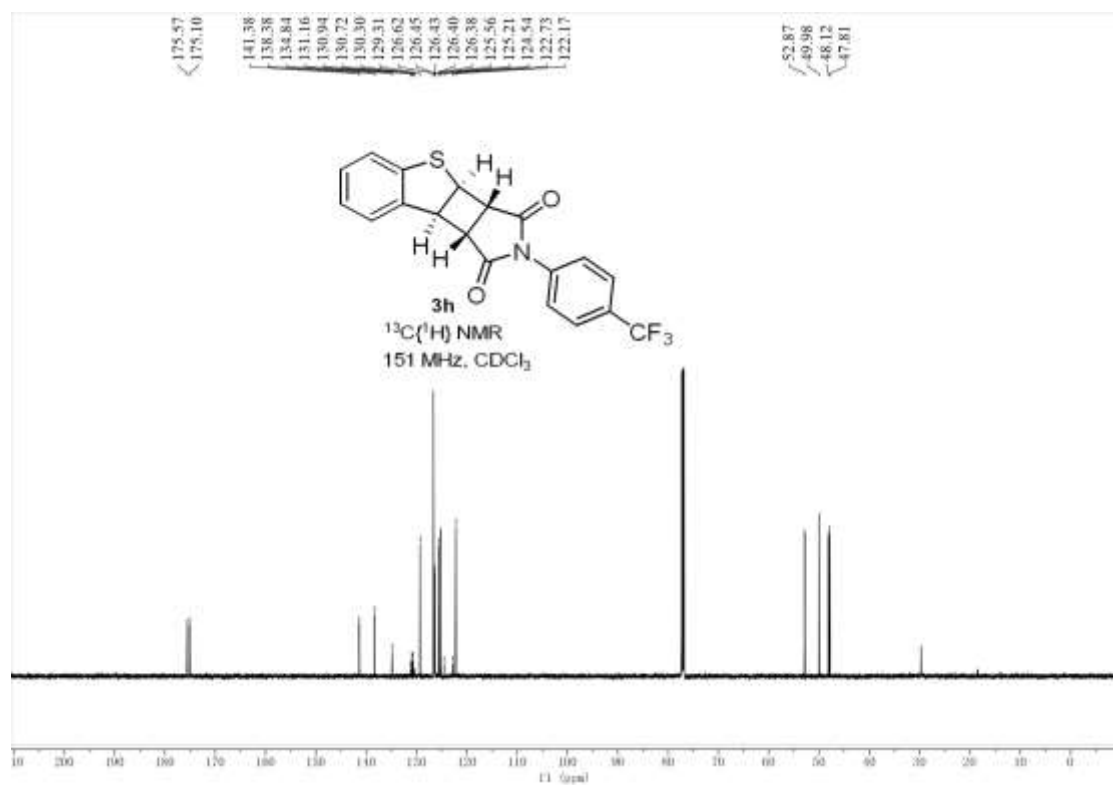

**<sup>19</sup>F NMR Spectrum of 3h**

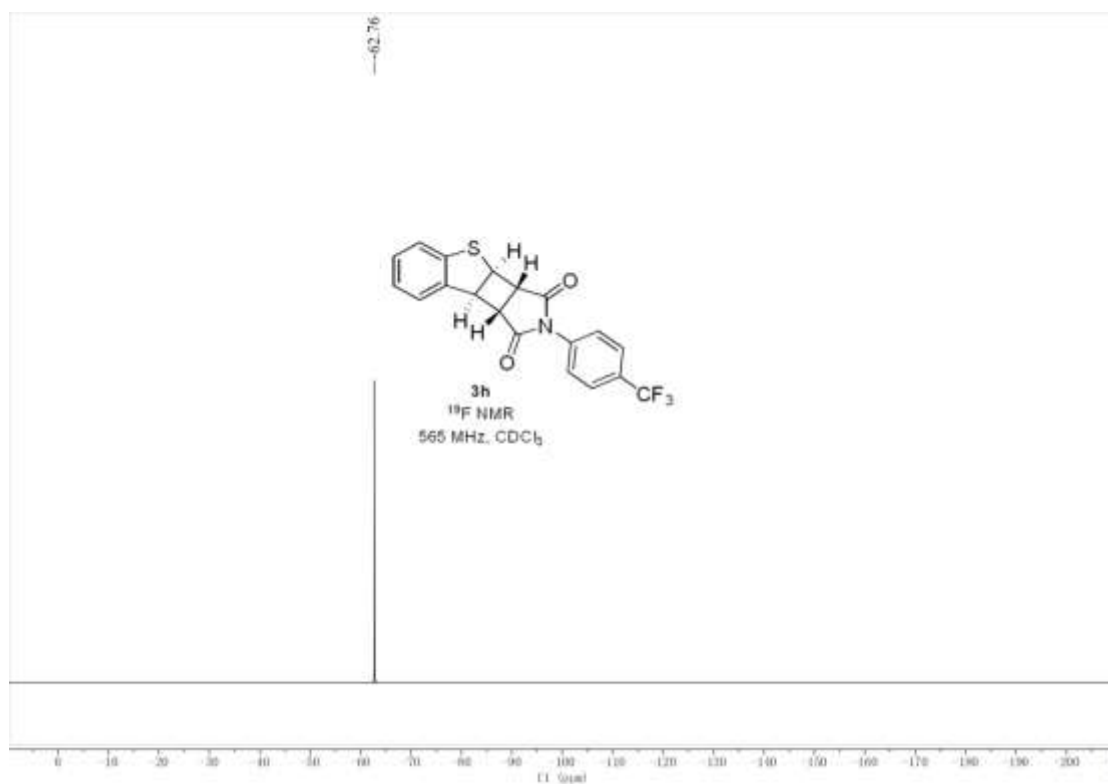

**<sup>1</sup>H NMR Spectrum of 3h'**

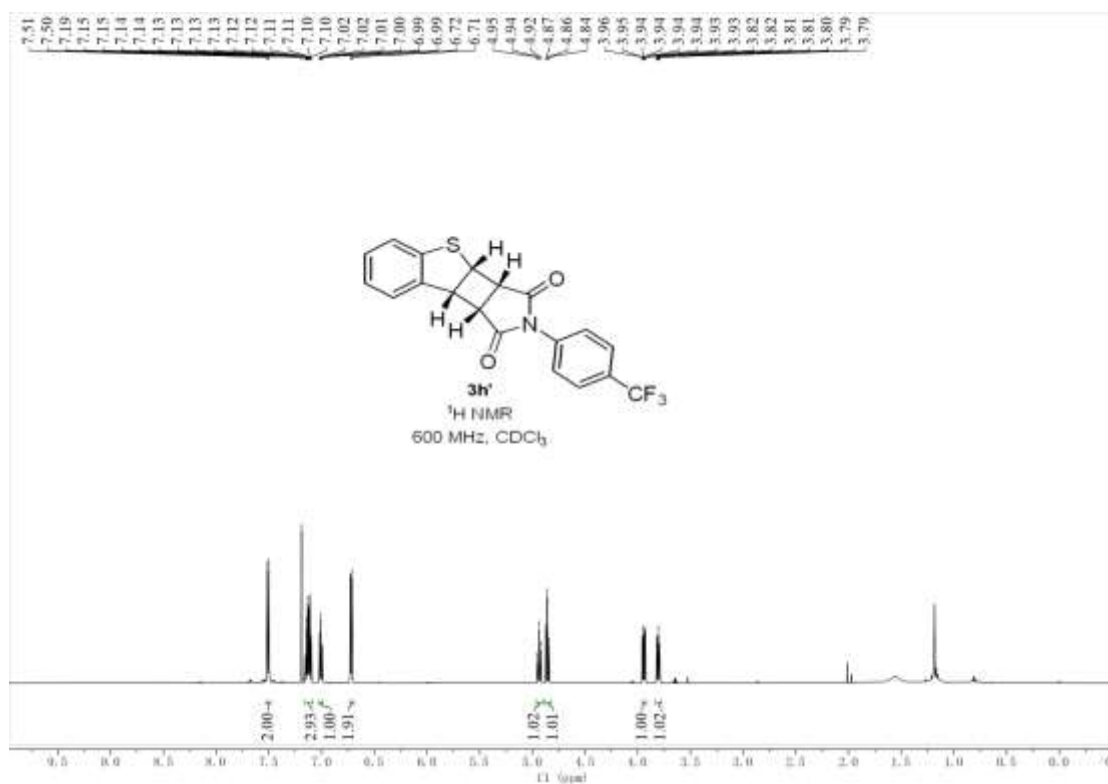

**<sup>13</sup>C{<sup>1</sup>H} NMR Spectrum of 3h'**

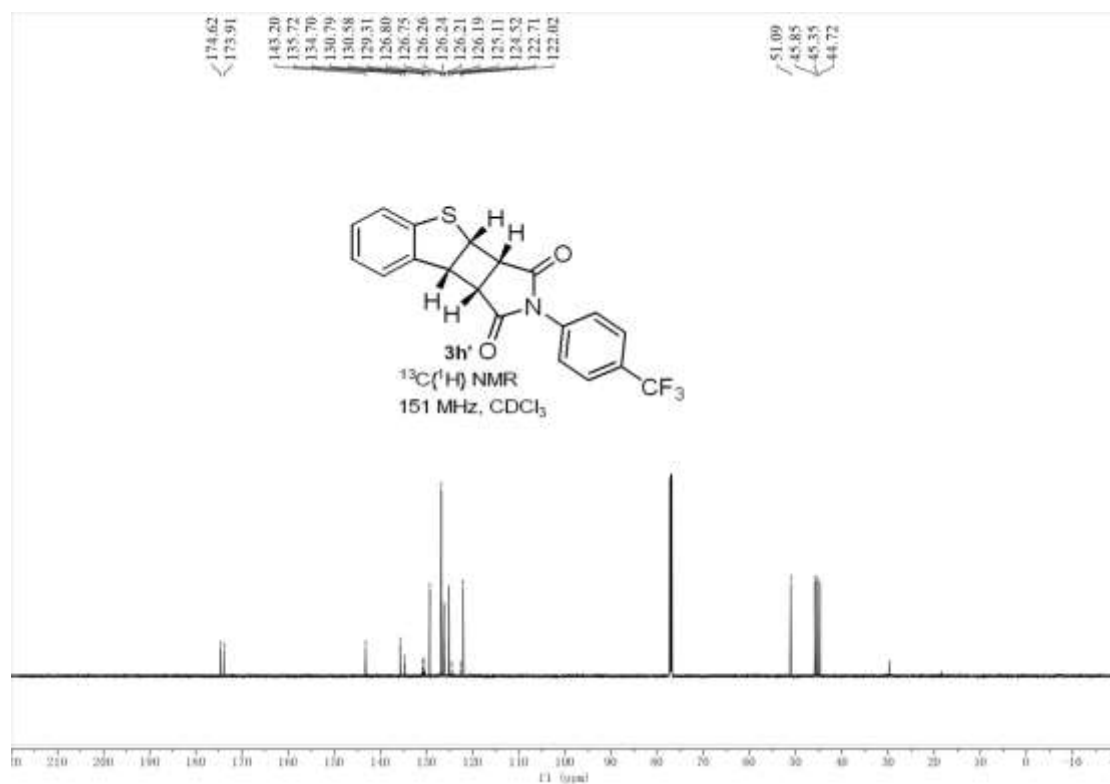

**<sup>19</sup>F NMR Spectrum of 3h'**

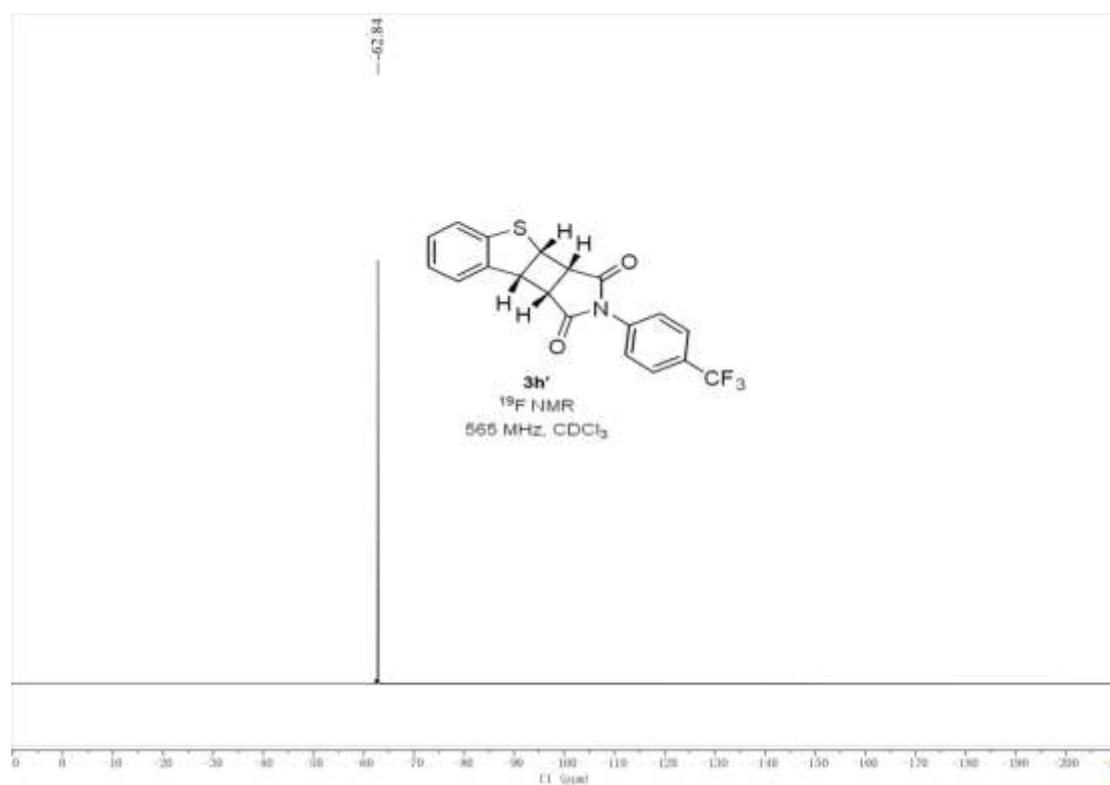

**<sup>1</sup>H NMR Spectrum of 3i**

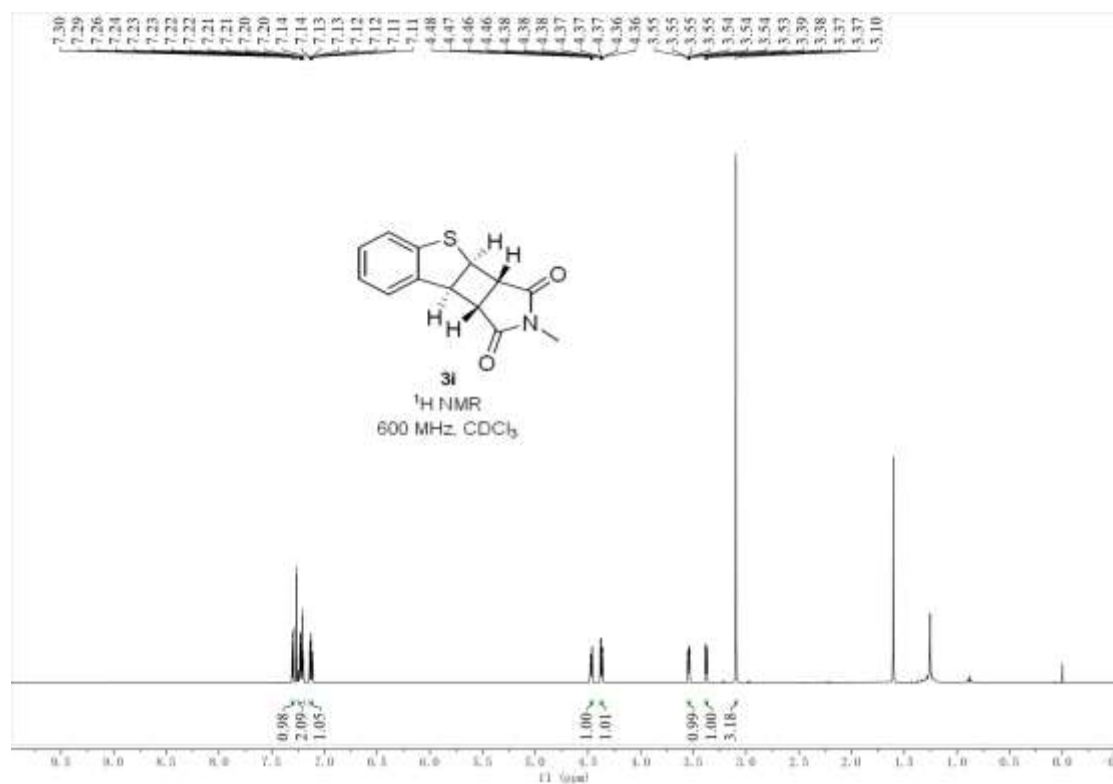

<sup>13</sup>C{<sup>1</sup>H} NMR Spectrum of 3i

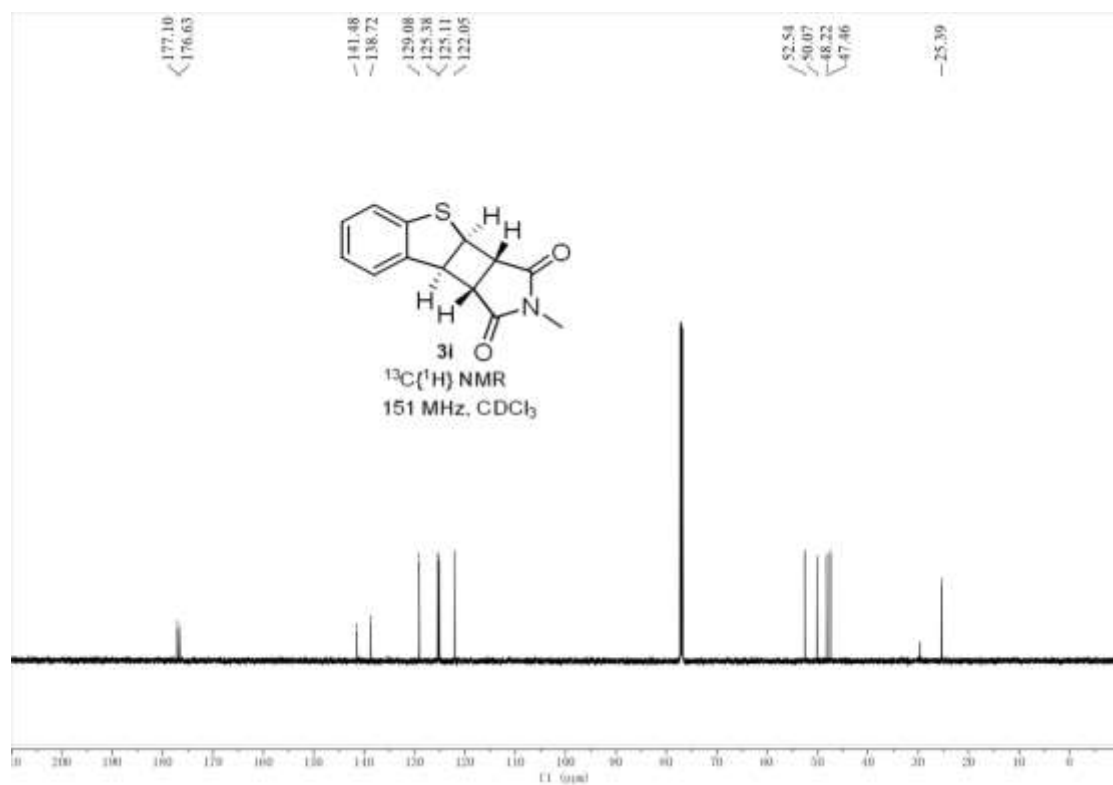

<sup>1</sup>H NMR Spectrum of 3i'



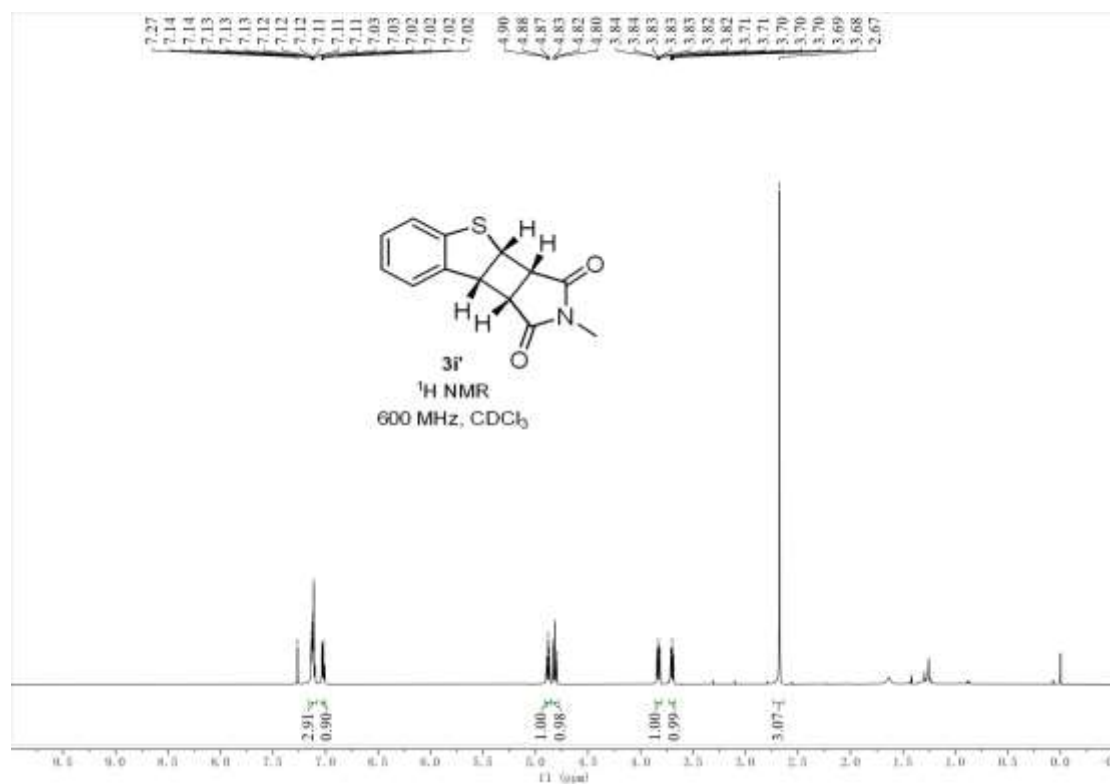

**<sup>13</sup>C{<sup>1</sup>H} NMR Spectrum of 3i'**

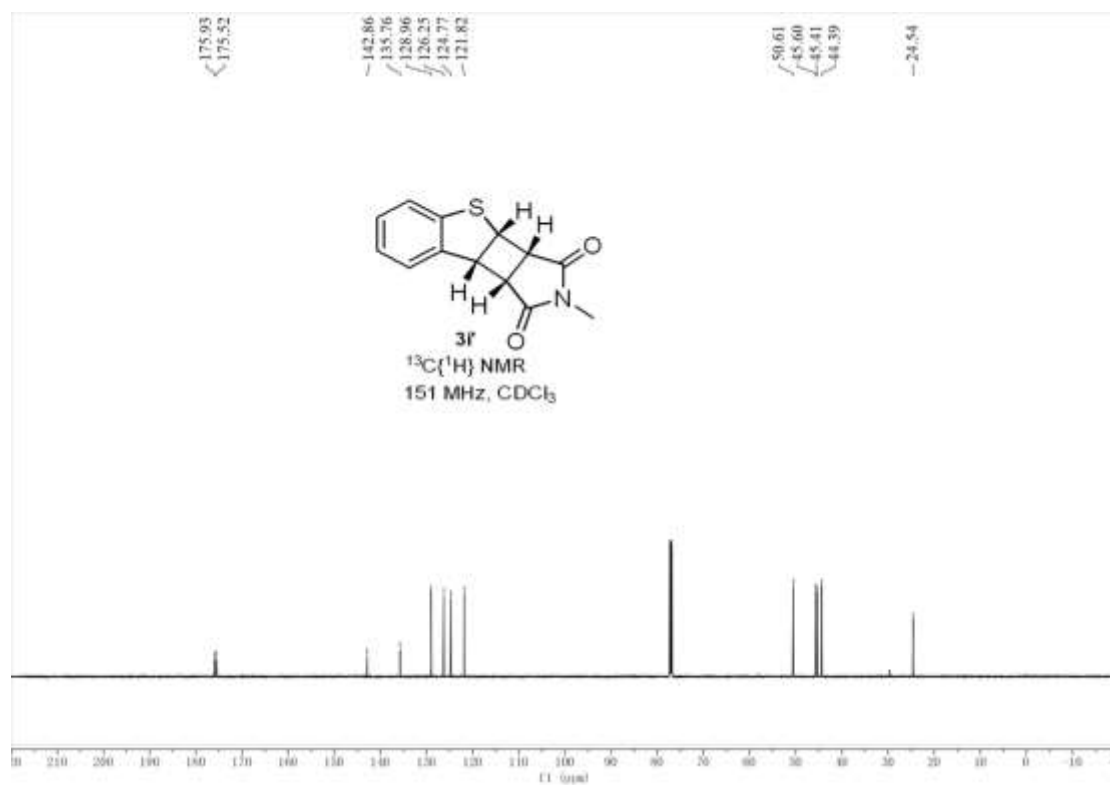

**<sup>1</sup>H NMR Spectrum of 3j**

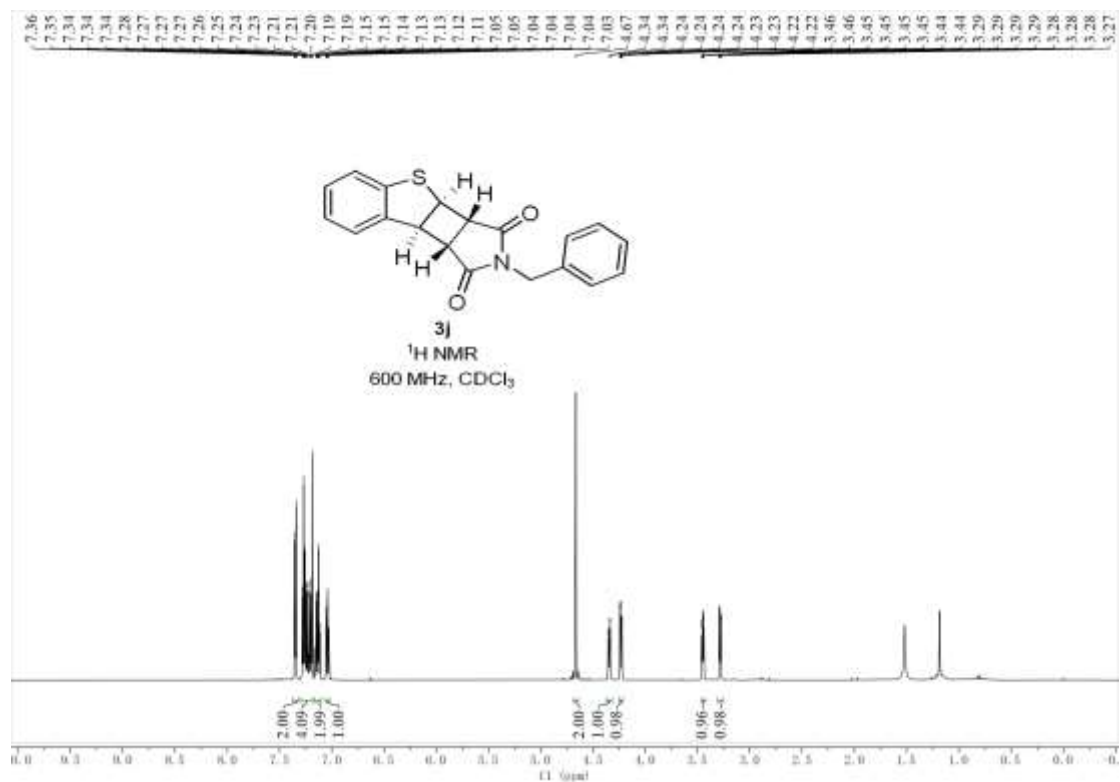

<sup>13</sup>C{<sup>1</sup>H} NMR Spectrum of 3j

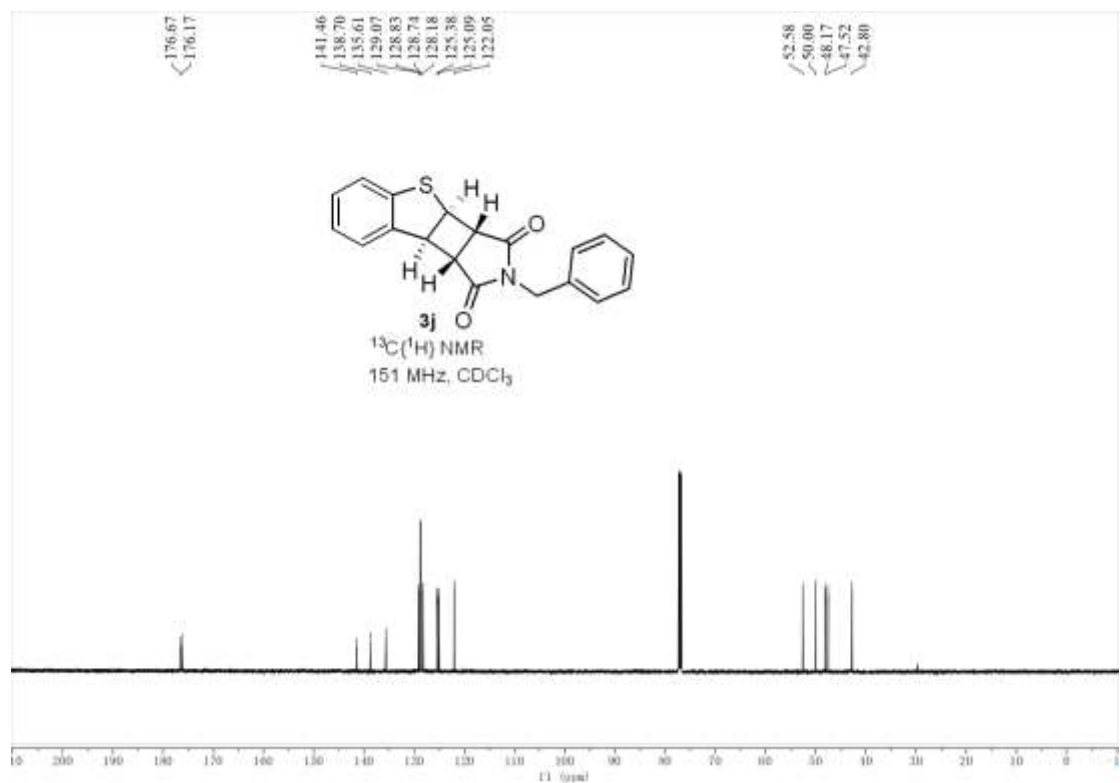

<sup>1</sup>H NMR Spectrum of 3j'

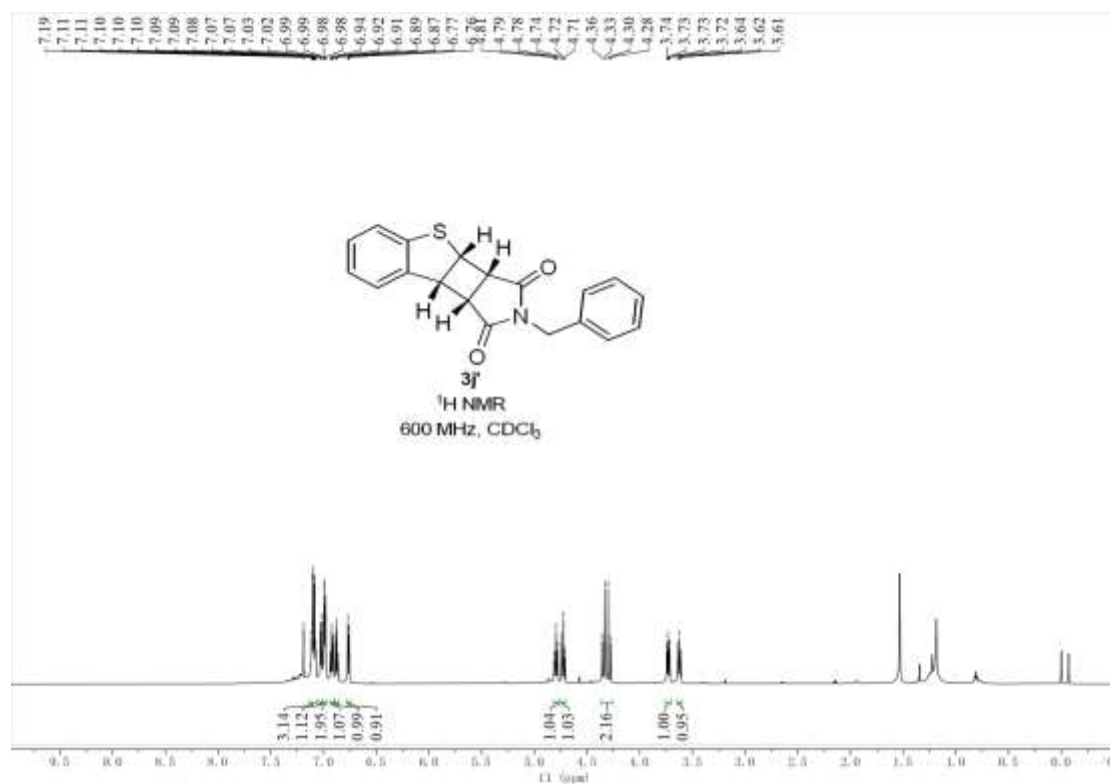

**<sup>13</sup>C{<sup>1</sup>H} NMR Spectrum of 3j'**

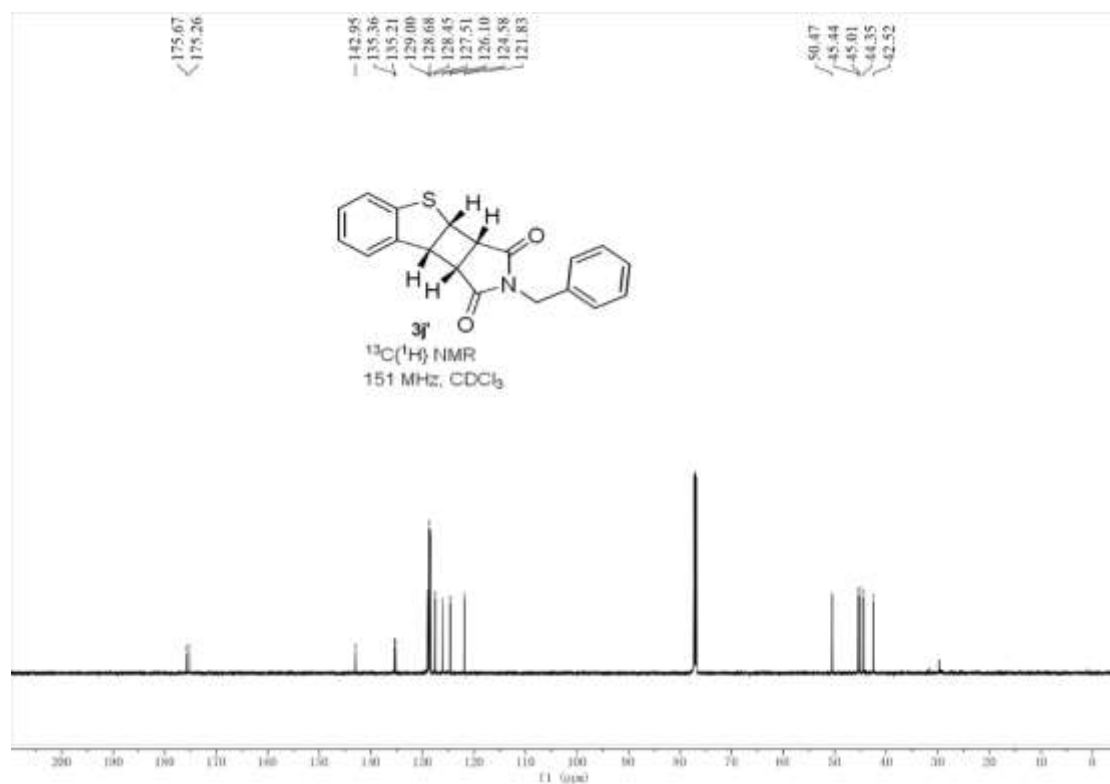

**<sup>1</sup>H NMR Spectrum of 3k**

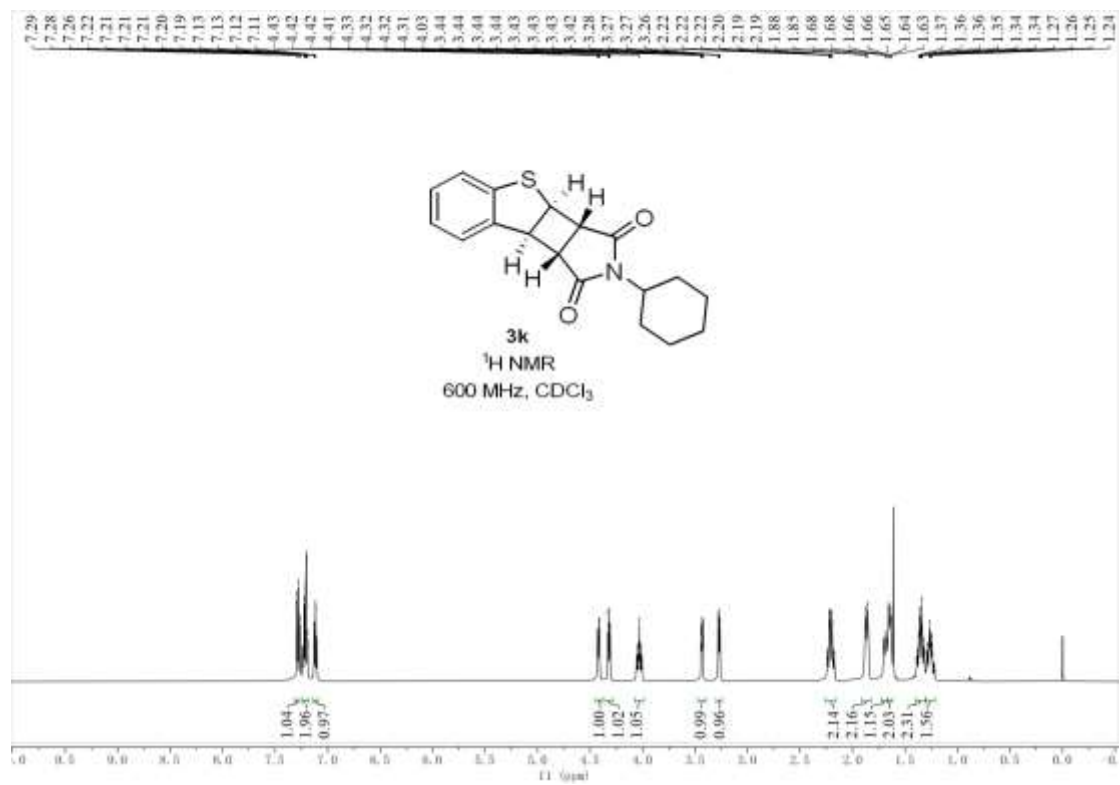

**<sup>13</sup>C{<sup>1</sup>H} NMR Spectrum of 3k**

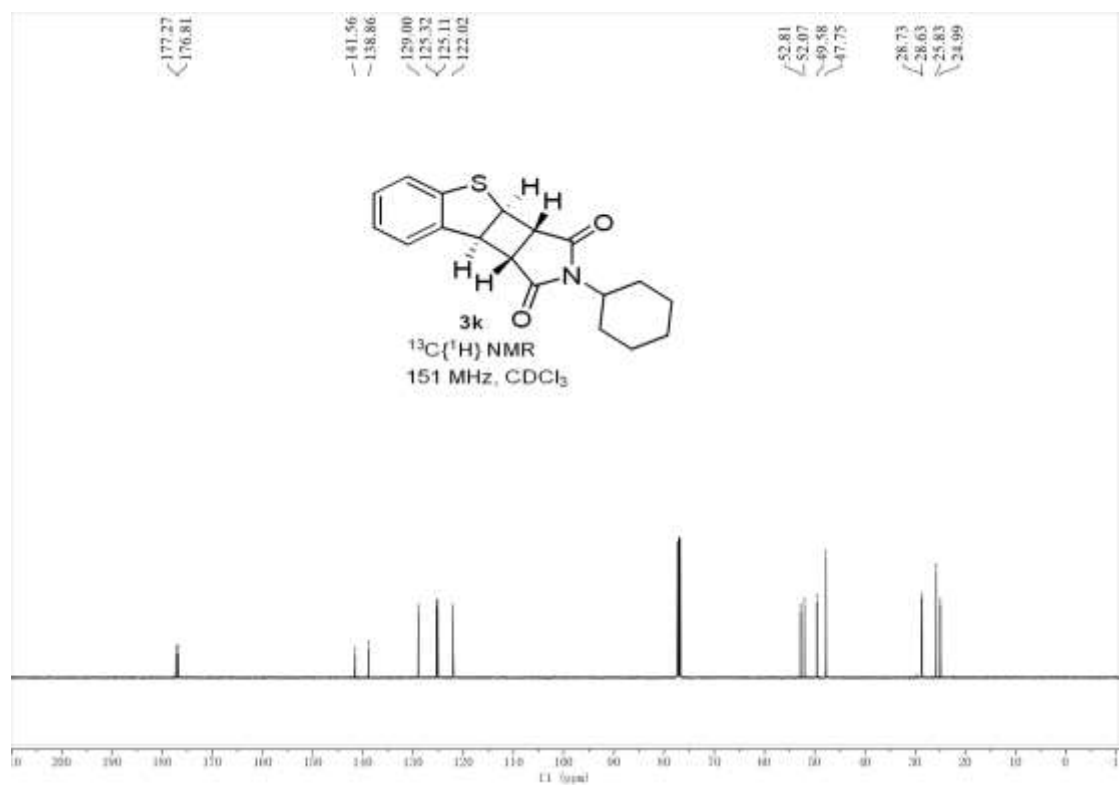

**<sup>1</sup>H NMR Spectrum of 3k'**

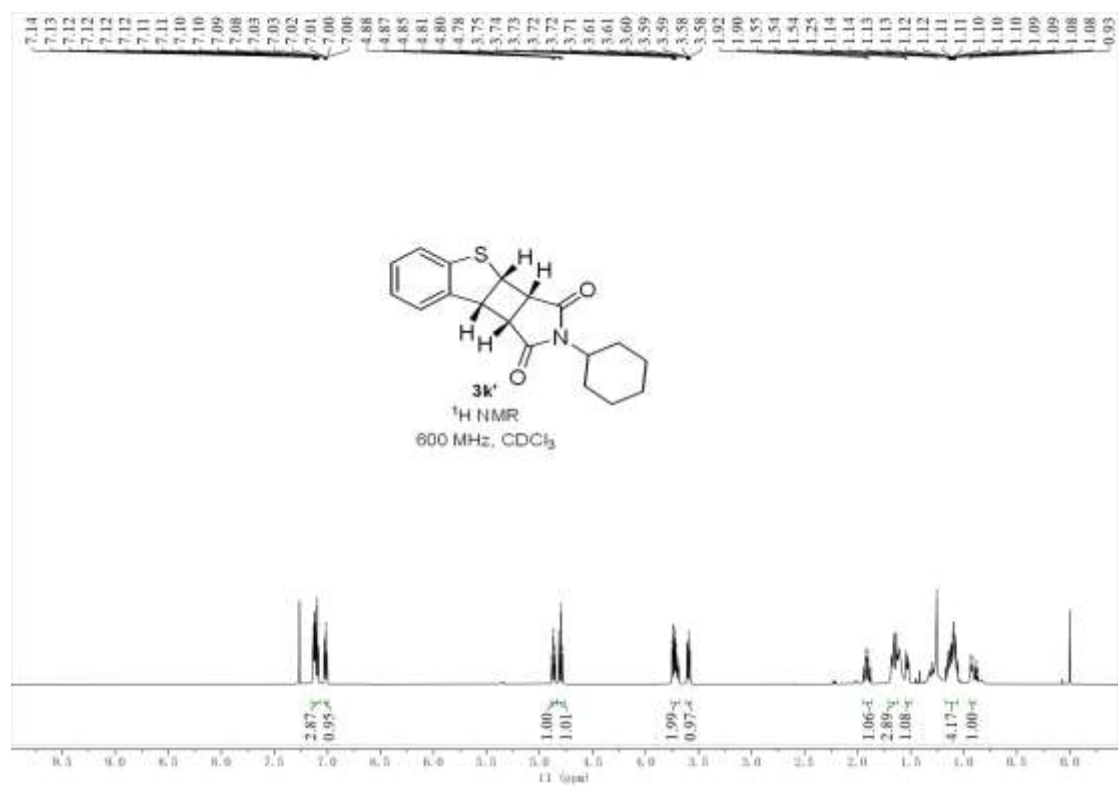

**<sup>13</sup>C{<sup>1</sup>H} NMR Spectrum of 3k'**

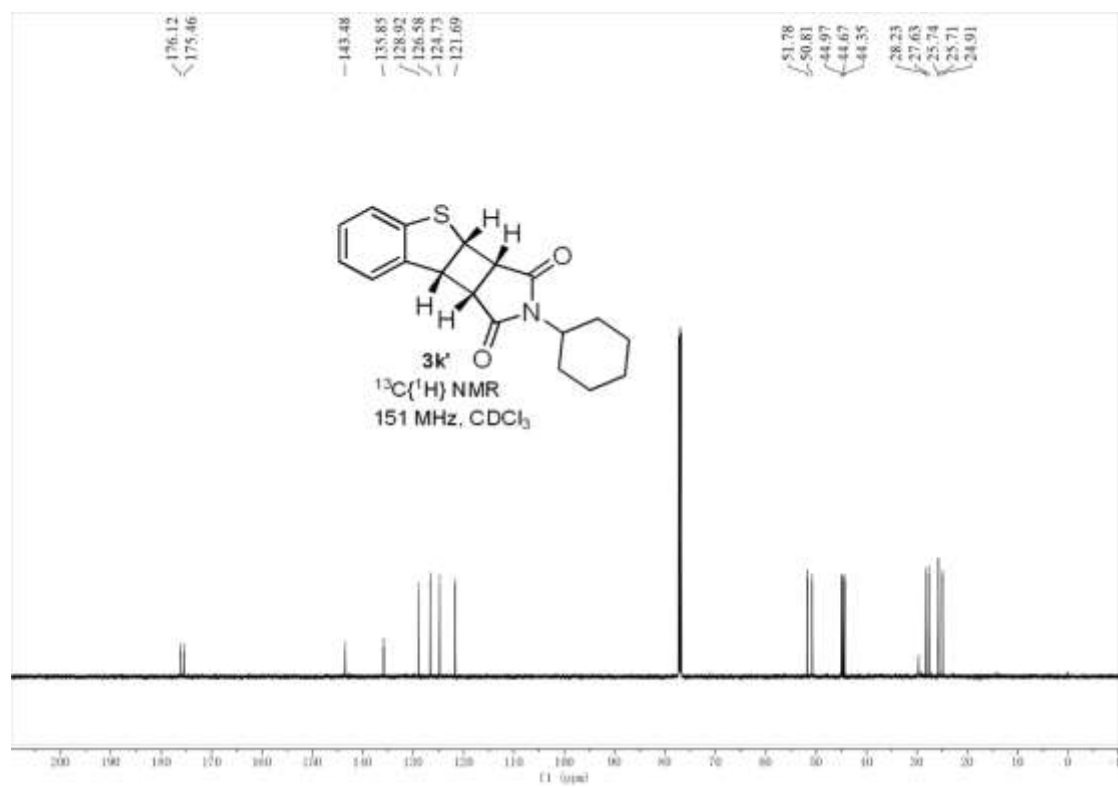

**<sup>1</sup>H NMR Spectrum of 3l**

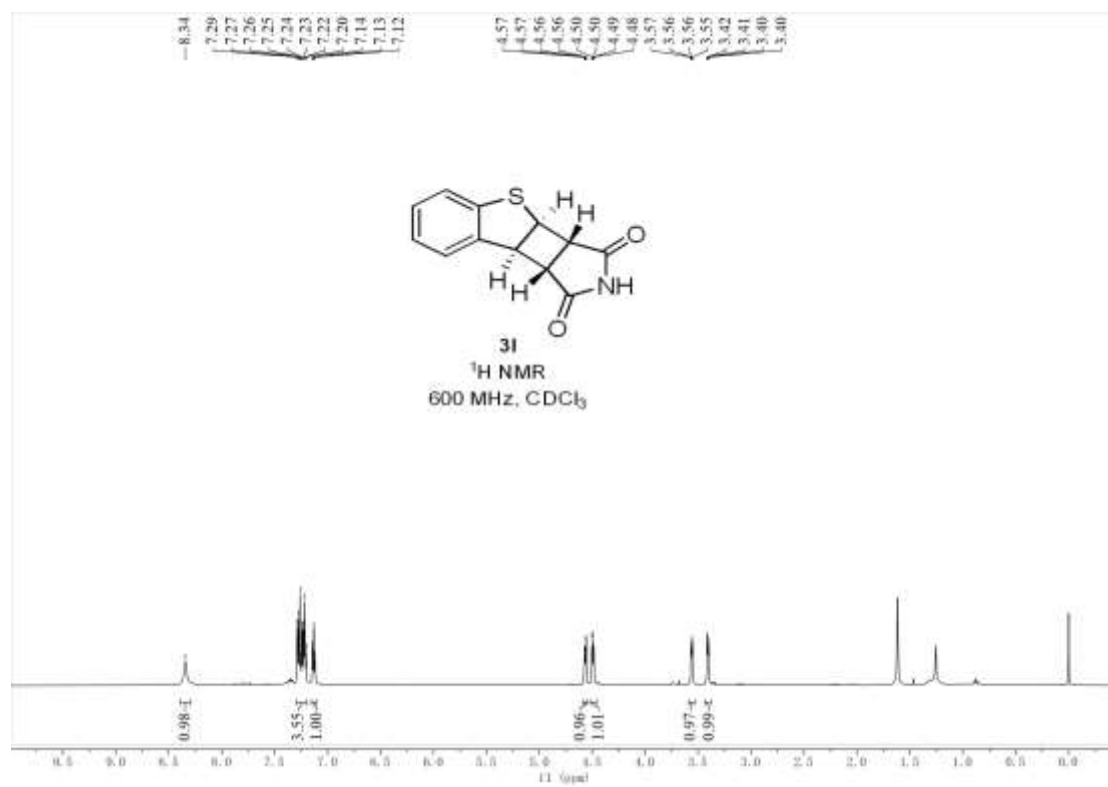

**<sup>13</sup>C{<sup>1</sup>H} NMR Spectrum of 31**

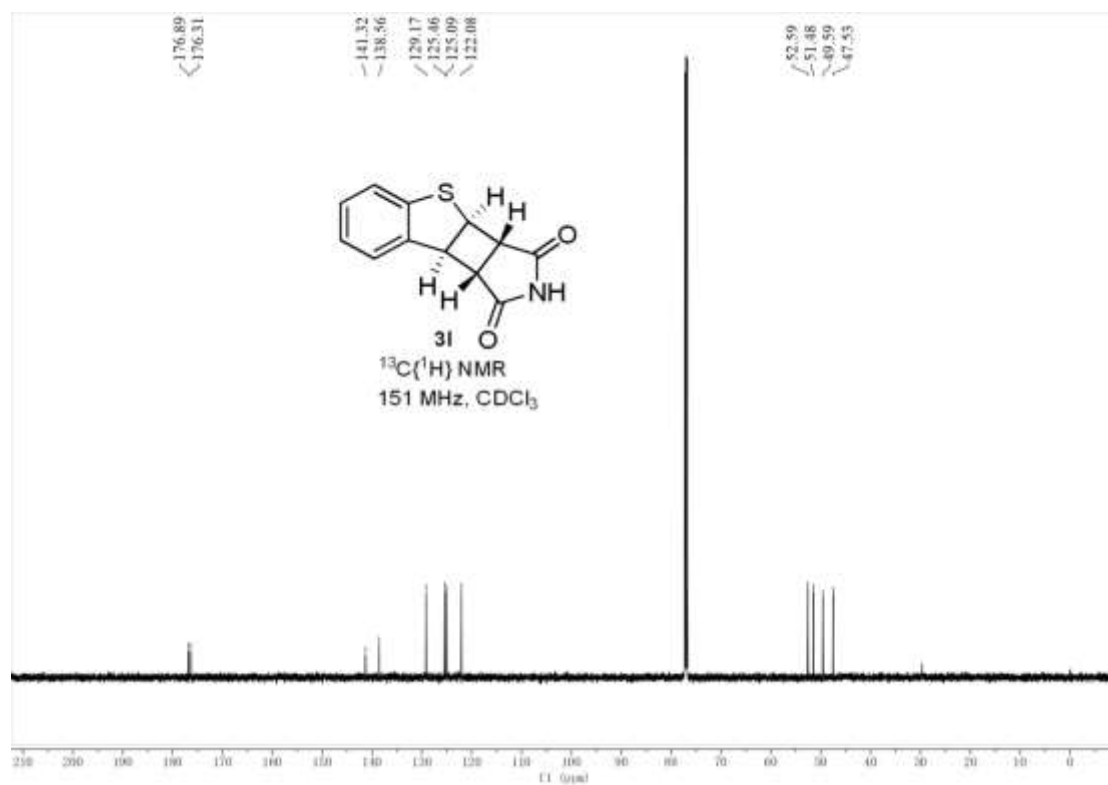

### <sup>1</sup>H NMR Spectrum of 3m

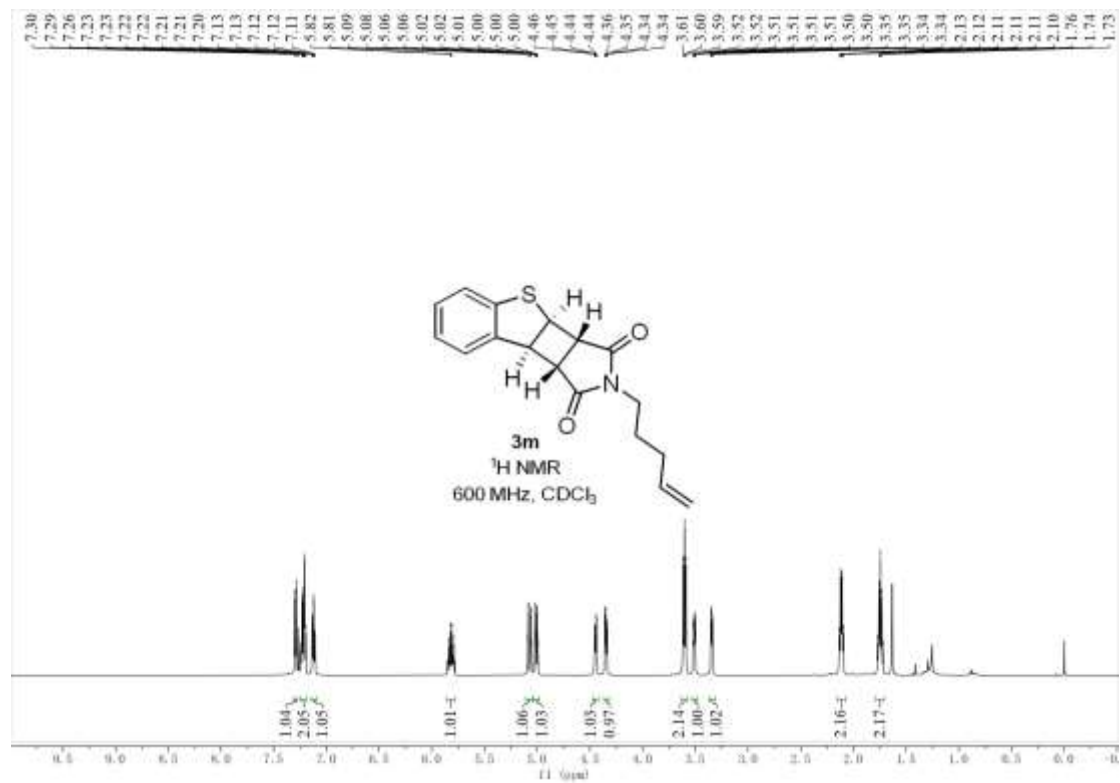

### <sup>13</sup>C{<sup>1</sup>H} NMR Spectrum of 3m

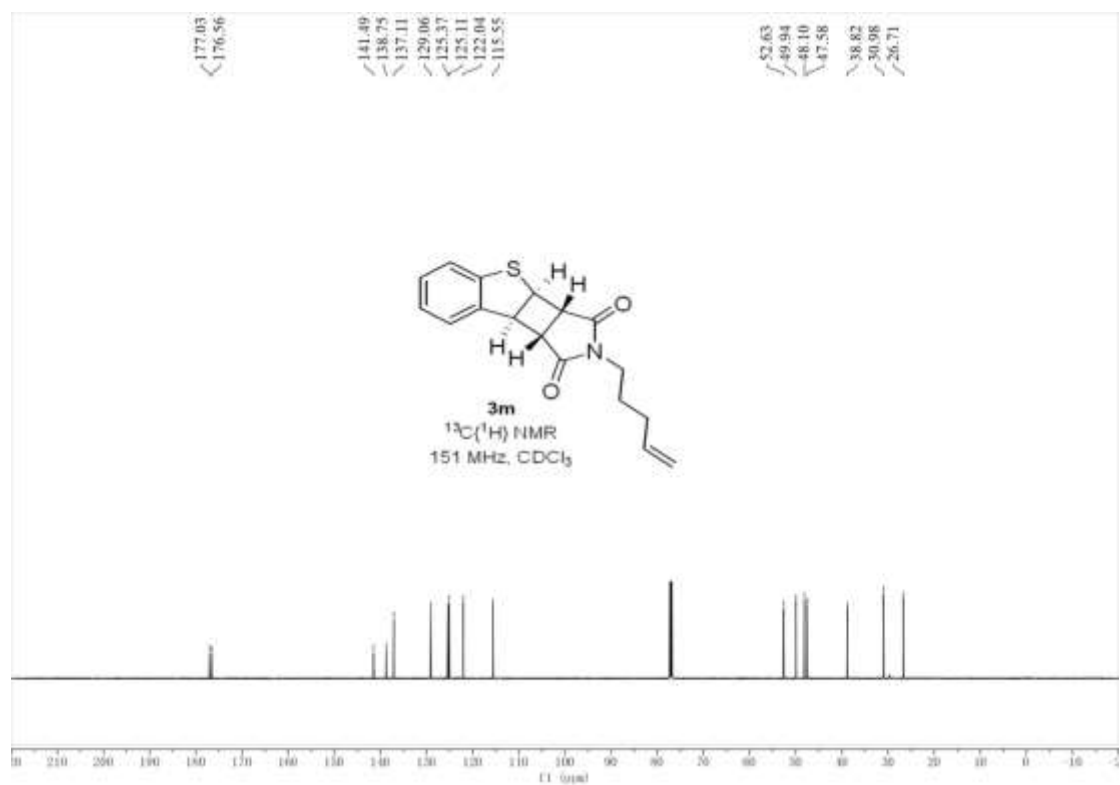

### <sup>1</sup>H NMR Spectrum of 3m'

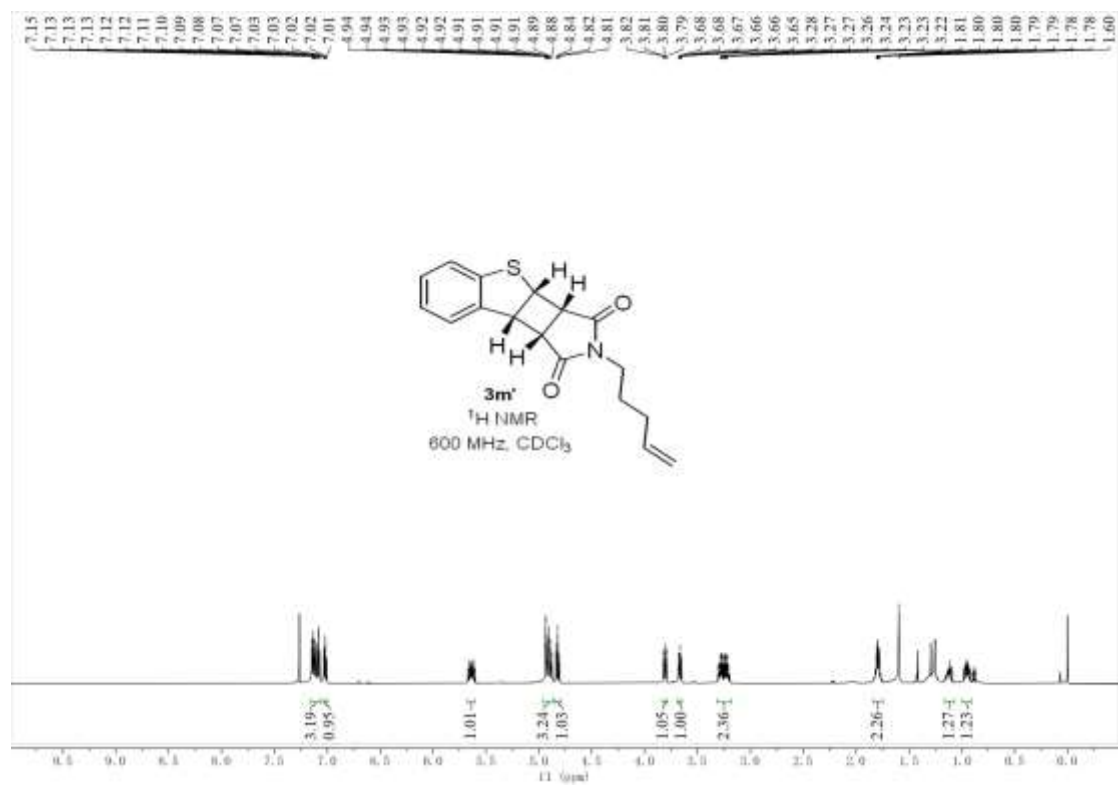

### <sup>13</sup>C{<sup>1</sup>H} NMR Spectrum of 3m'

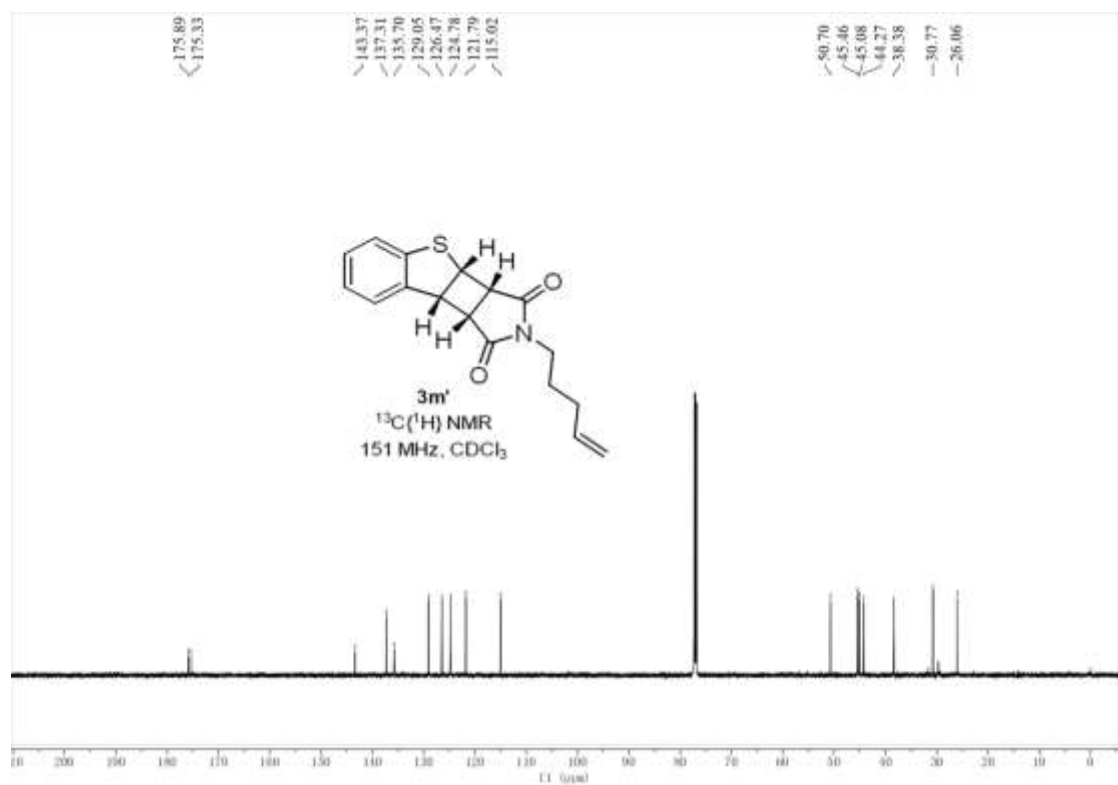



### <sup>1</sup>H NMR Spectrum of 3n

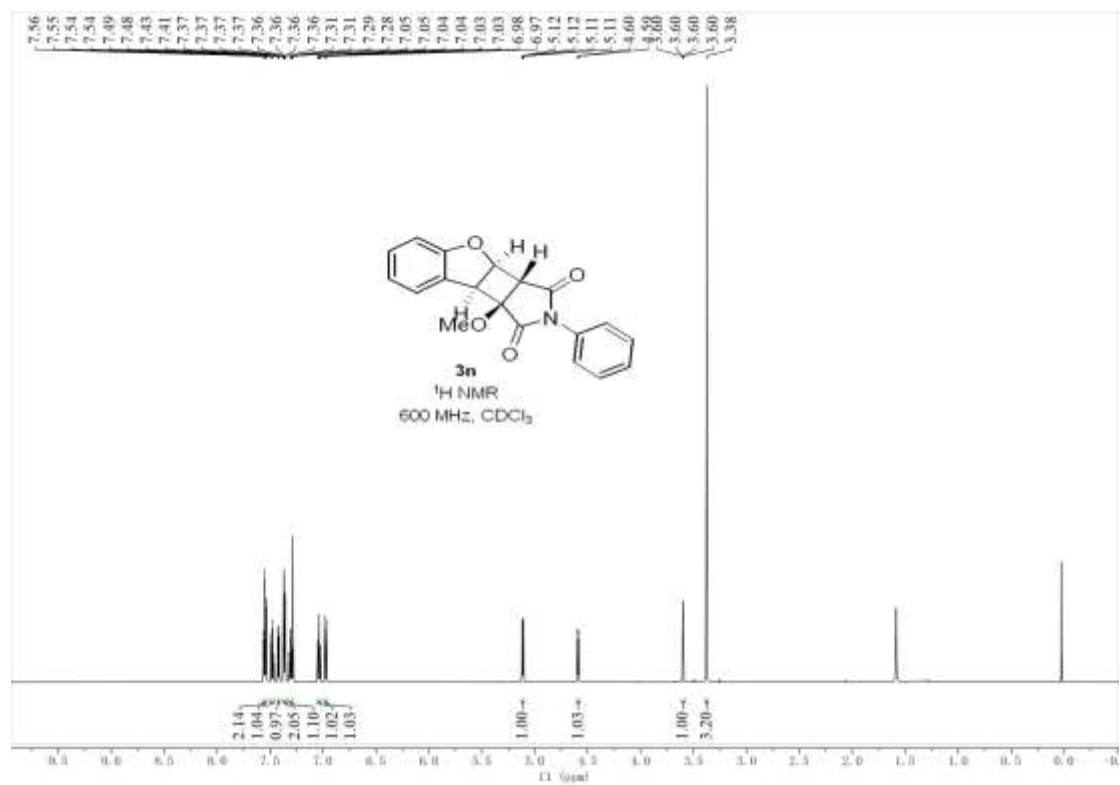

### <sup>13</sup>C{<sup>1</sup>H} NMR Spectrum of 3n

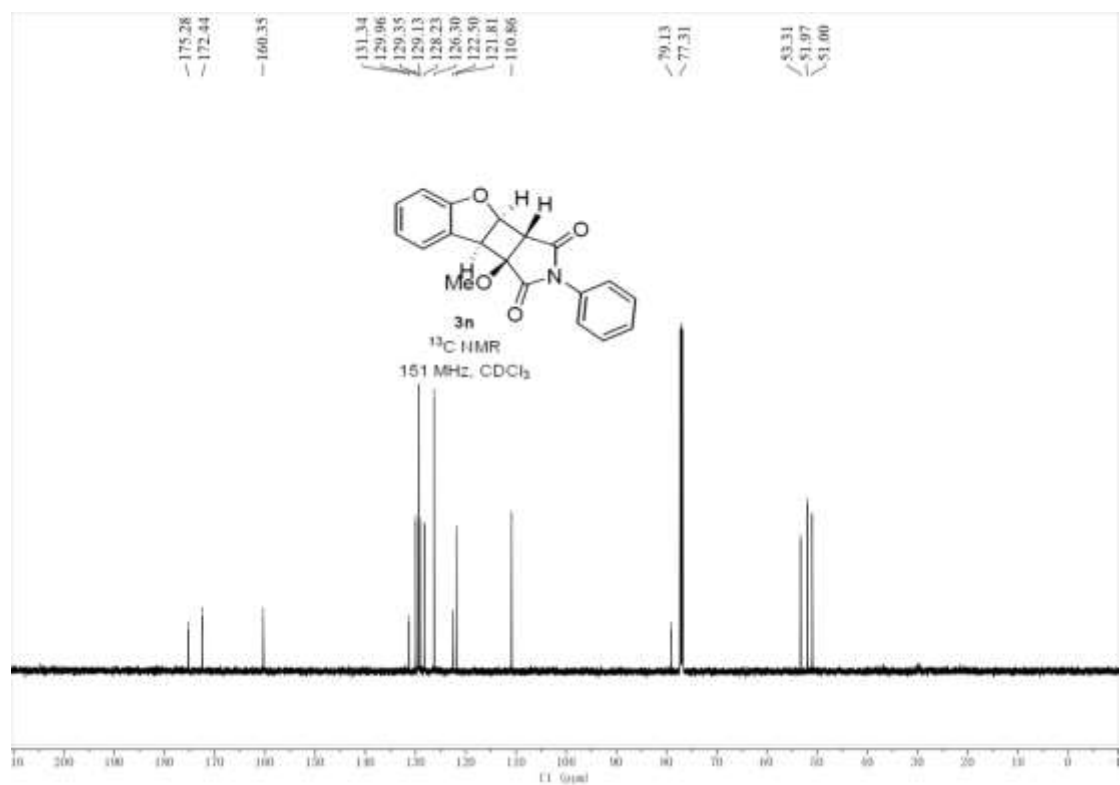

### COSY (400 MHz, CDCl<sub>3</sub>) of 3n

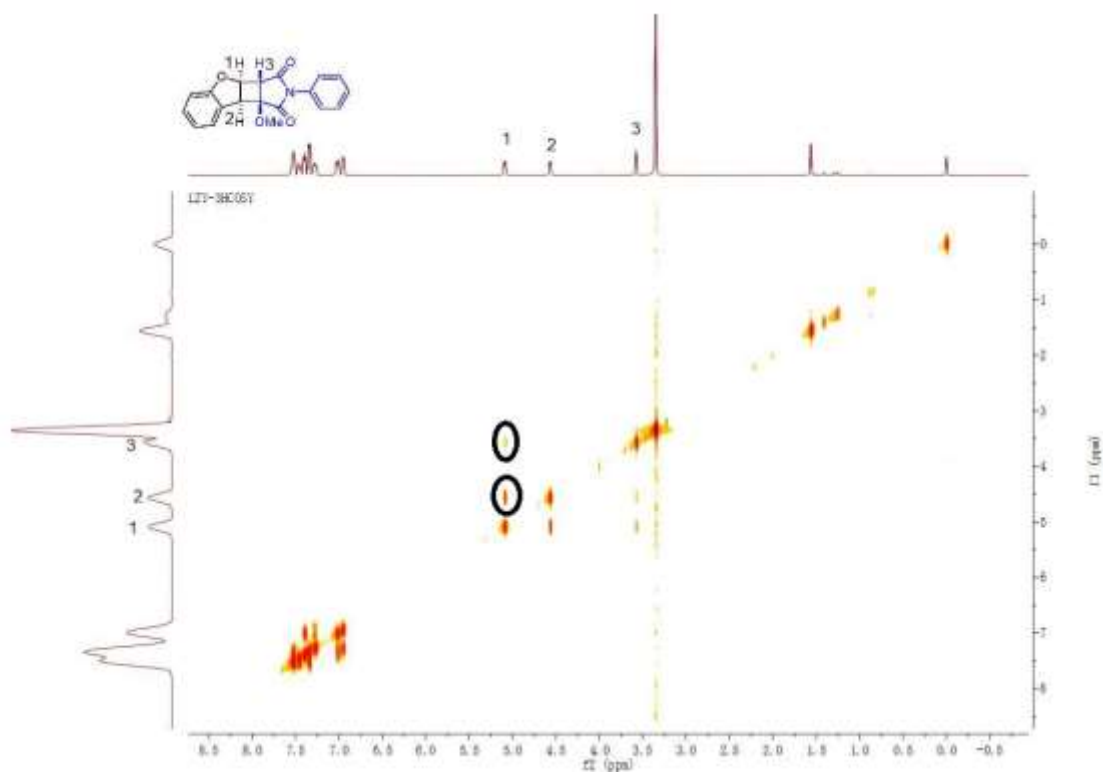

NOESY (400 MHZ,  $\text{CDCl}_3$ ) of 3n

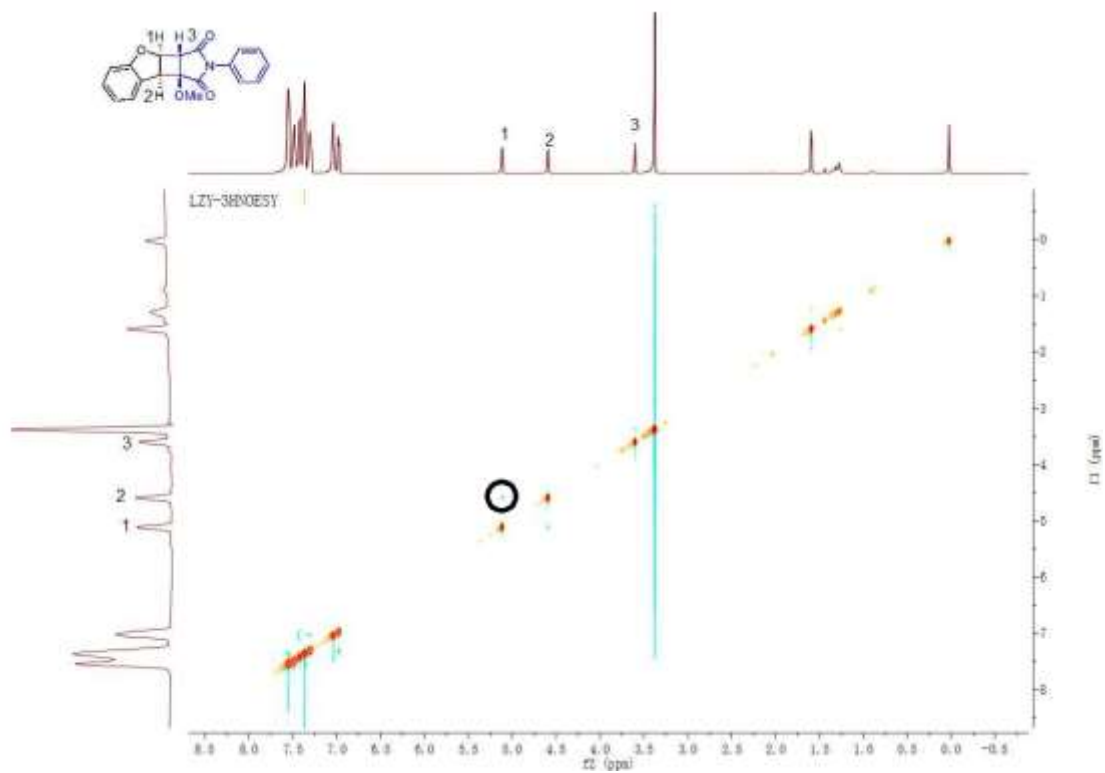

### <sup>1</sup>H NMR Spectrum of 3o

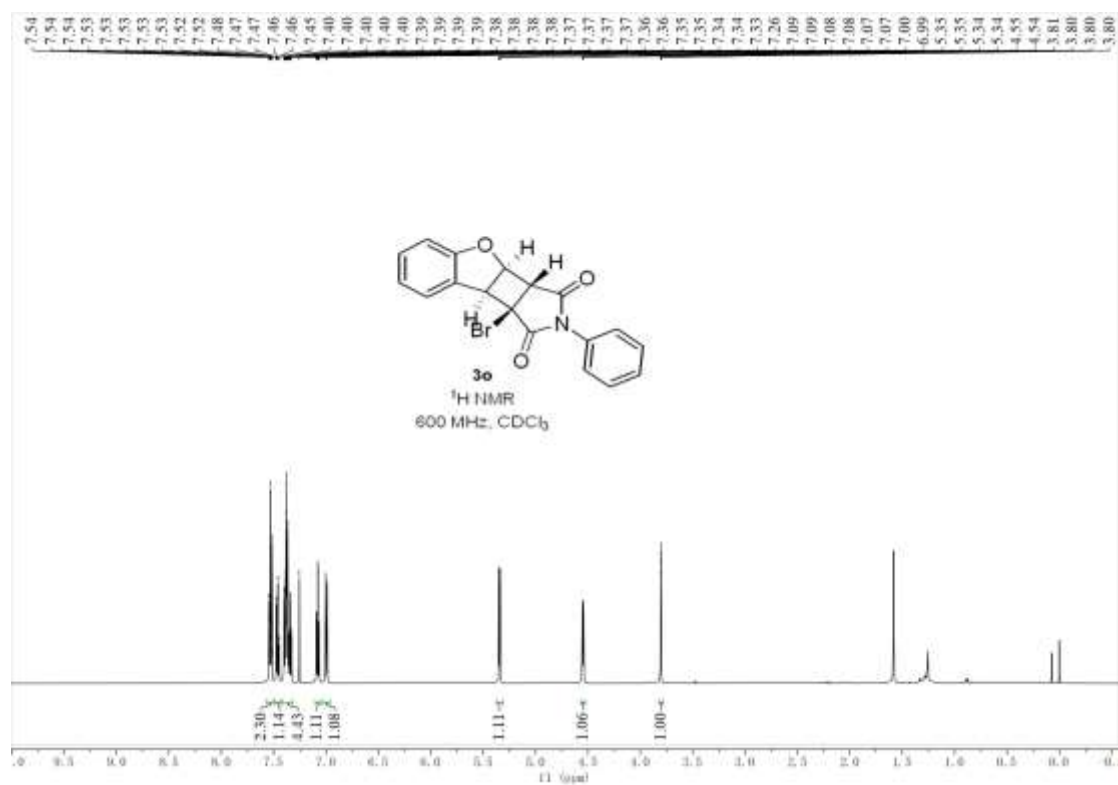

### <sup>13</sup>C{<sup>1</sup>H} NMR Spectrum of 3o

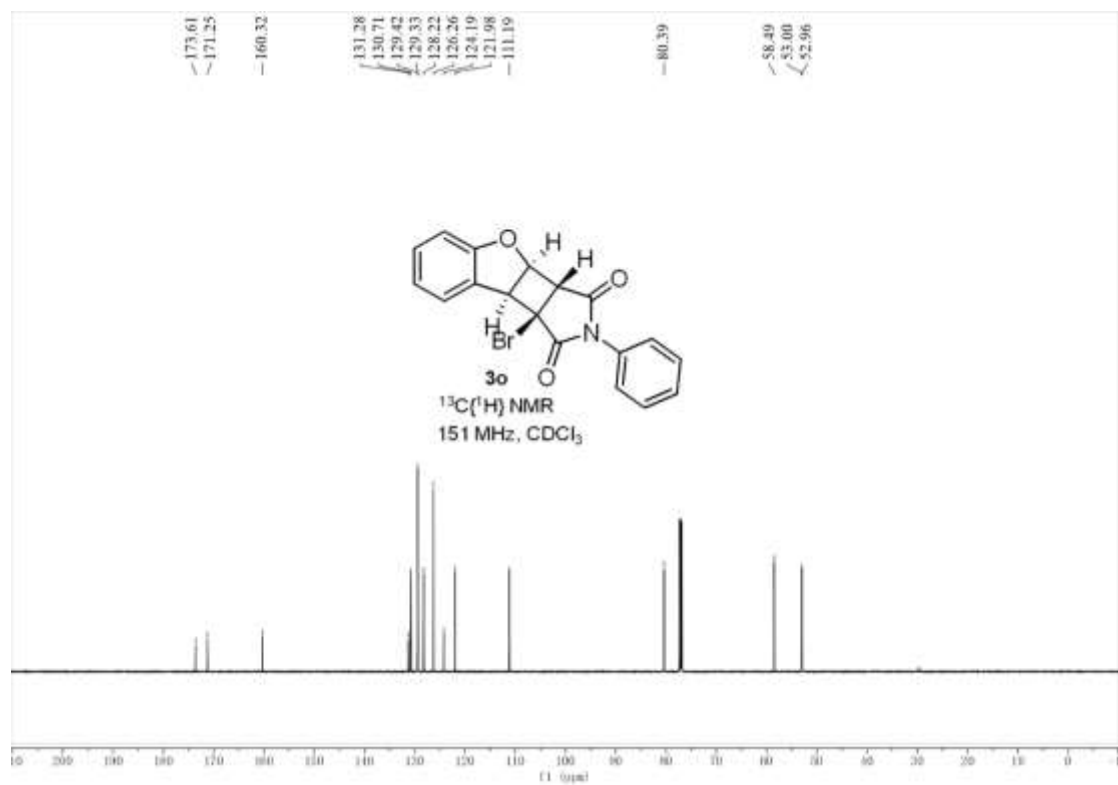

### <sup>1</sup>H NMR Spectrum of 3aa

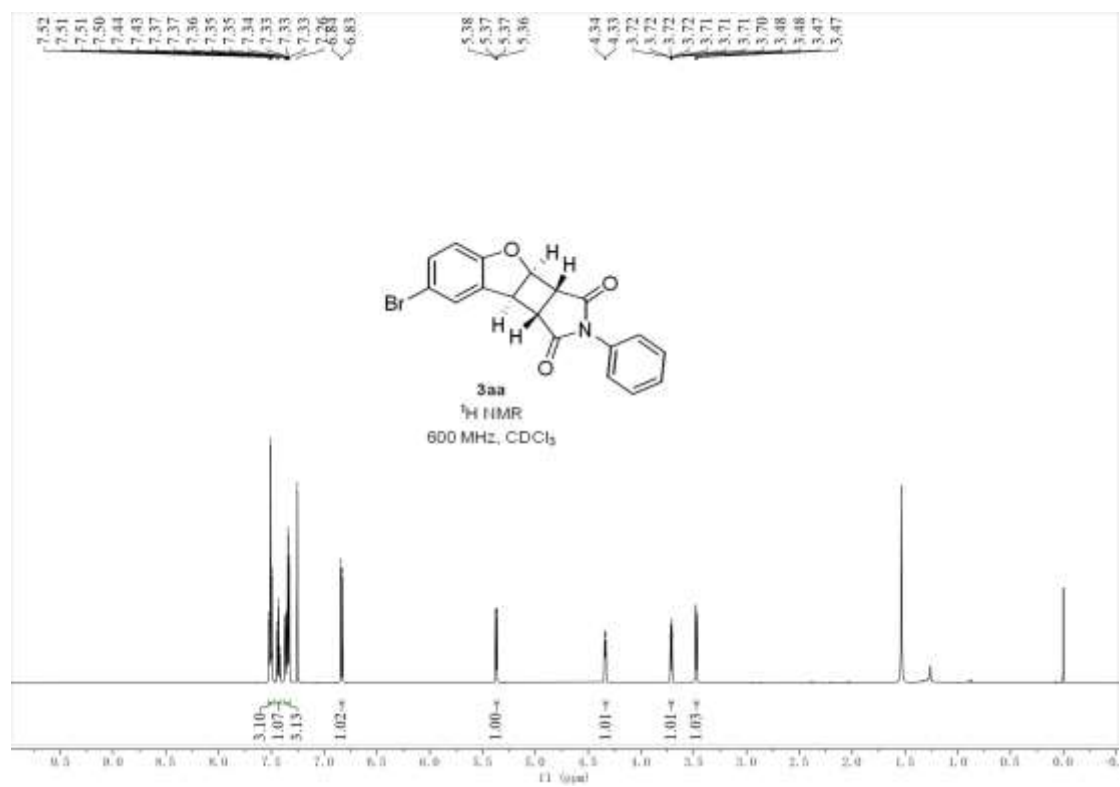

**<sup>13</sup>C{<sup>1</sup>H} NMR Spectrum of 3aa**

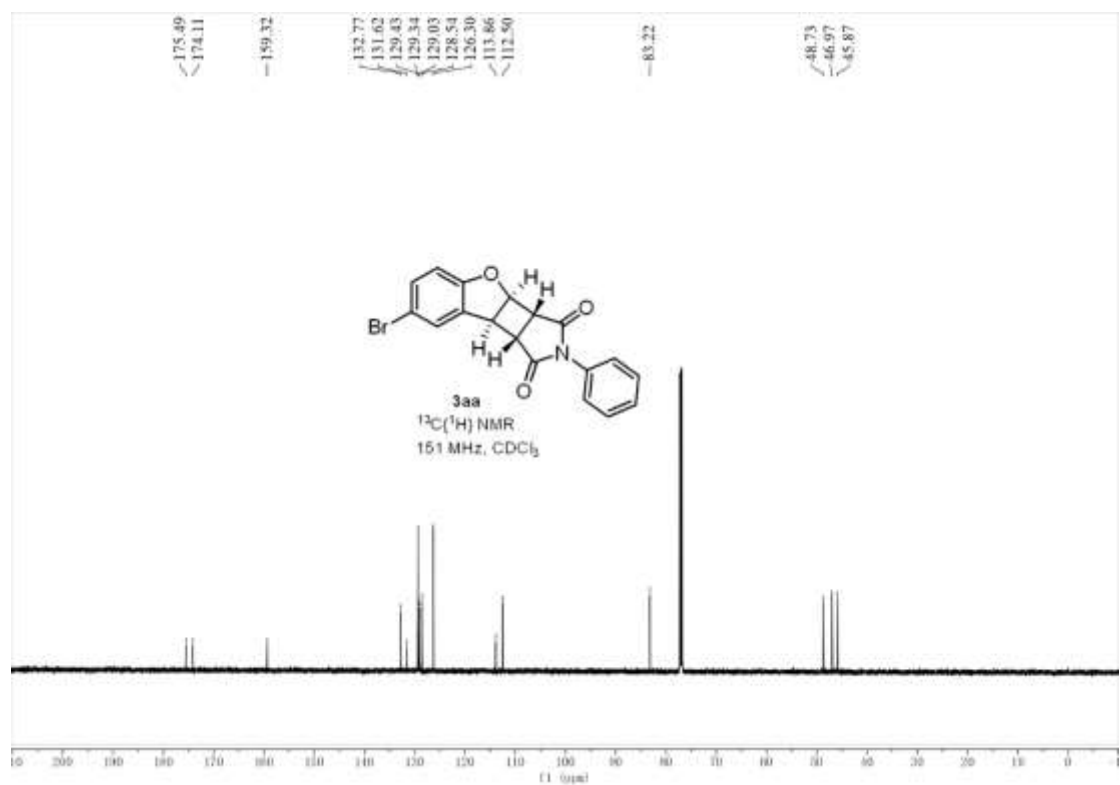

**<sup>1</sup>H NMR Spectrum of 3aa'**

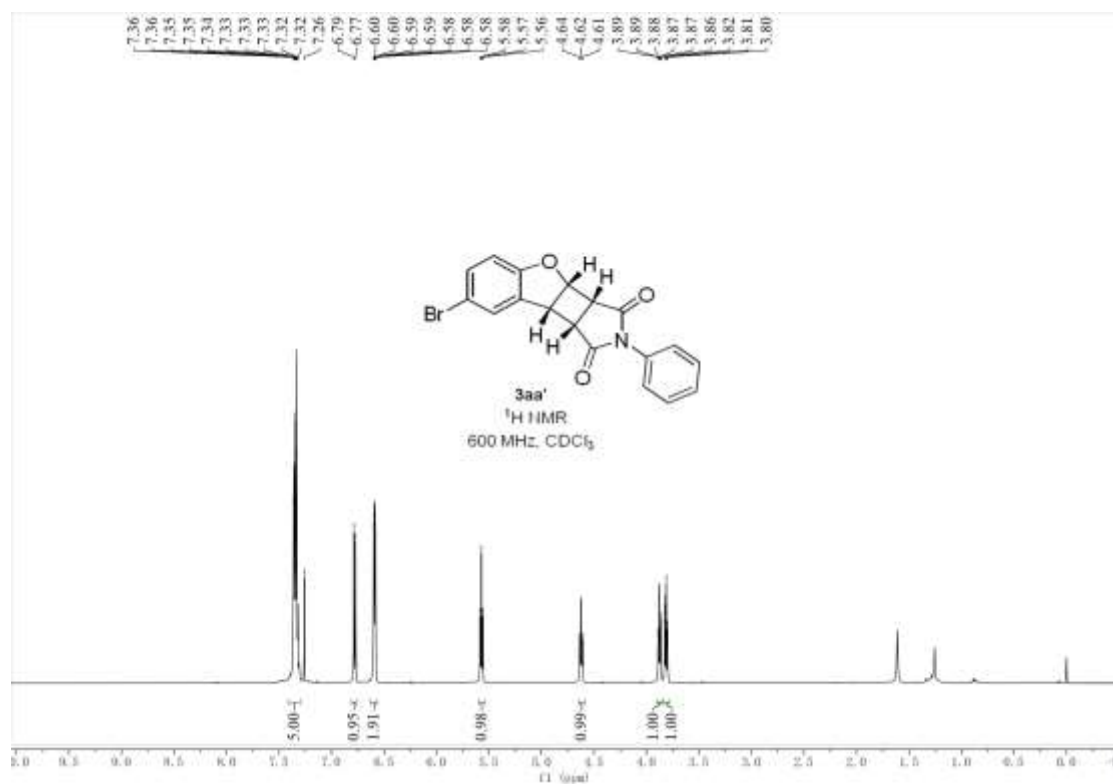

**<sup>13</sup>C{<sup>1</sup>H} NMR Spectrum of 3aa'**

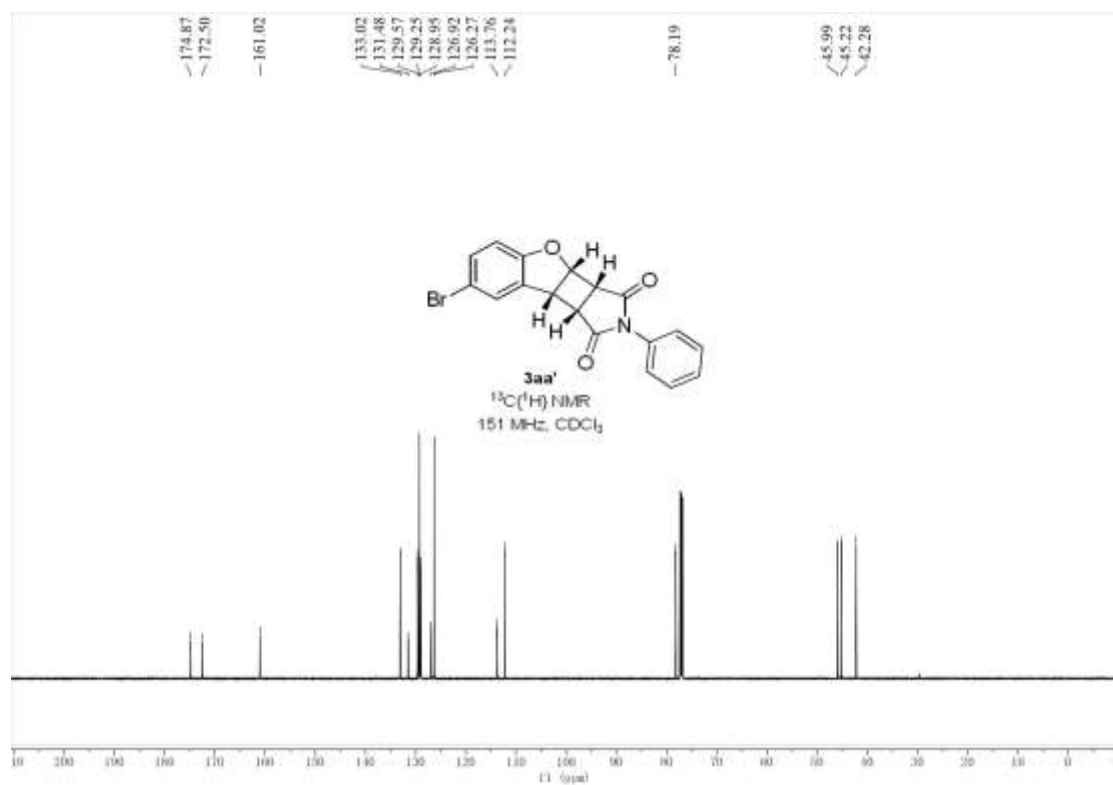

**<sup>1</sup>H NMR Spectrum of 3ab**

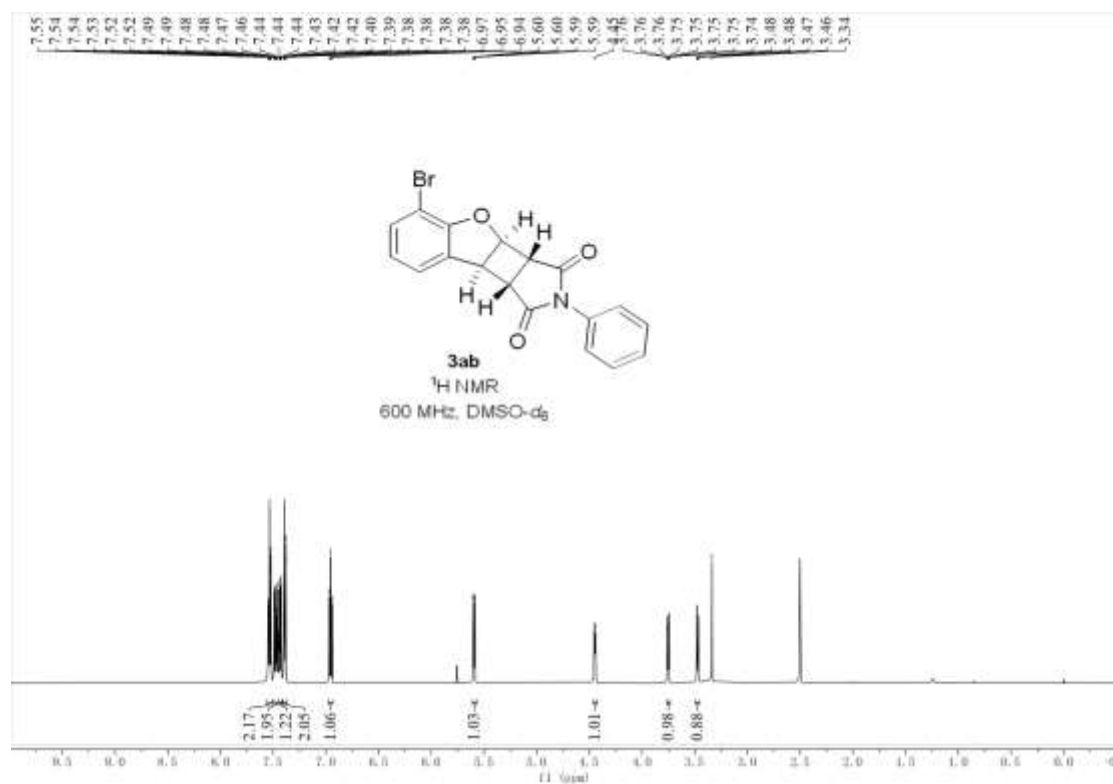

**<sup>13</sup>C{<sup>1</sup>H} NMR Spectrum of 3ab**

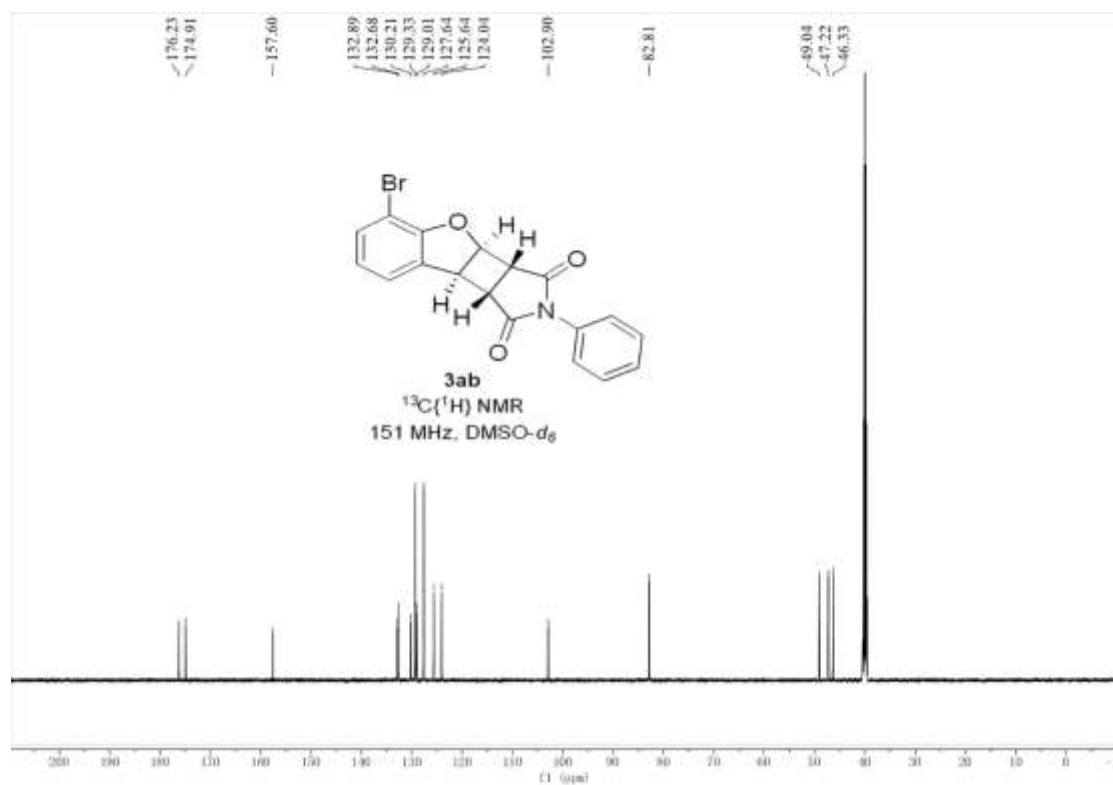

**<sup>1</sup>H NMR Spectrum of 3ab'**

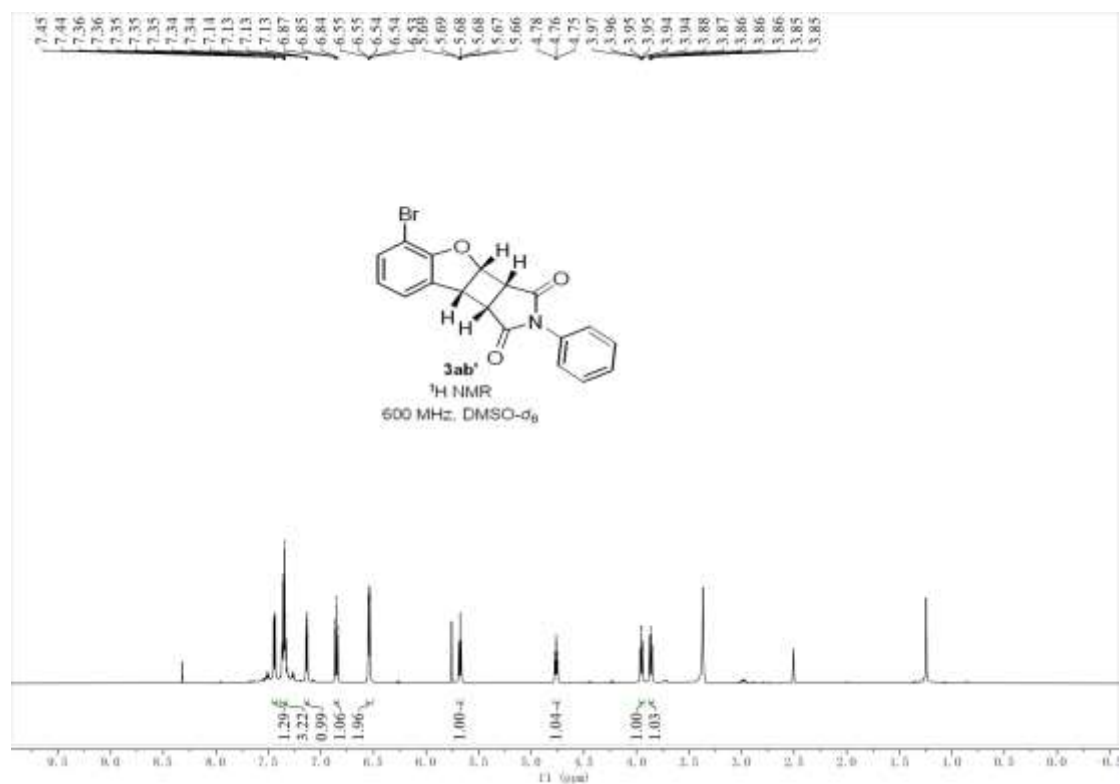

**<sup>13</sup>C{<sup>1</sup>H} NMR Spectrum of 3ab'**

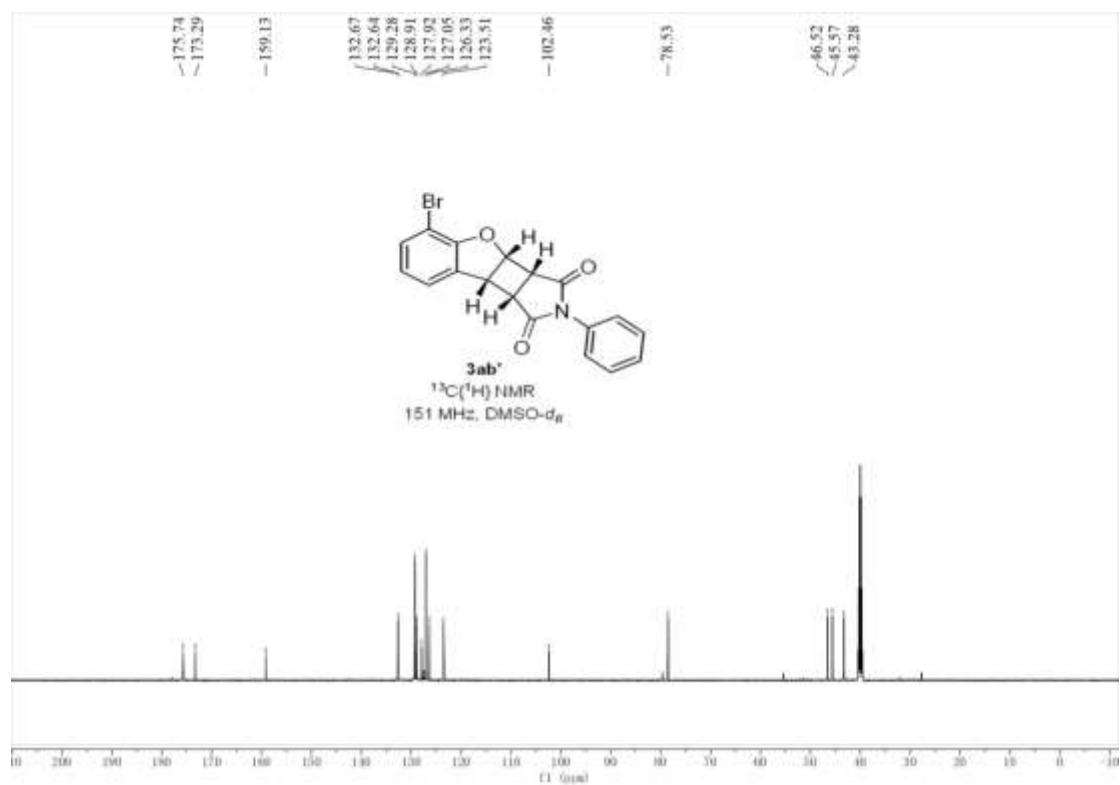

**<sup>1</sup>H NMR Spectrum of 3ac**

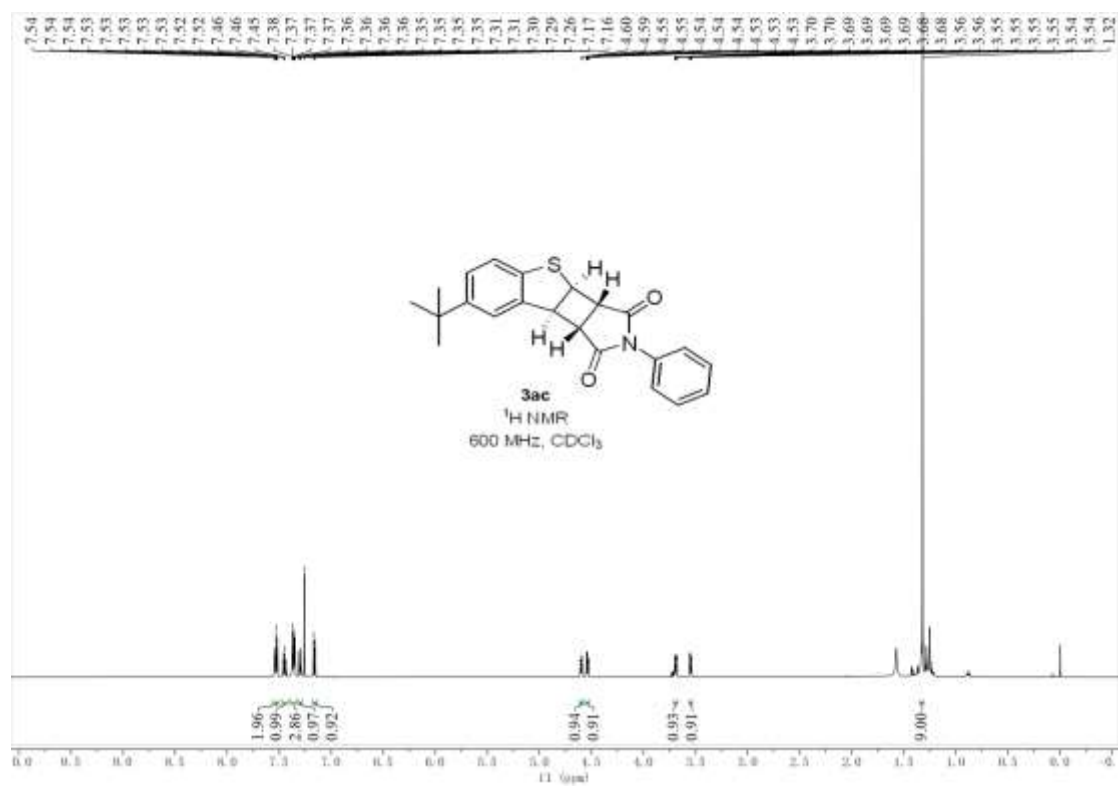

<sup>13</sup>C{<sup>1</sup>H} NMR Spectrum of 3ac

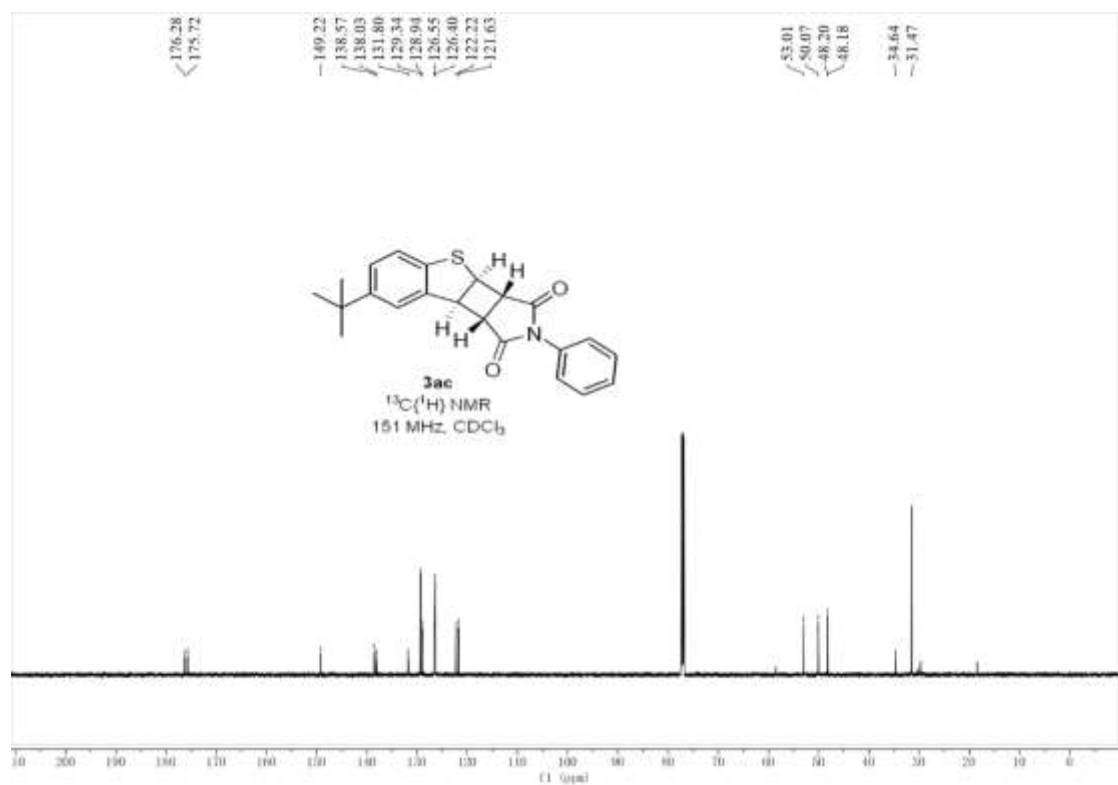

<sup>1</sup>H NMR Spectrum of 3ac'



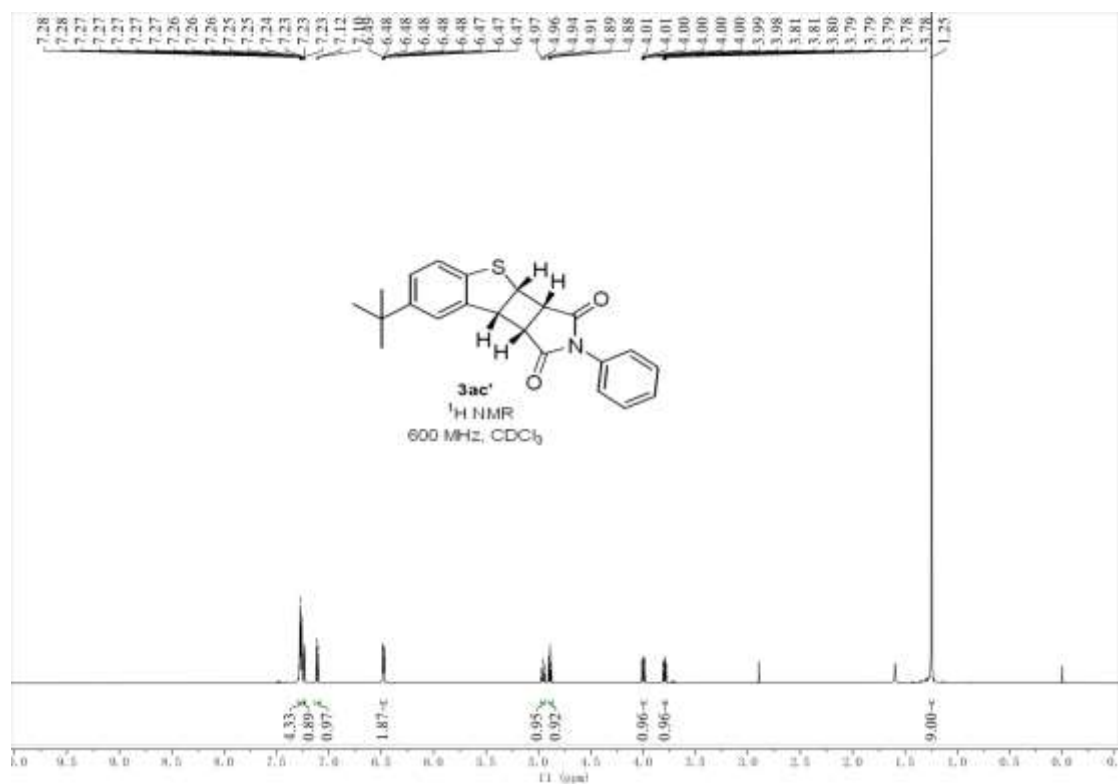

**<sup>13</sup>C{<sup>1</sup>H} NMR Spectrum of 3ac'**

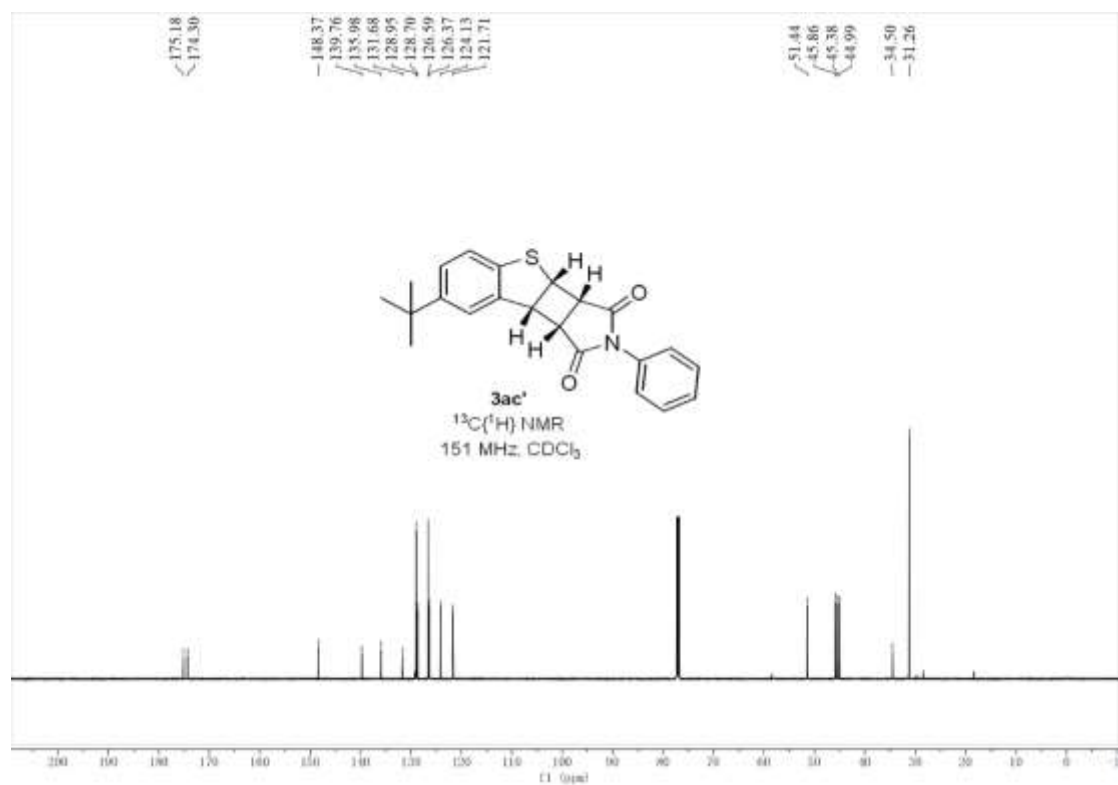

**<sup>1</sup>H NMR Spectrum of 3ad**

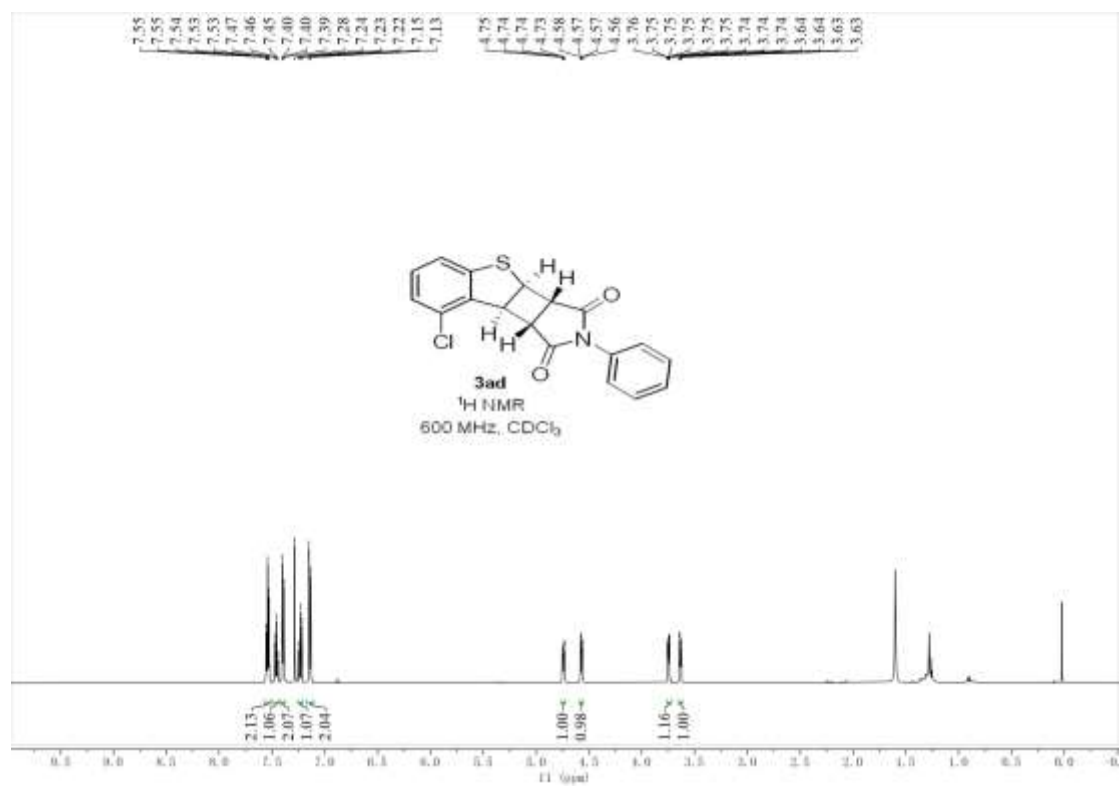

**<sup>13</sup>C{<sup>1</sup>H} NMR Spectrum of 3ad**

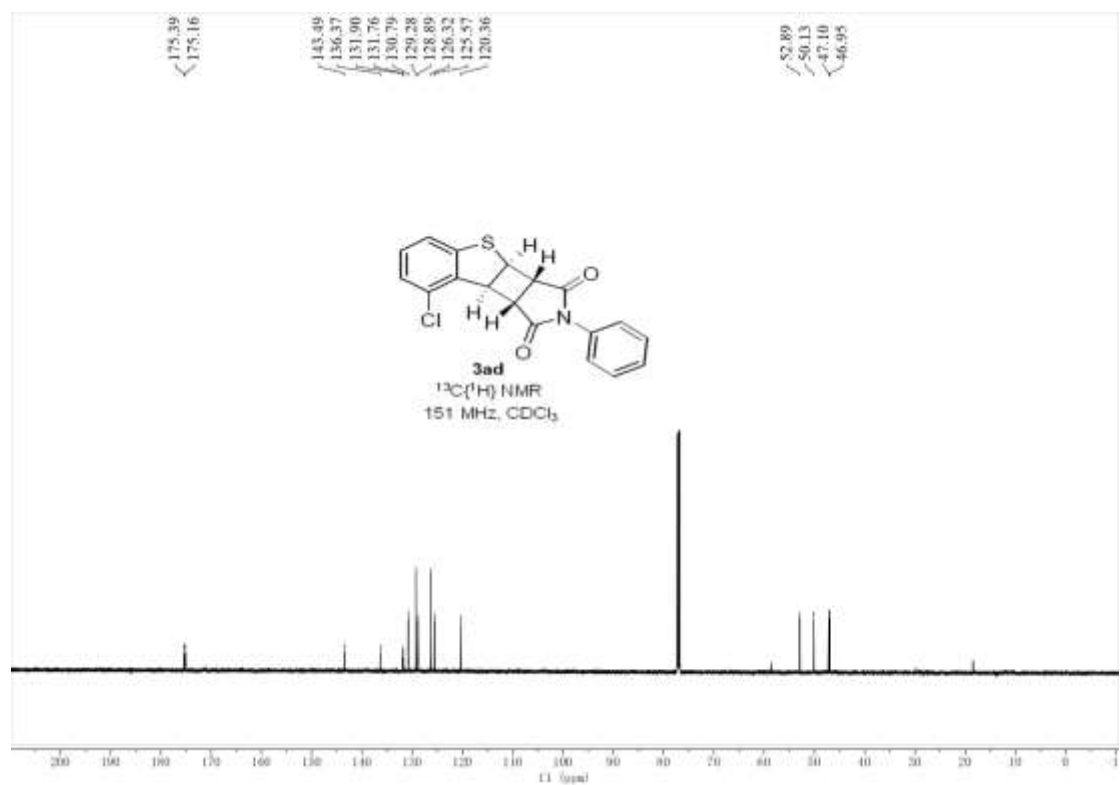

**<sup>1</sup>H NMR Spectrum of 3ad'**

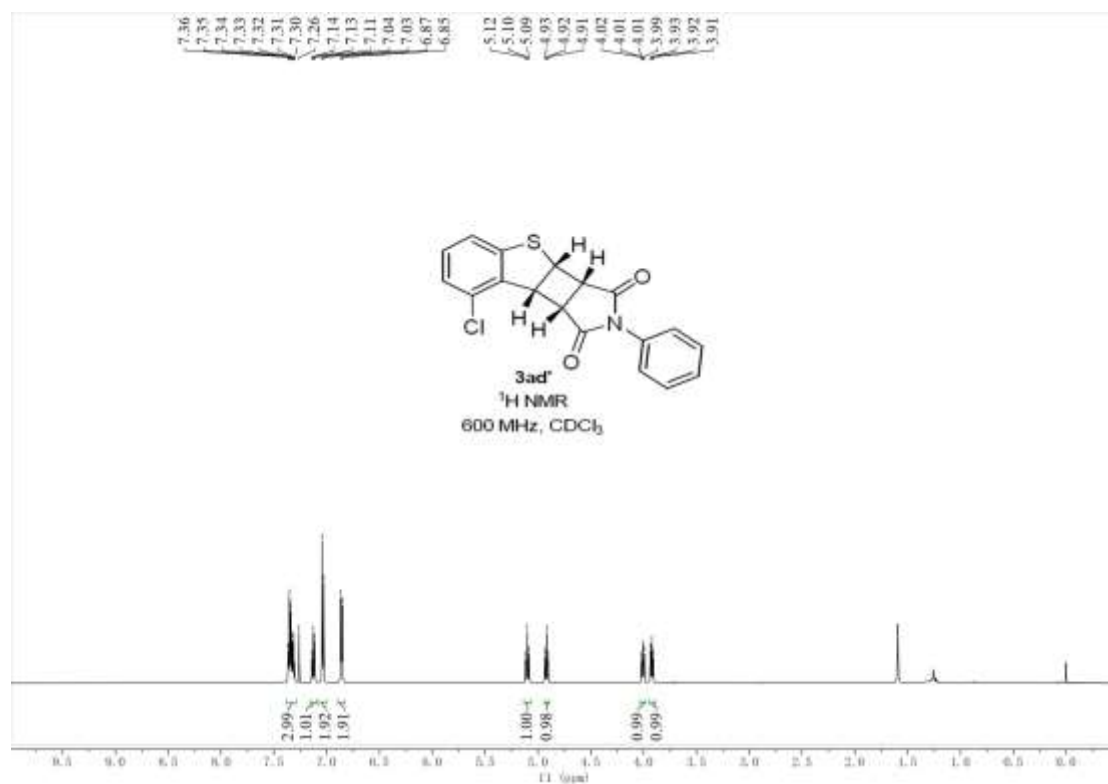

**<sup>13</sup>C{<sup>1</sup>H} NMR Spectrum of 3ad'**

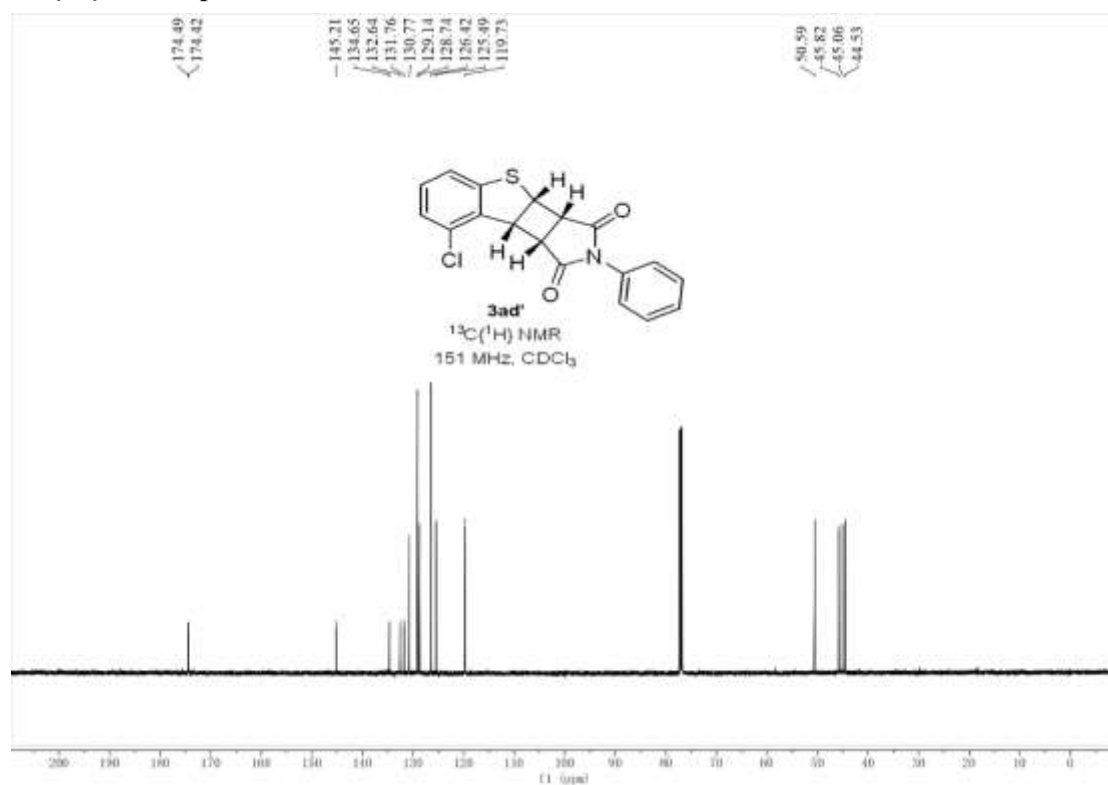

**<sup>1</sup>H NMR Spectrum of 3ae**

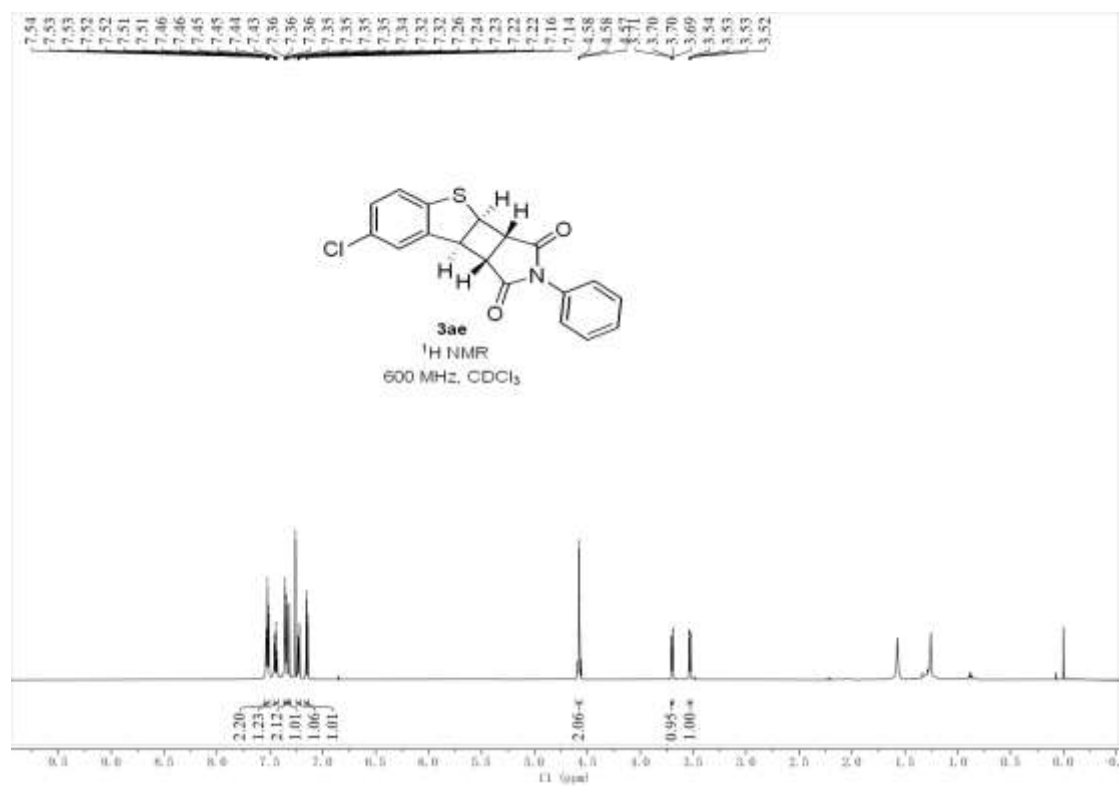

**<sup>13</sup>C{<sup>1</sup>H} NMR Spectrum of 3ae**

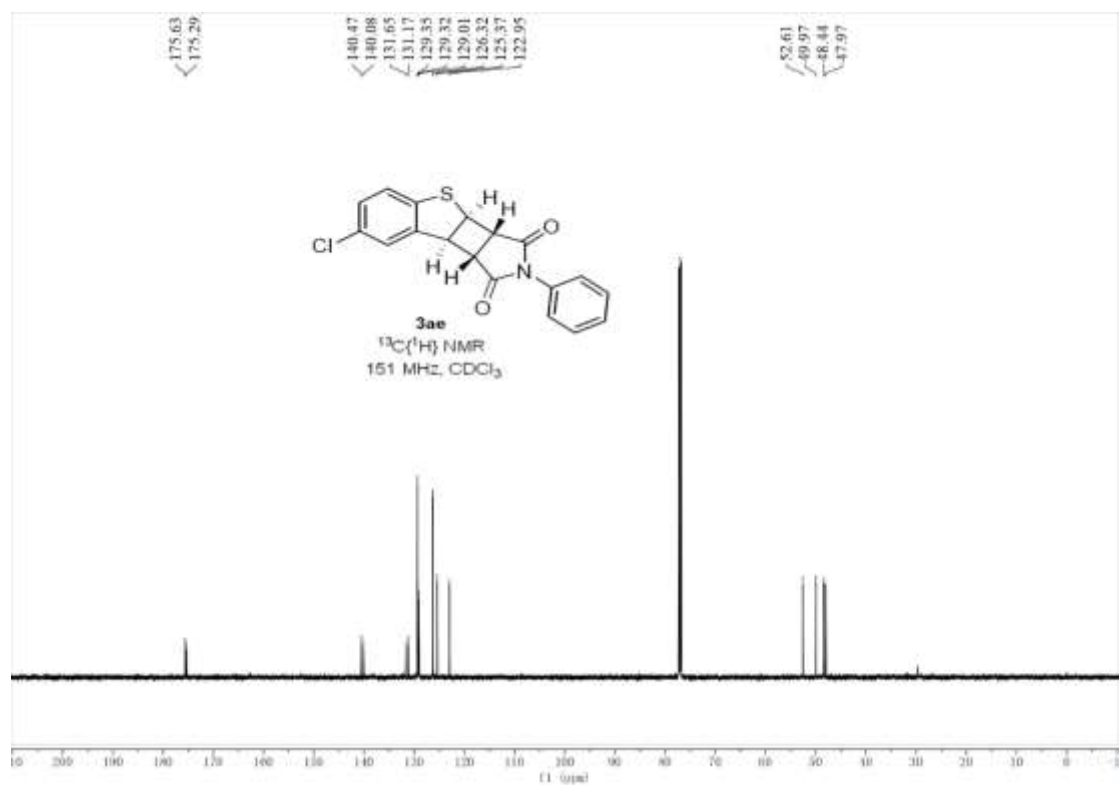

**<sup>1</sup>H NMR Spectrum of 3ae'**

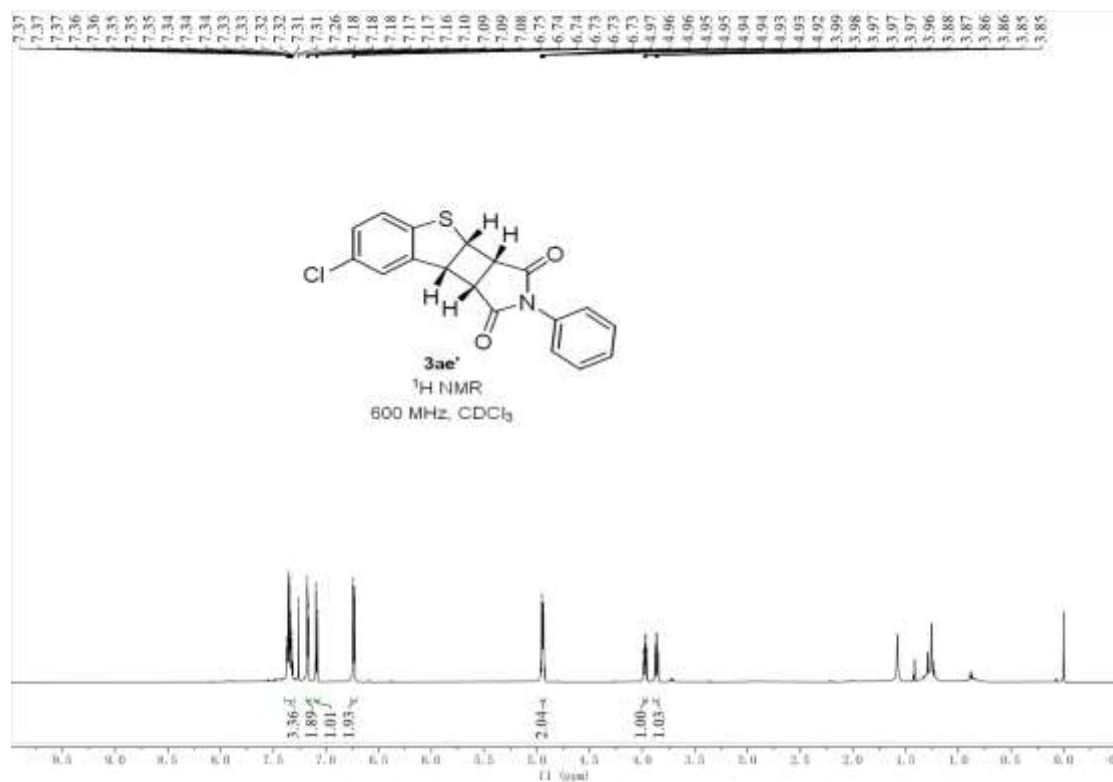

<sup>13</sup>C{<sup>1</sup>H} NMR Spectrum of **3ae'**

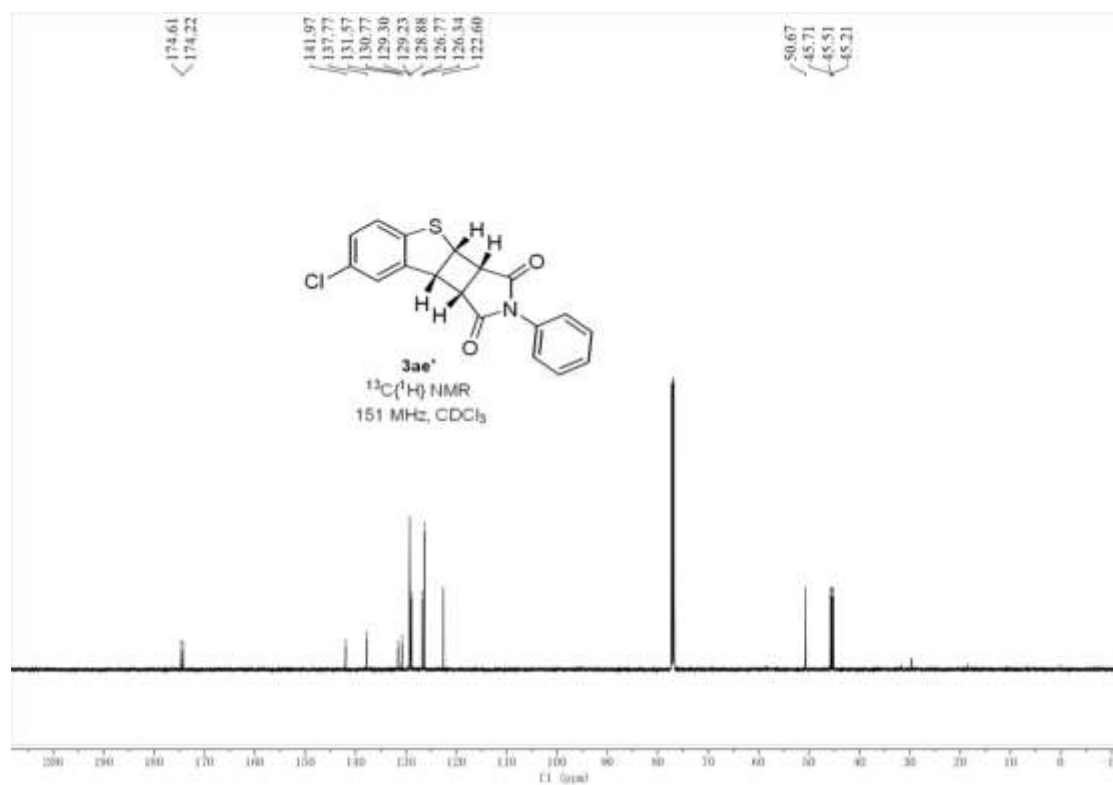

<sup>1</sup>H NMR Spectrum of **3af**

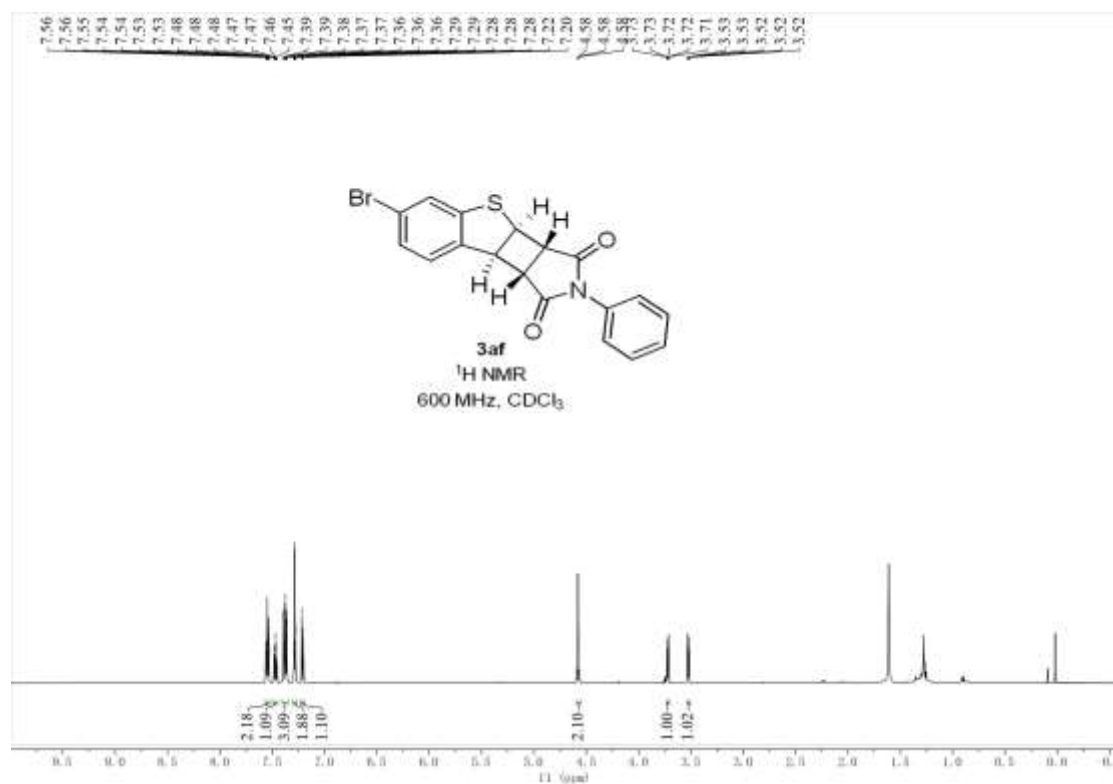

**<sup>13</sup>C{<sup>1</sup>H} NMR Spectrum of 3af**

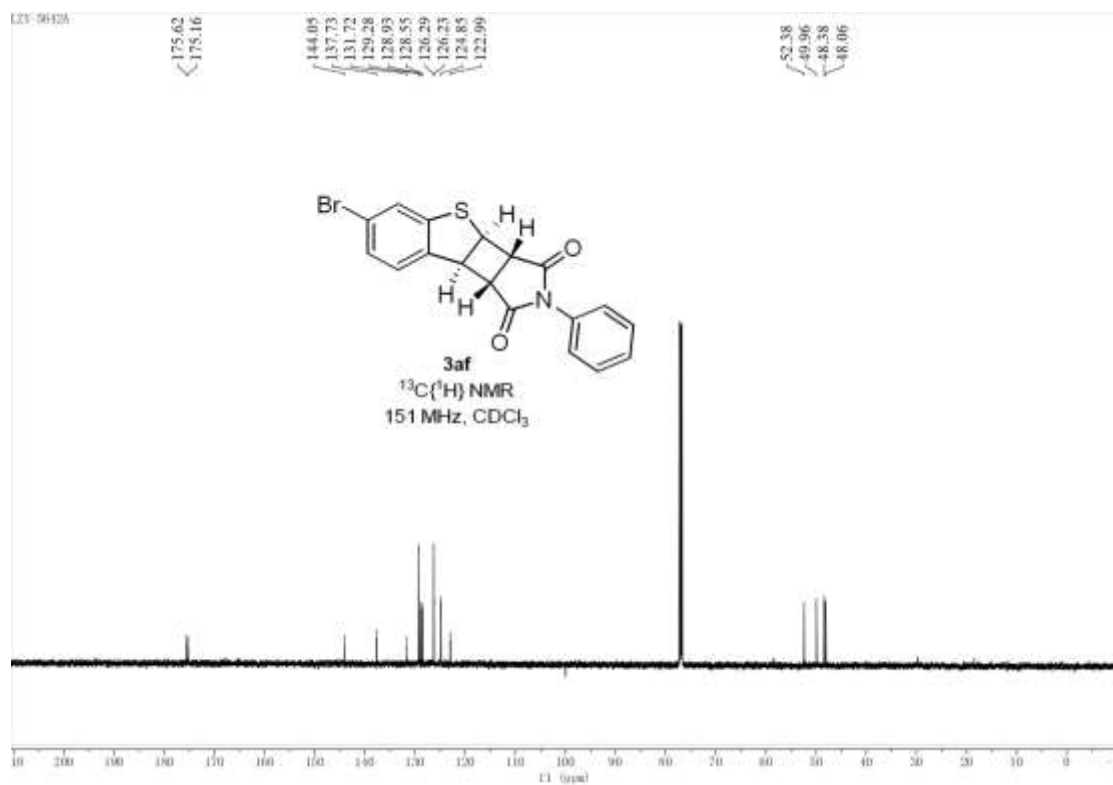

**<sup>1</sup>H NMR Spectrum of 3af'**

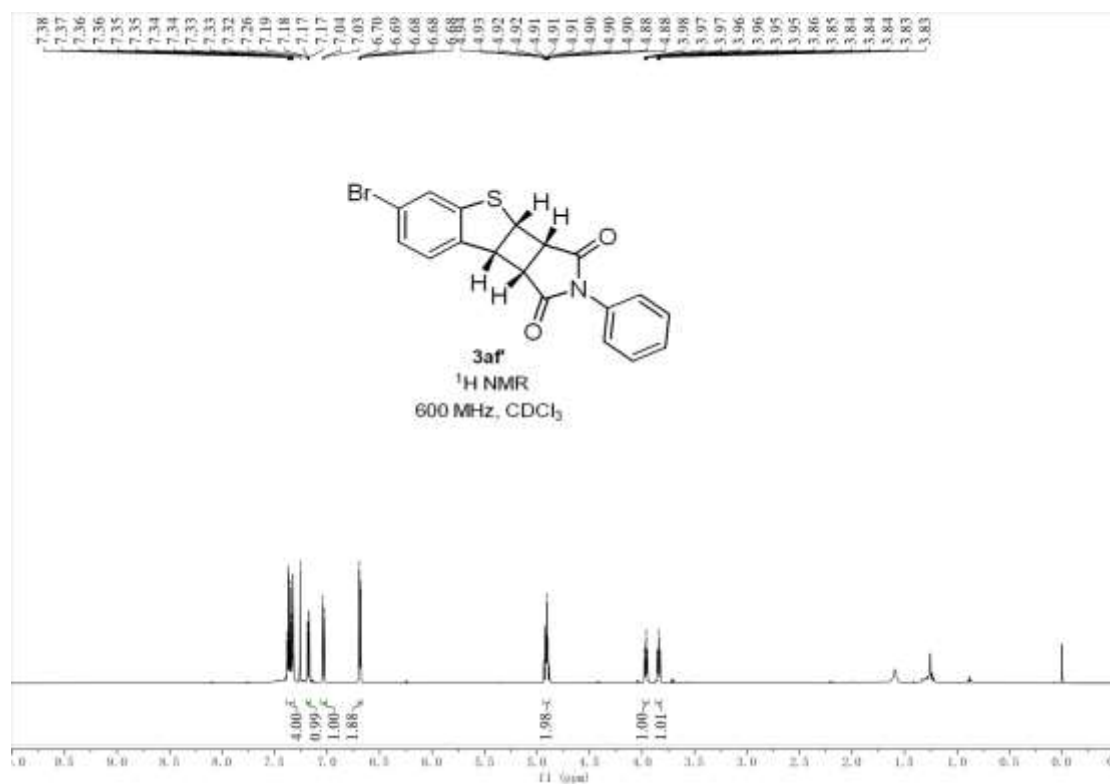

**<sup>13</sup>C{<sup>1</sup>H} NMR Spectrum of 3af**

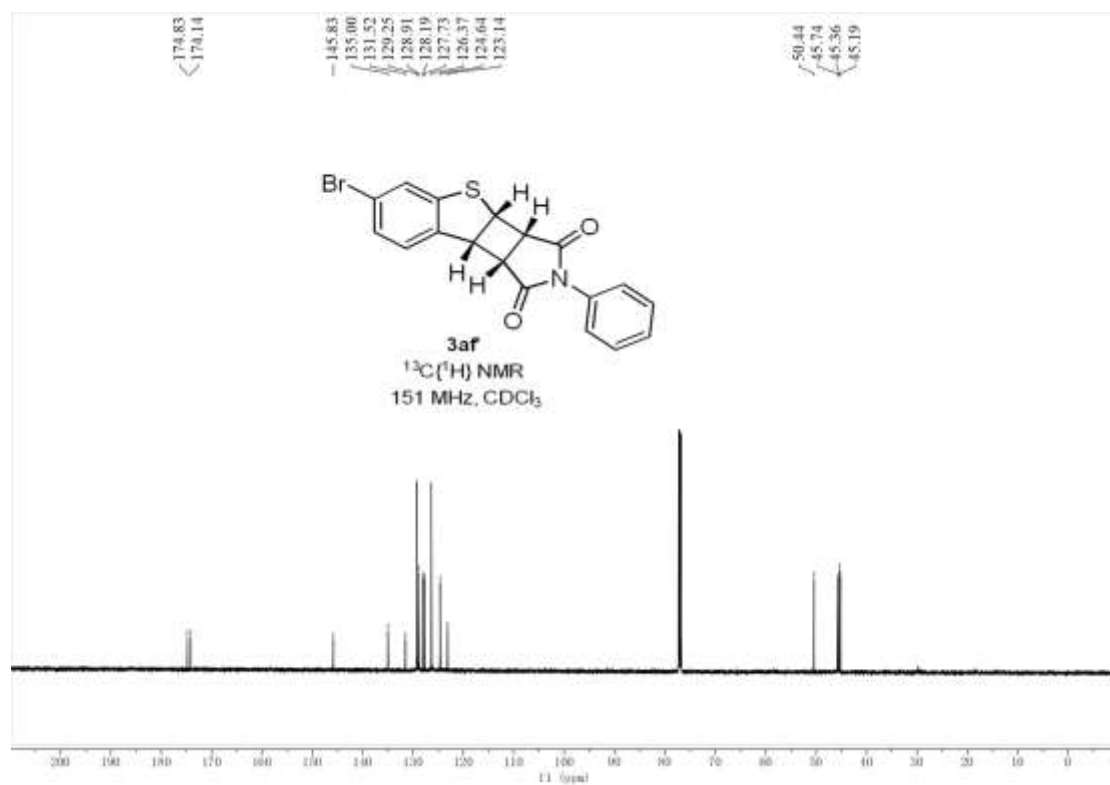

**<sup>1</sup>H NMR Spectrum of 3ag**

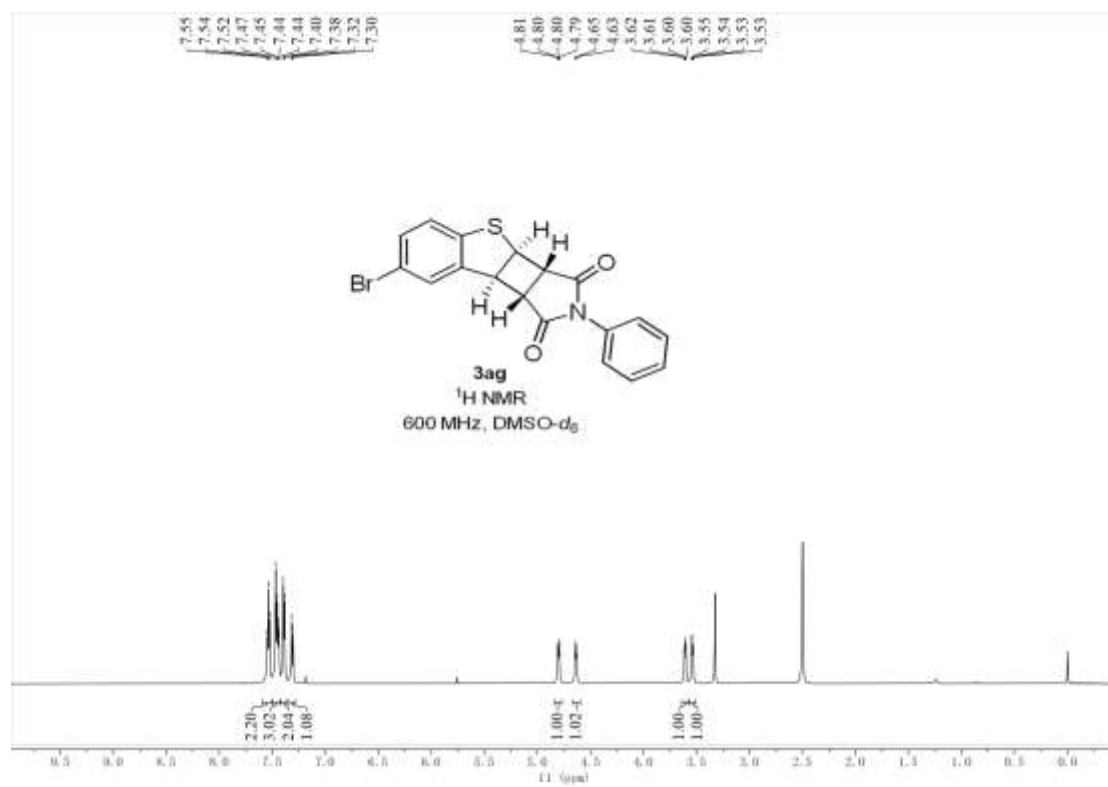

**<sup>13</sup>C{<sup>1</sup>H} NMR Spectrum of 3ag**

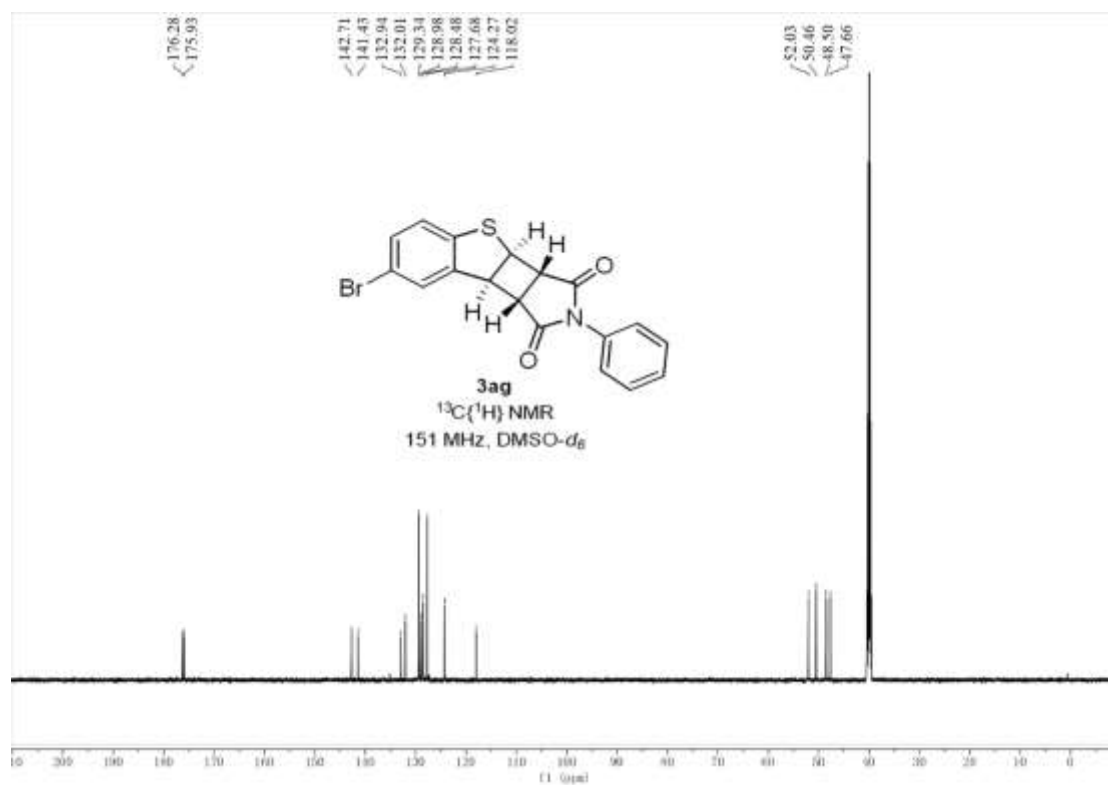

**<sup>1</sup>H NMR Spectrum of 3ag'**



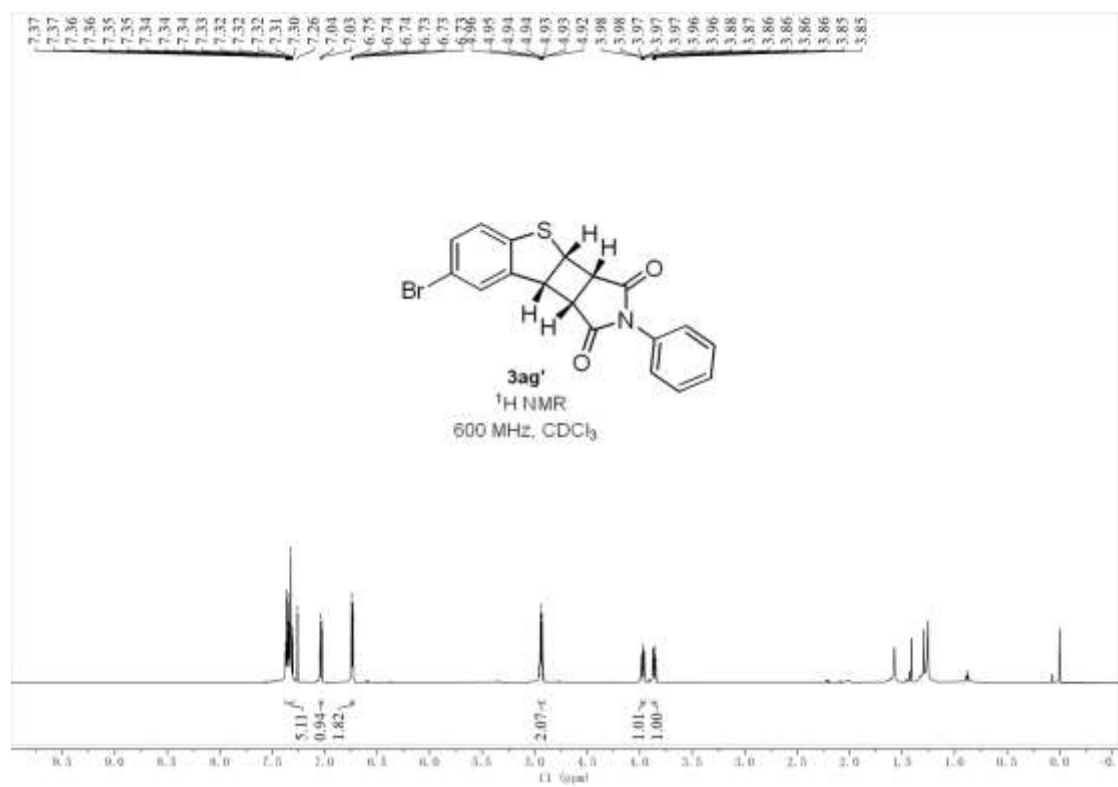

**$^{13}\text{C}\{^1\text{H}\}$  NMR Spectrum of 3ag'**

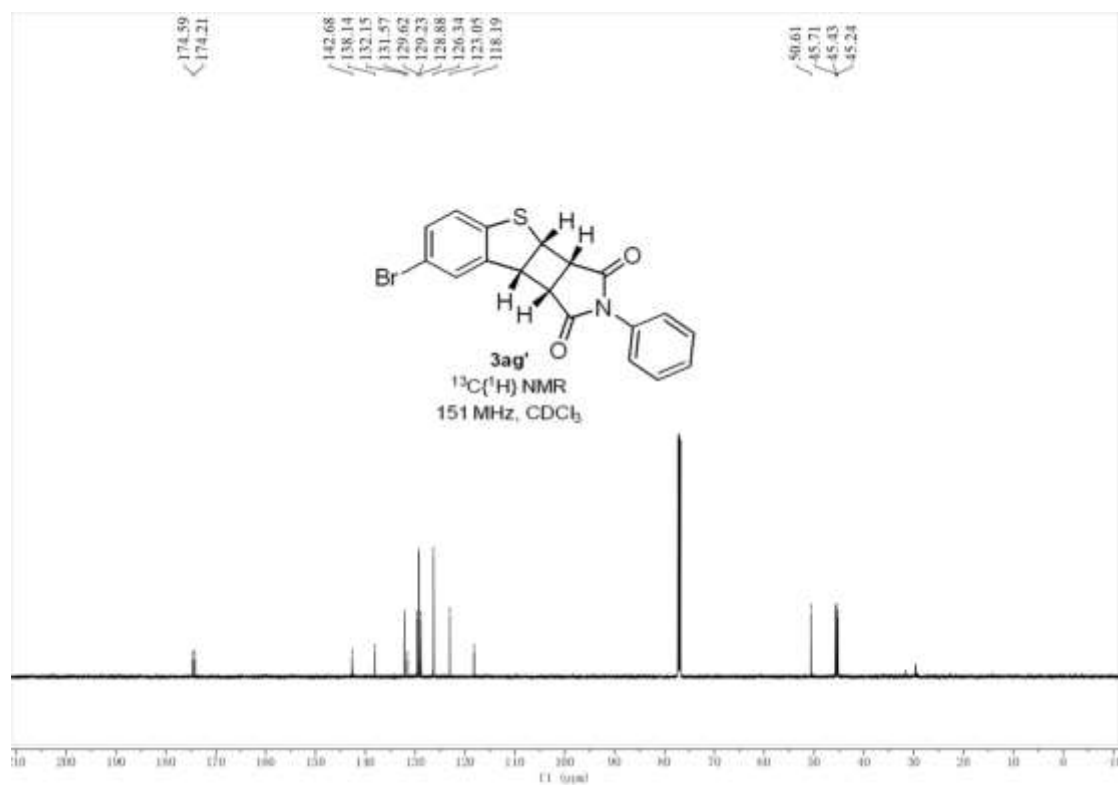

**$^1\text{H NMR}$  Spectrum of 3ah**

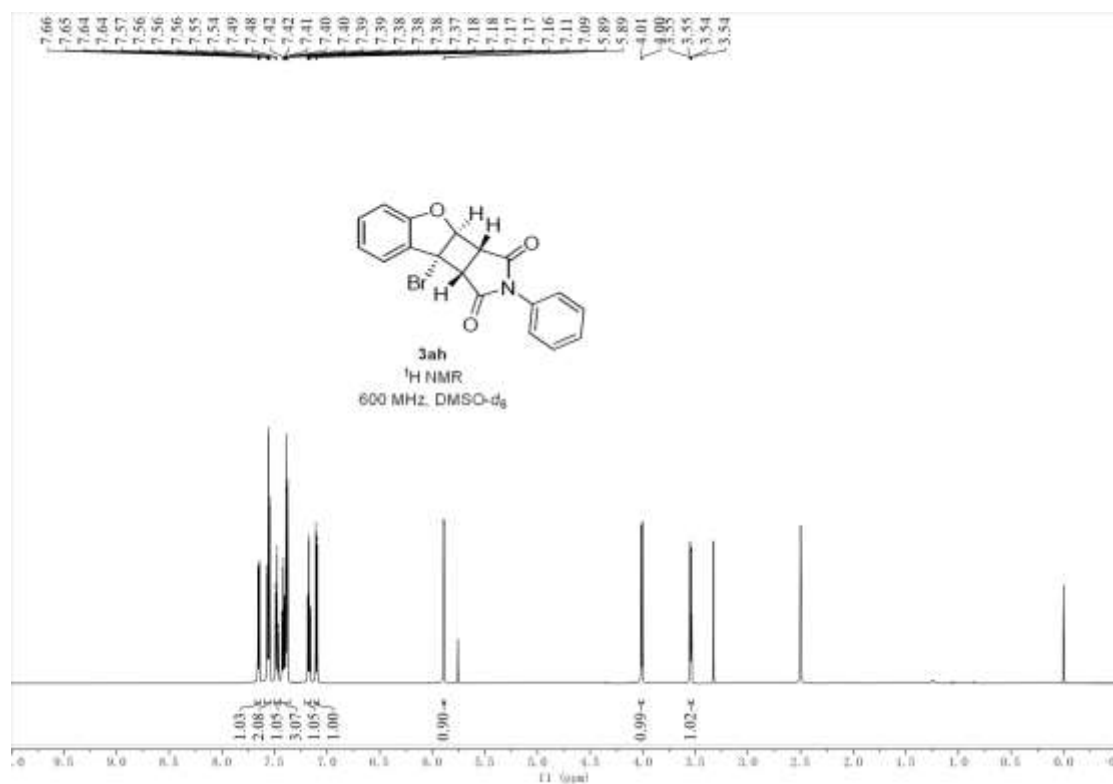

**<sup>13</sup>C{<sup>1</sup>H} NMR Spectrum of 3ah**

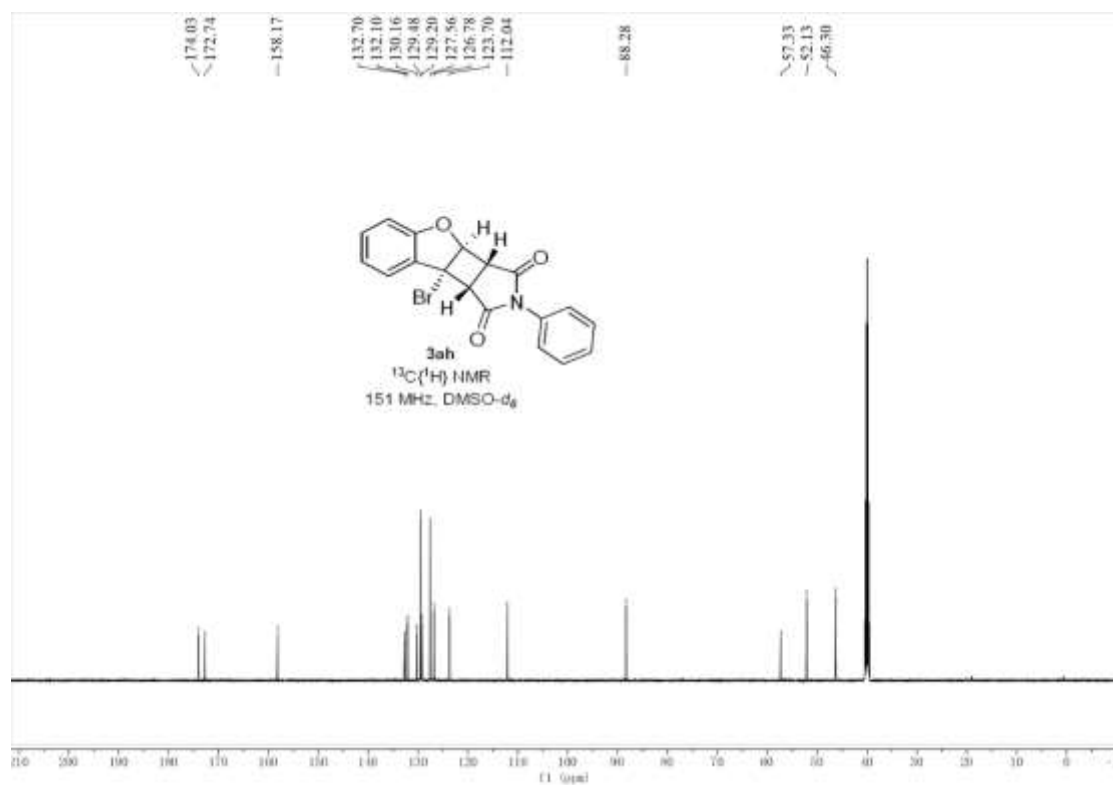

**<sup>1</sup>H NMR Spectrum of 3ah'**

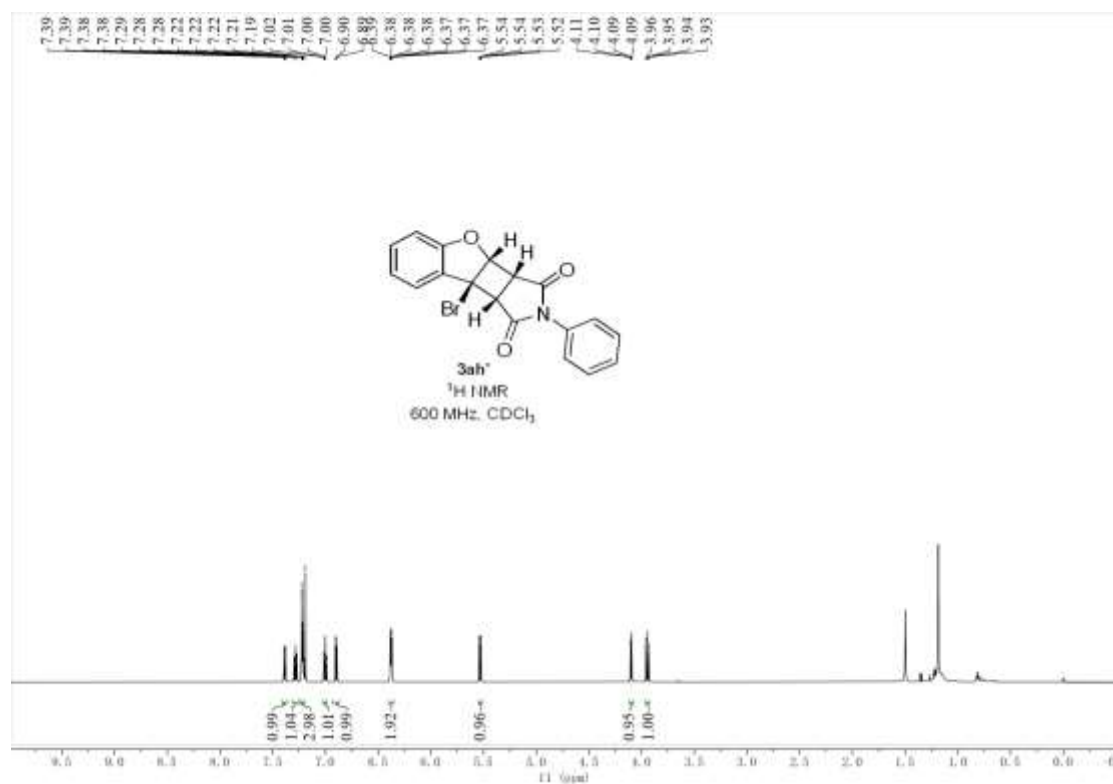

**<sup>13</sup>C{<sup>1</sup>H} NMR Spectrum of 3ah'**

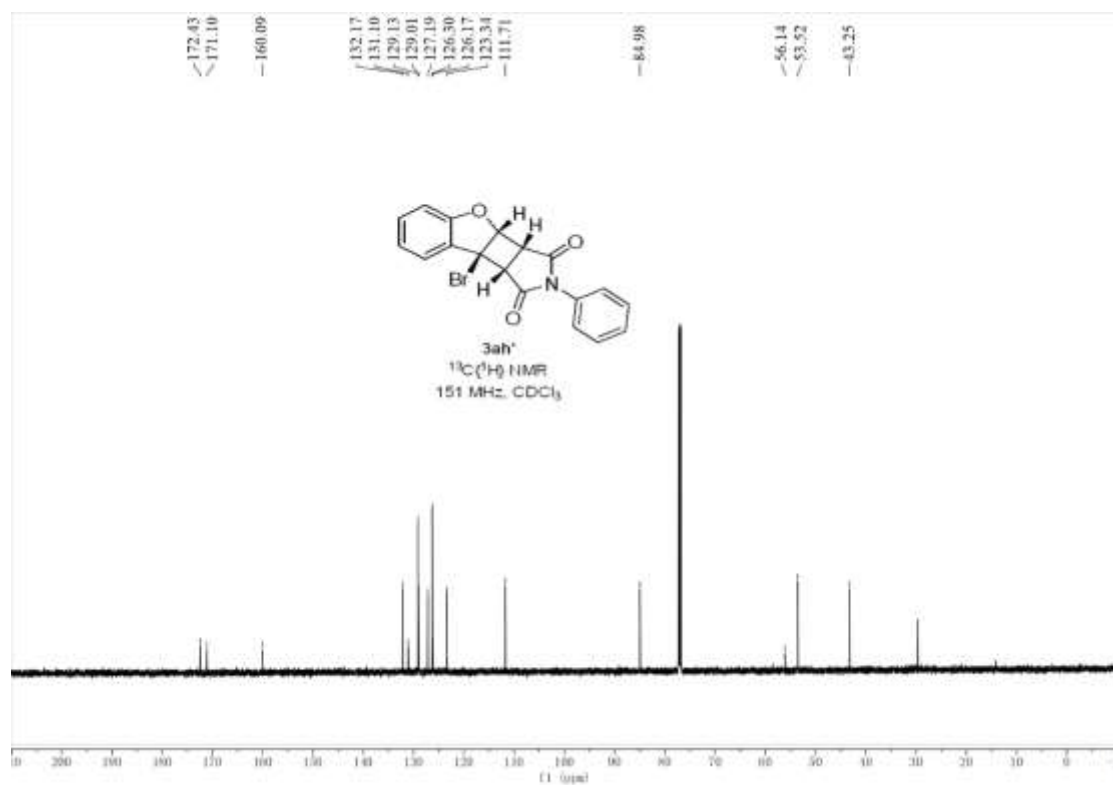

**<sup>1</sup>H NMR Spectrum of 3ai**

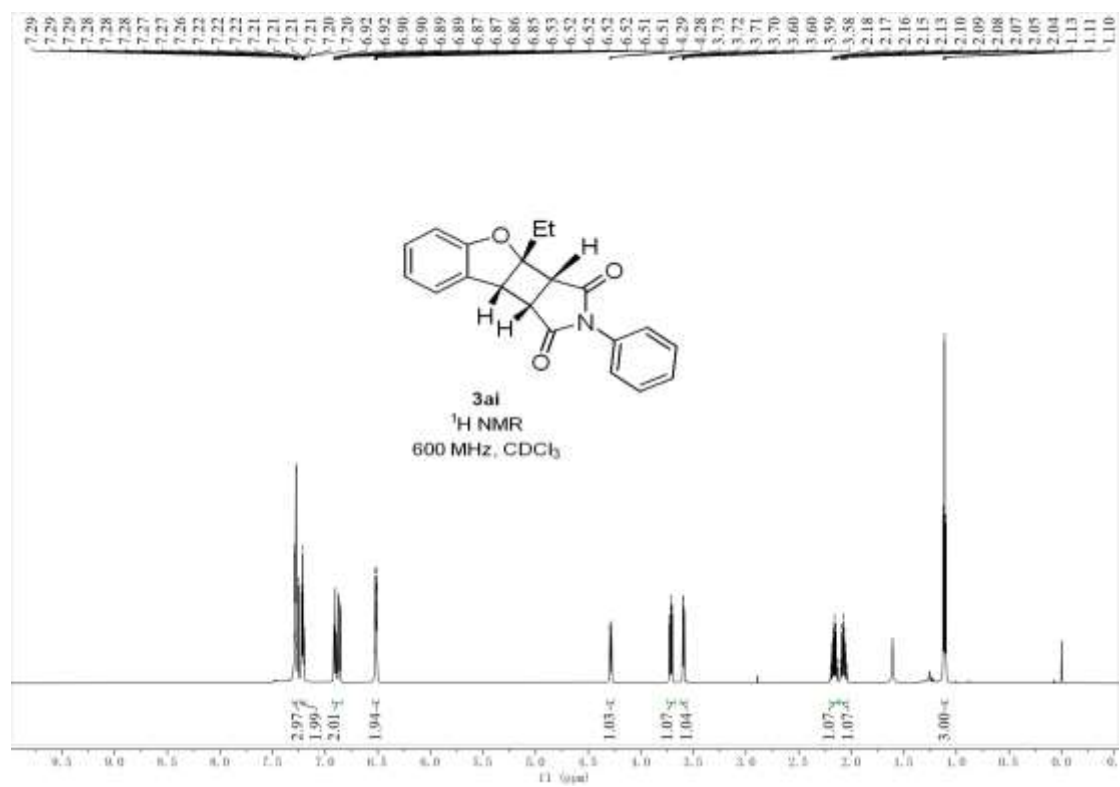

**<sup>13</sup>C{<sup>1</sup>H} NMR Spectrum of 3ai**

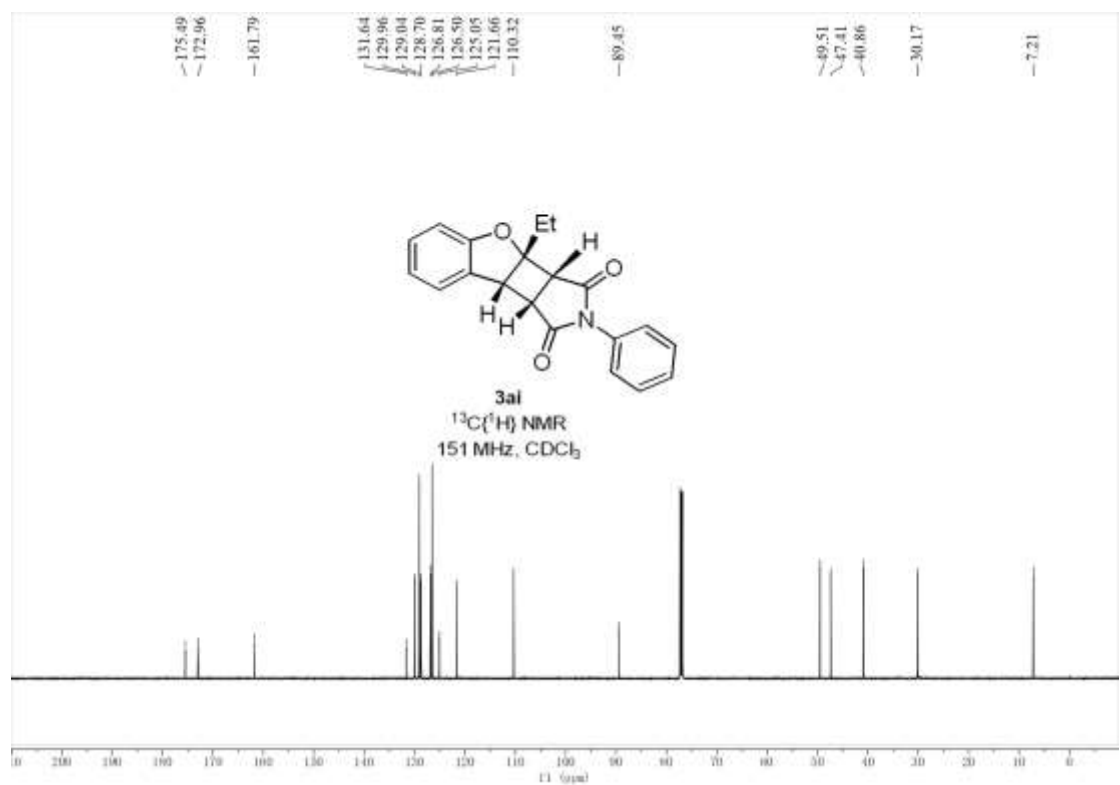

**COSY (400HMZ, CDCl<sub>3</sub>) of 3ai**

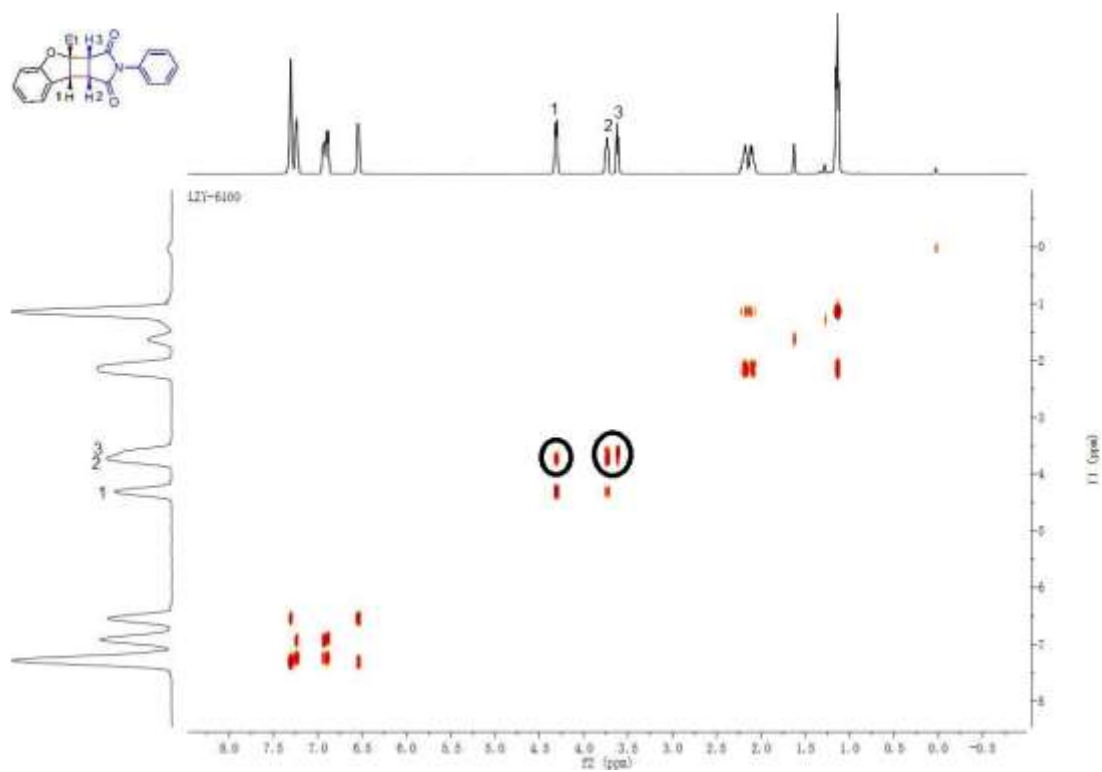

NOESY (400HMZ, CDCl<sub>3</sub>) of 3ai

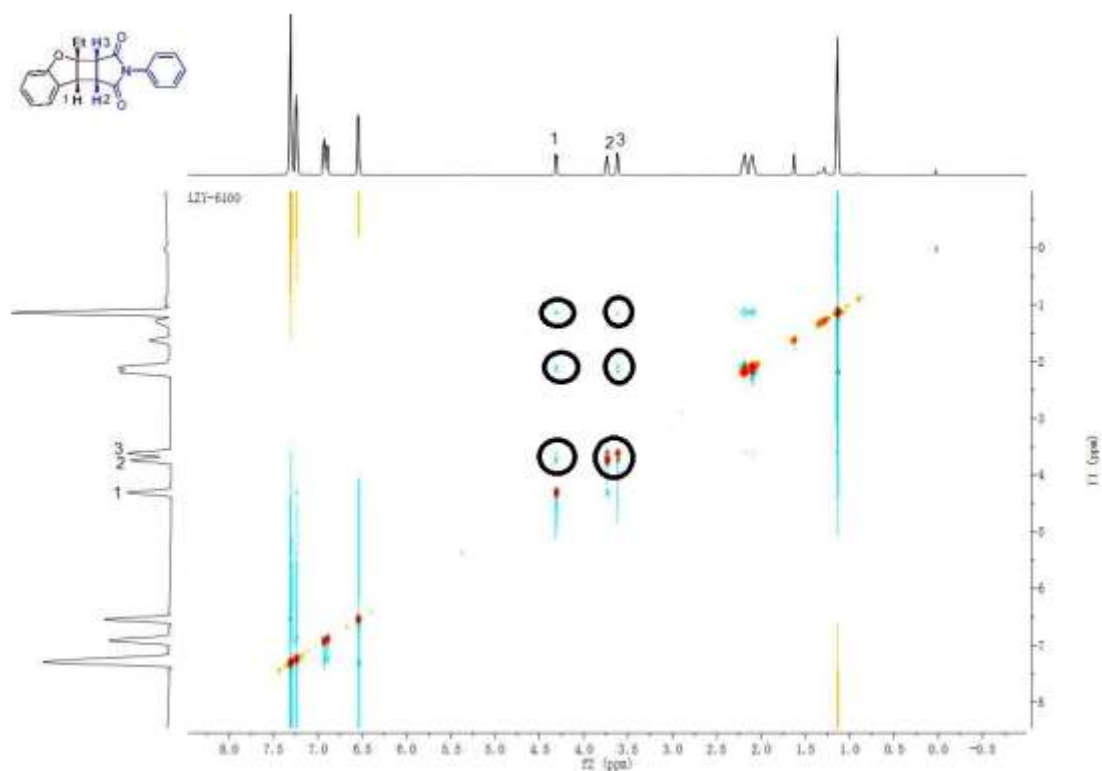

<sup>1</sup>H NMR Spectrum of 3aj

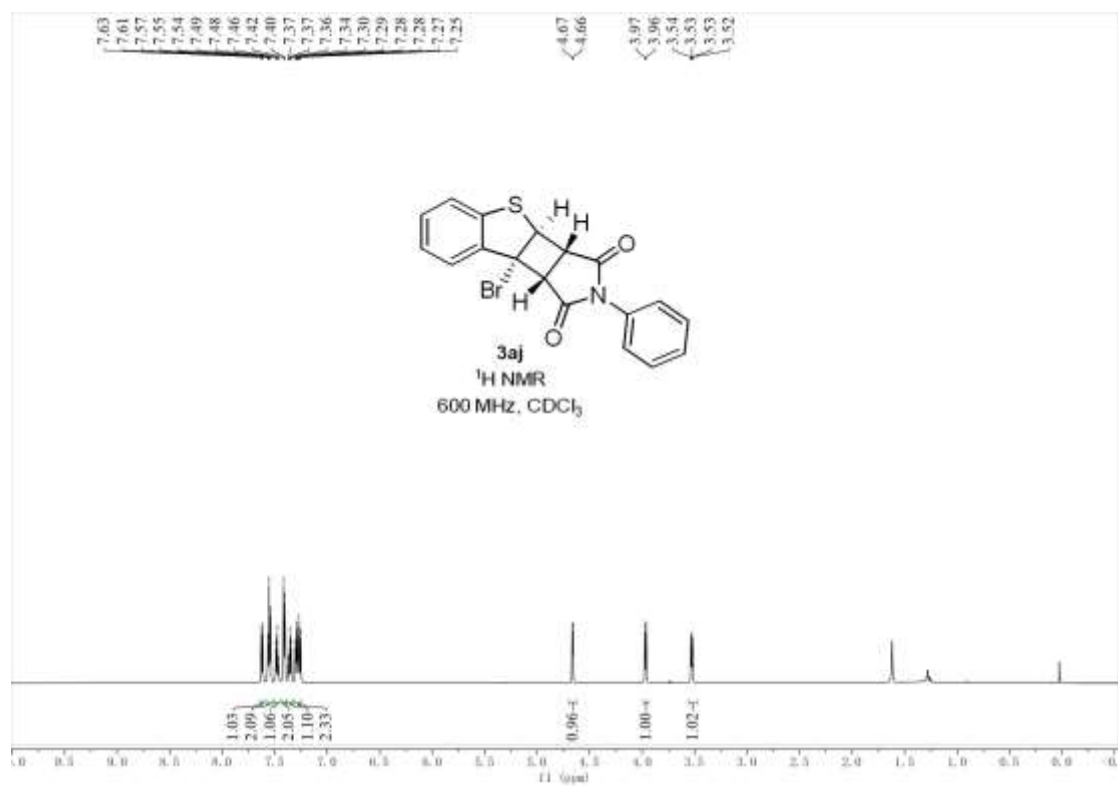

**<sup>13</sup>C{<sup>1</sup>H} NMR Spectrum of 3aj**

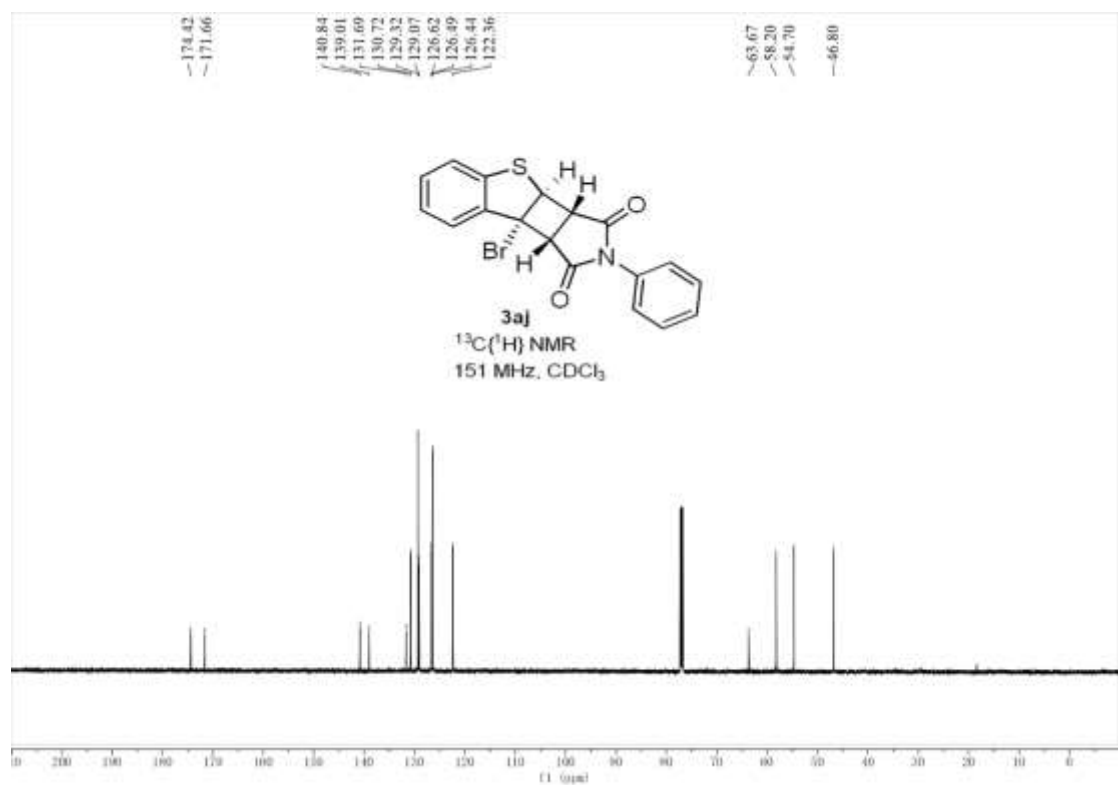

**<sup>1</sup>H NMR Spectrum of 3aj'**

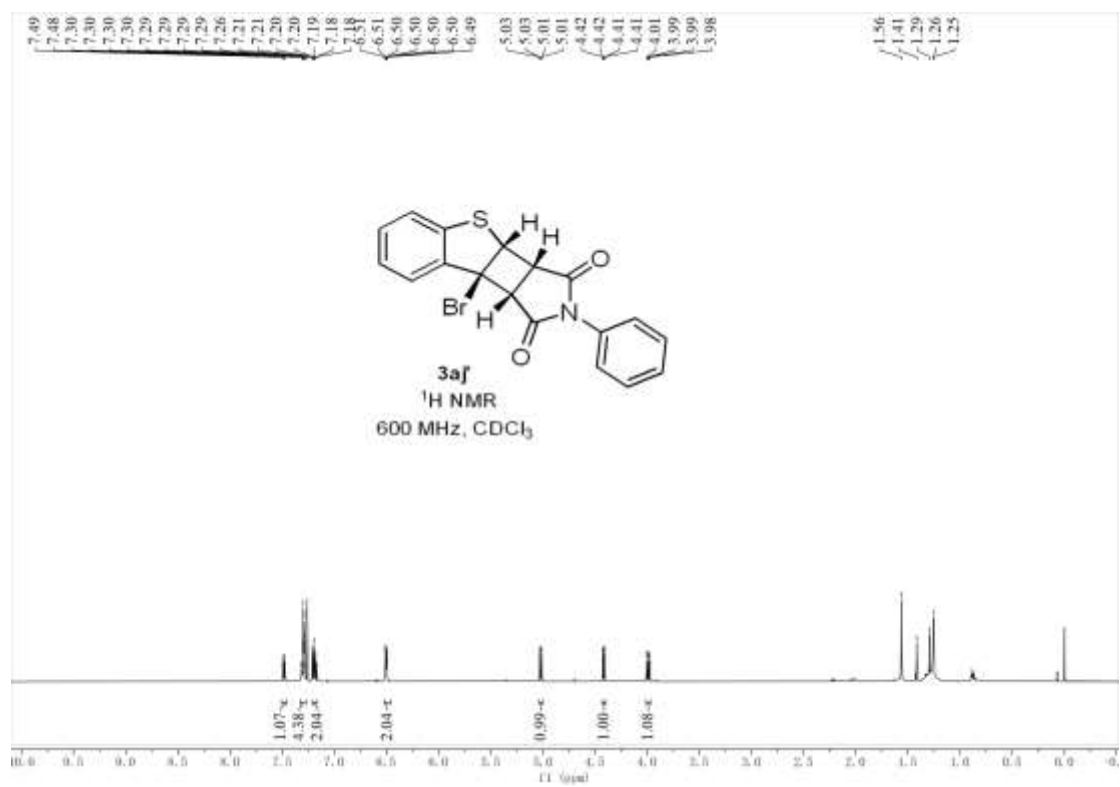

**<sup>13</sup>C{<sup>1</sup>H} NMR Spectrum of 3aj'**

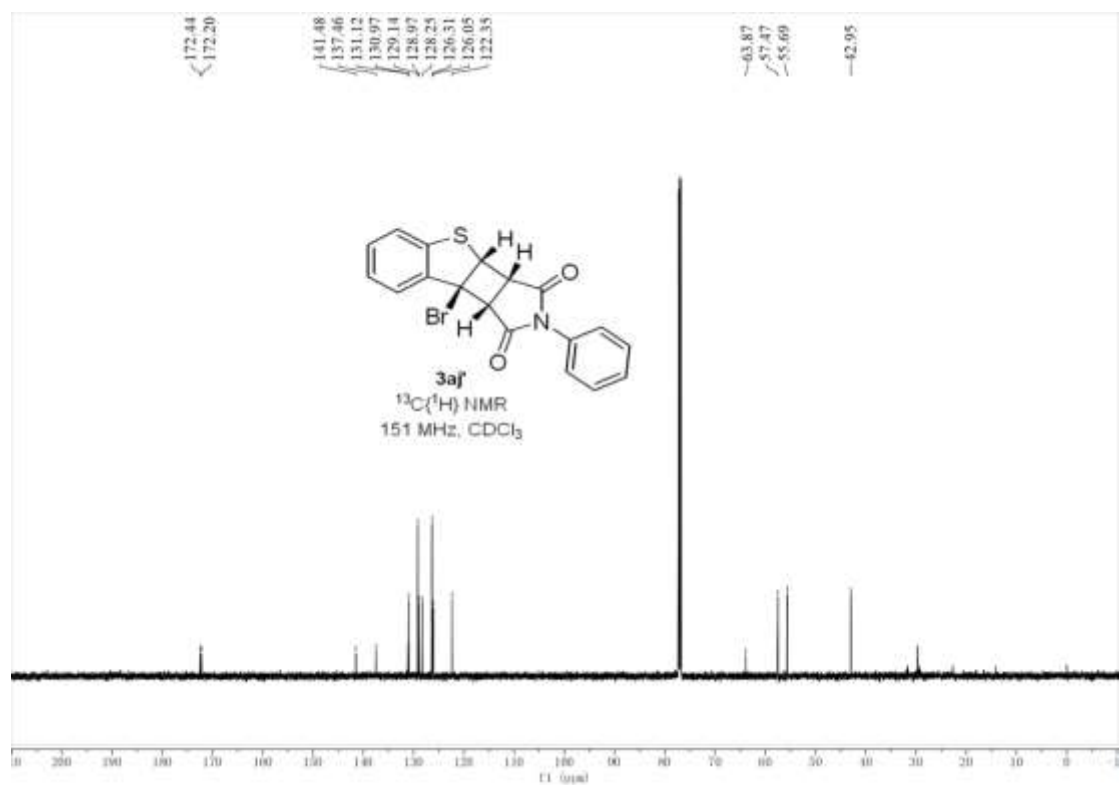

**<sup>1</sup>H NMR Spectrum of 3ak**

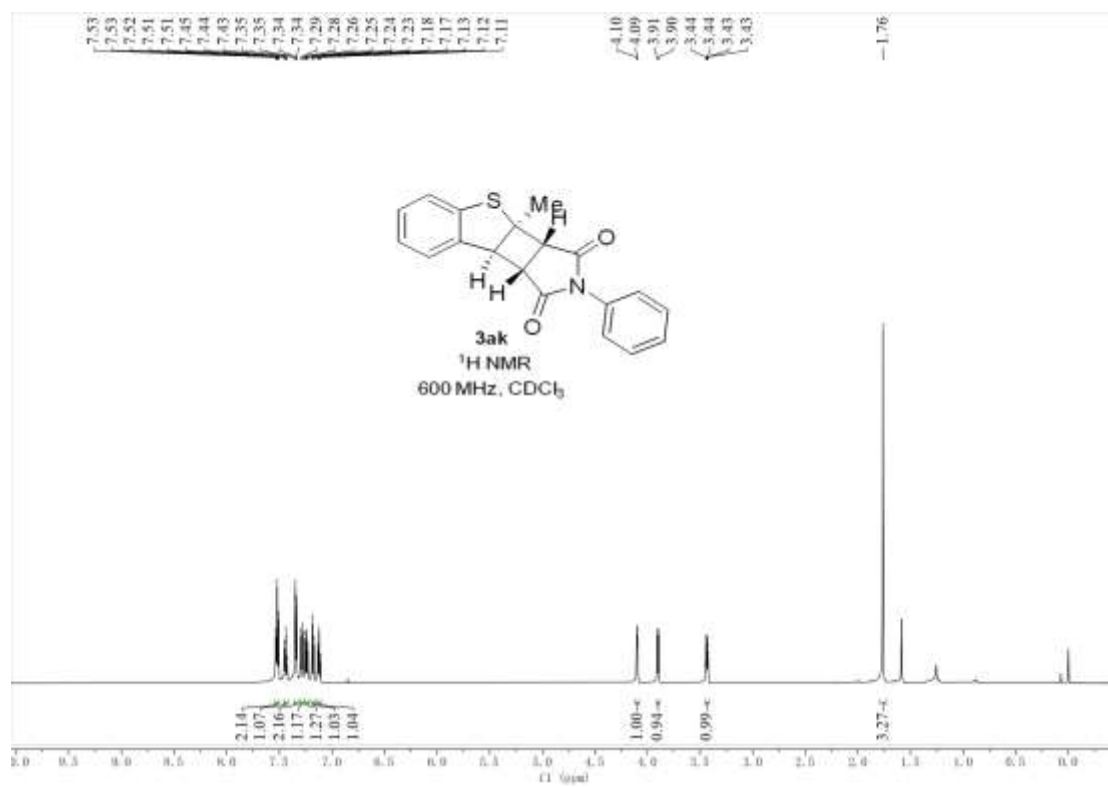

**<sup>13</sup>C{<sup>1</sup>H} NMR Spectrum of 3ak**

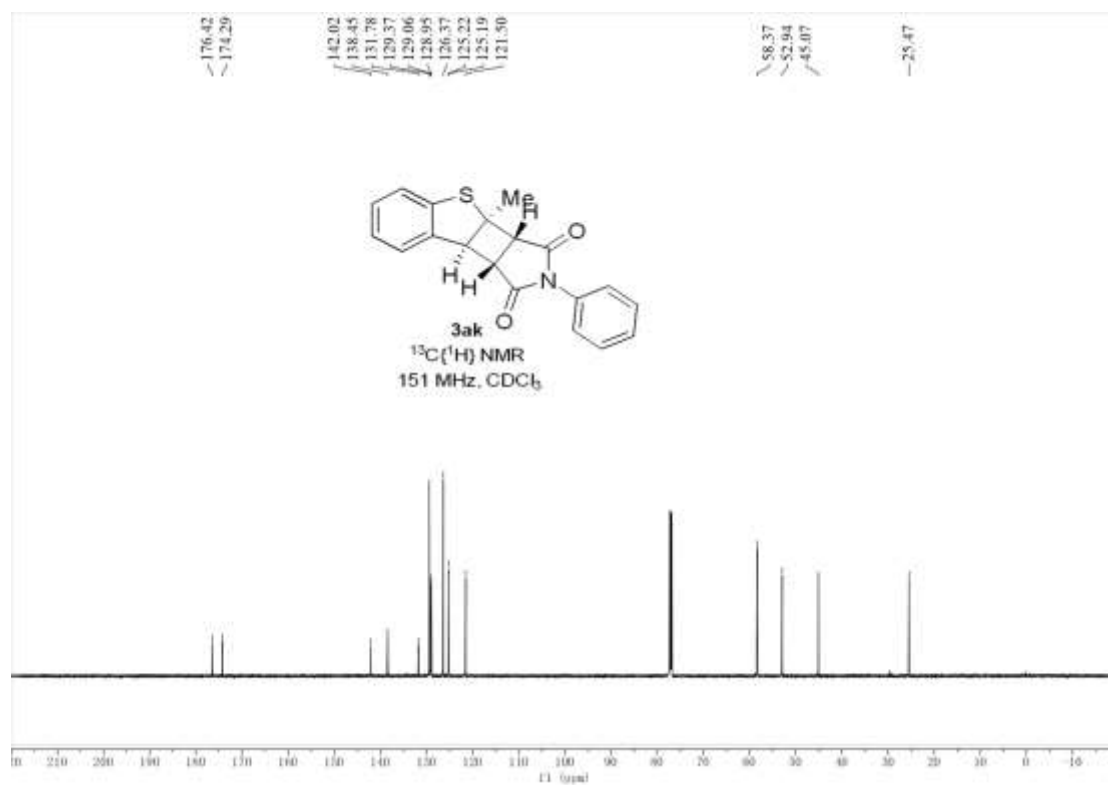

**<sup>1</sup>H NMR Spectrum of 3ak'**





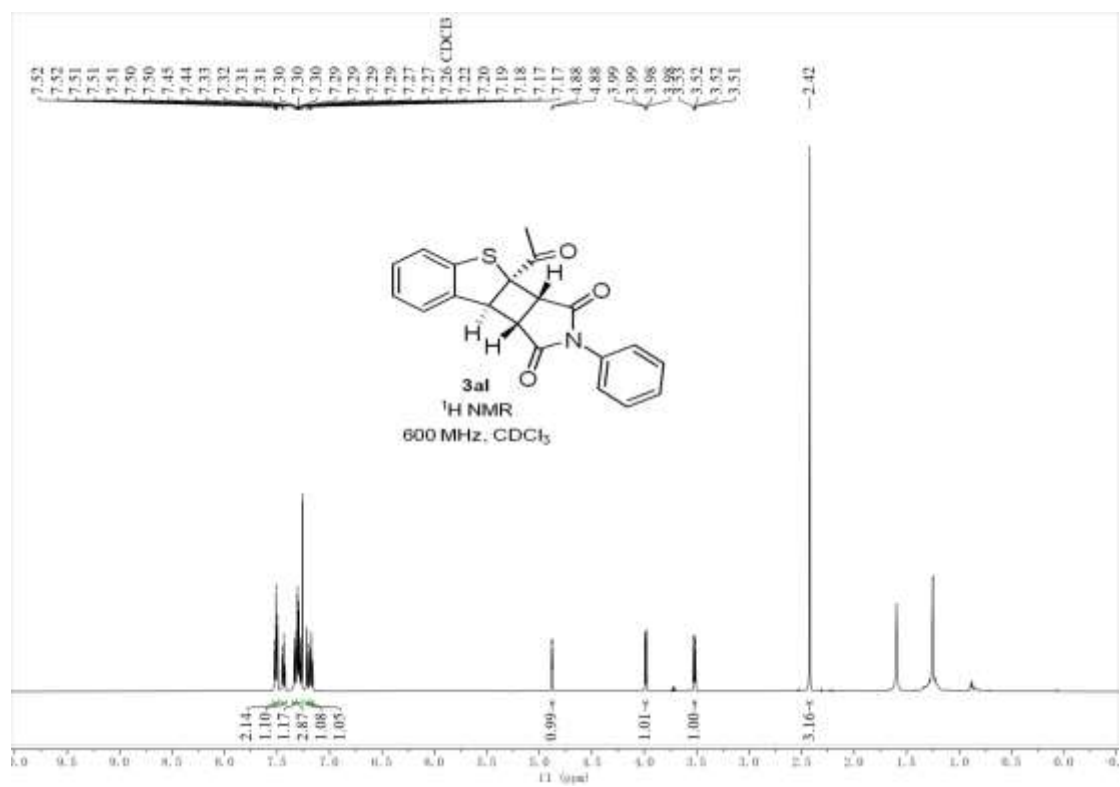

<sup>13</sup>C{<sup>1</sup>H} NMR Spectrum of 3al

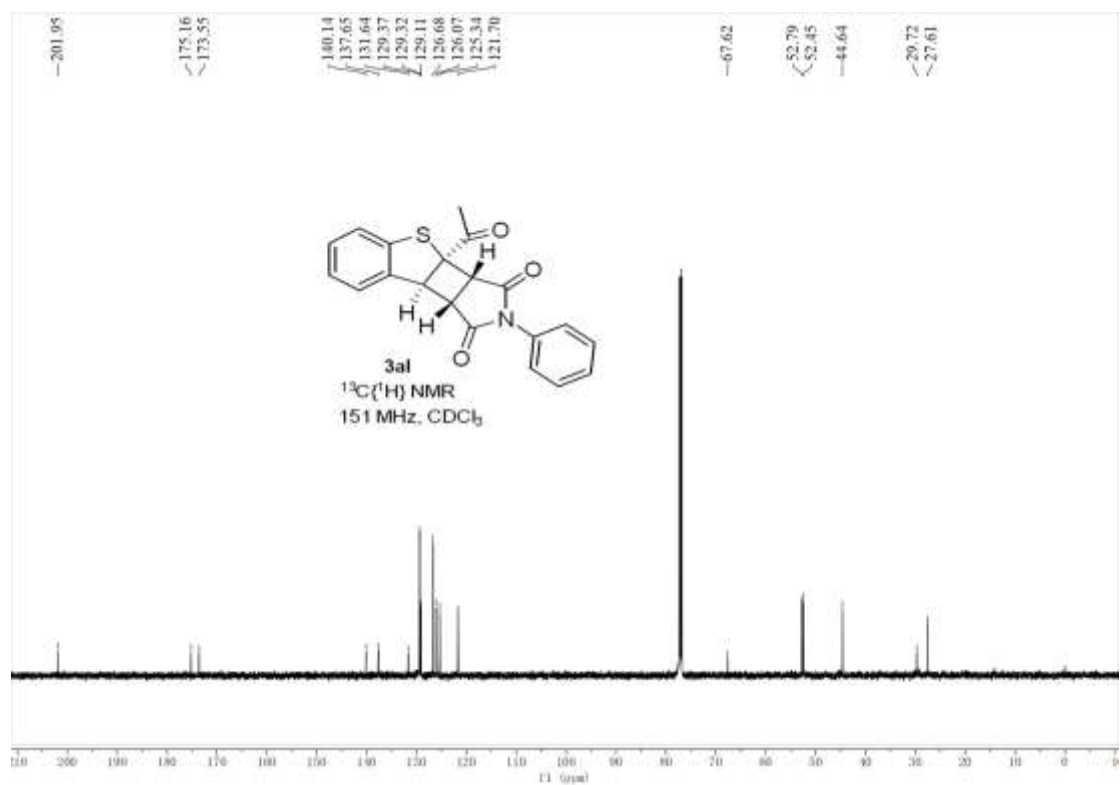

<sup>1</sup>H NMR Spectrum of 3am

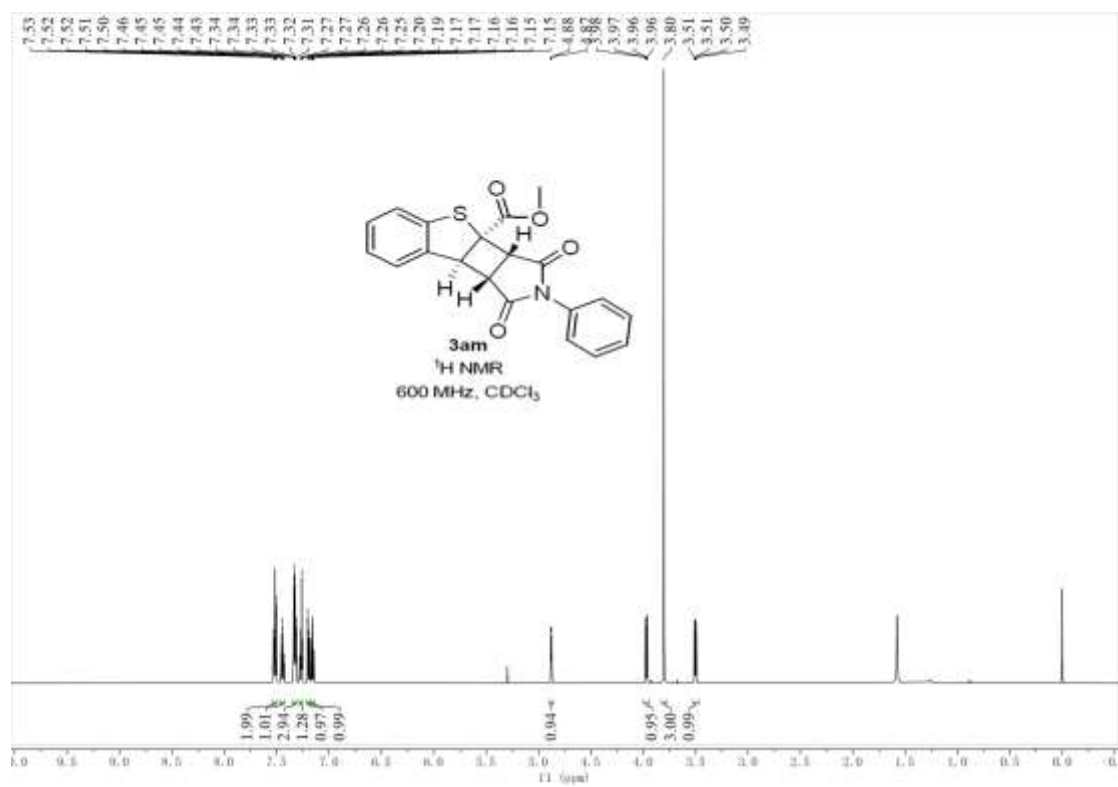

**<sup>13</sup>C{<sup>1</sup>H} NMR Spectrum of 3am**

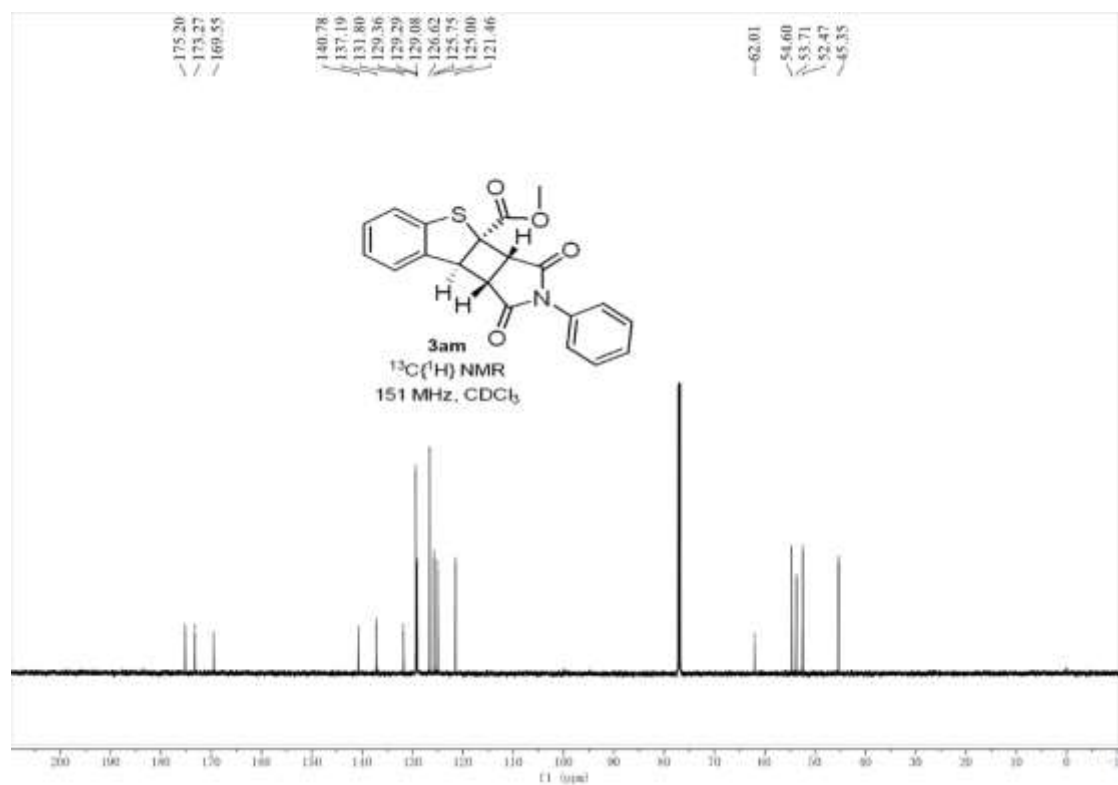

### $^1\text{H}$ NMR Spectrum of 3an

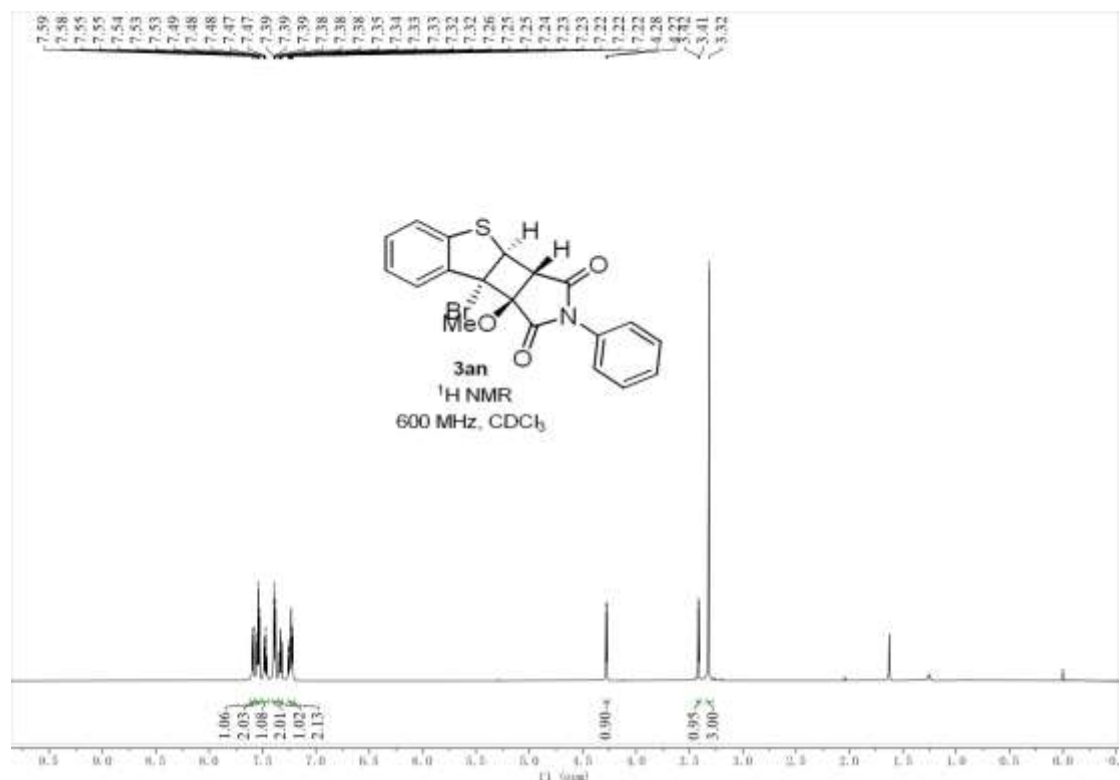

### $^{13}\text{C}\{^1\text{H}\}$ NMR Spectrum of 3an

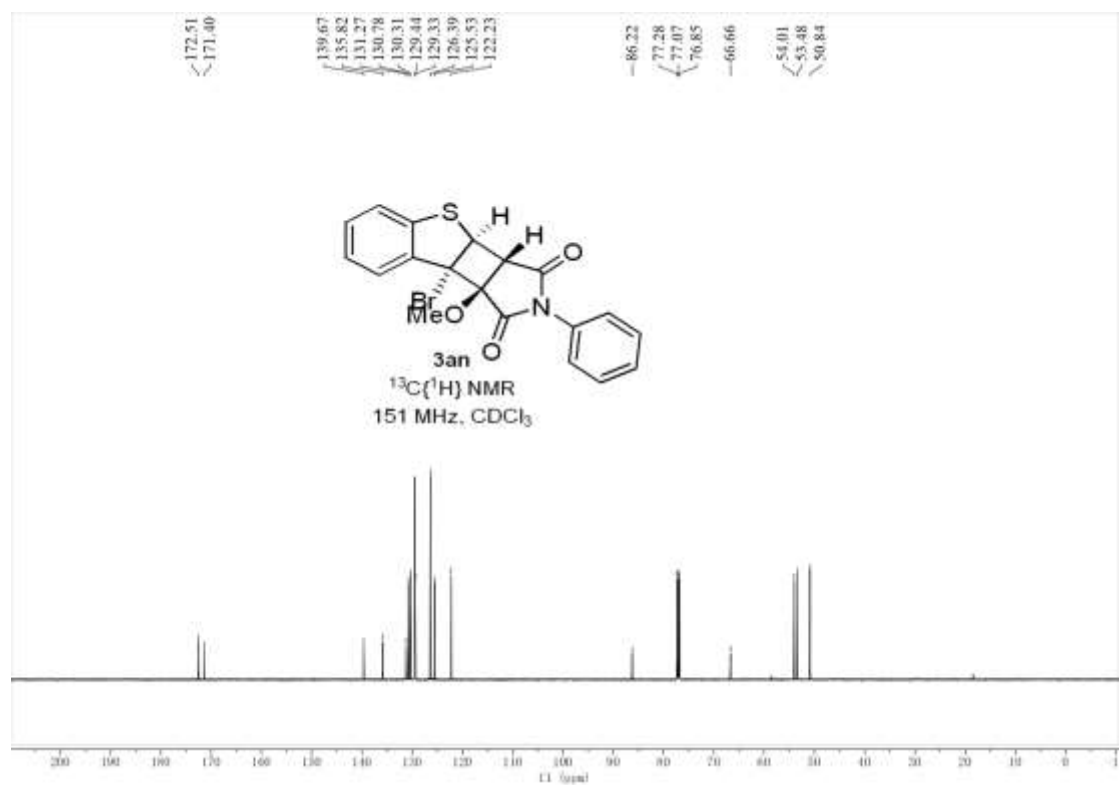

Supplement: d4cc00690a1.pdf [file d4cc00690a1.pdf]
